# Supplementary material
Source: PubMed Central journal article supplement (PMC7768702)
Supplement: pnas.2001018117.sapp.pdf [file pnas.2001018117.sapp.pdf]

1

## 2 **Supplementary Information for**

### 3 **Individualistic evolutionary responses of central African rain forest plants to Pleistocene** 4 **climatic fluctuations**

5 **Andrew J. Helmstetter, Kevin Béthune, Narcisse G. Kamdem, Bonaventure Sonké and Thomas L.P. Couvreur**

6 **Andrew J. Helmstetter.**

7 **E-mail: [andrew.j.helmstetter@gmail.com](mailto:andrew.j.helmstetter@gmail.com)**

#### 8 **This PDF file includes:**

9 Figs. S1 to S38

10 Tables S1 to S7

11 SI References

|    |                                                                       |           |
|----|-----------------------------------------------------------------------|-----------|
| 12 | <b>Contents</b>                                                       |           |
| 13 | <b>Sampling and sequencing</b>                                        | <b>3</b>  |
| 14 | <b>Species information</b>                                            | <b>4</b>  |
| 15 | <b>Mantel tests</b>                                                   | <b>5</b>  |
| 16 | <b>Genetic clustering including geographic information with TESS</b>  | <b>9</b>  |
| 17 | <b>Clustering sensitivity</b>                                         | <b>14</b> |
| 18 | <b>Individual-level maximum-likelihood trees</b>                      | <b>21</b> |
| 19 | <b>Genetic diversity and putative refugia</b>                         | <b>28</b> |
| 20 | <b>Analysis of MOlecular VAriance (AMOVA)</b>                         | <b>36</b> |
| 21 | <b>Fossil calibrations</b>                                            | <b>38</b> |
| 22 | <b>Backbone trees</b>                                                 | <b>39</b> |
| 23 | <b>Backbone-and-patch trees</b>                                       | <b>41</b> |
| 24 | <b>Species trees reconstructed using StarBEAST and DENIM</b>          | <b>43</b> |
| 25 | <b>Testing the effect of using alleles and lognormal clock models</b> | <b>50</b> |
| 26 | <b>Ecological Niche Models (ENMs)</b>                                 | <b>52</b> |
| 27 | <b>distance-based RedunDancy Analysis (db-RDA)</b>                    | <b>61</b> |

| Family     | Genus                   | Epithet           | Samples | 75/75 | Total length (bp) | SNPs | Loci |
|------------|-------------------------|-------------------|---------|-------|-------------------|------|------|
| Arecaceae  | <i>Podococcus</i>       | <i>acaulis</i>    | 37      | 119   | 277199            | 2565 | 137  |
| Arecaceae  | <i>Podococcus</i>       | <i>barteri</i>    | 88      | 120   | 216143            | 1918 | 144  |
| Arecaceae  | <i>Sclerosperma</i>     | <i>mannii</i>     | 129     | 160   | 316075            | 3378 | 155  |
| Annonaceae | <i>Annickia</i>         | <i>affinis</i>    | 112     | 351   | 756665            | 5963 | 262  |
| Annonaceae | <i>Anonidium</i>        | <i>mannii</i>     | 109     | 365   | 766765            | 5311 | 293  |
| Annonaceae | <i>Monanthes</i>        | <i>enghiana</i>   | 105     | 356   | 781943            | 3469 | 243  |
| Annonaceae | <i>Greenwayodendron</i> | <i>suaveolens</i> | 145     | 338   | 650322            | 5960 | 312  |

**Table S1. Information on sampling of individuals used for genetic data. 75/75 indicates the number of loci (after paralogs were removed) reconstructed using the hybpipe pipeline for phylogenetic inference in which  $\geq 75\%$  of the exon length was recovered in  $\geq 75\%$  of individuals. Total length is the sum of the length of all 75/75 supercontigs (exon + introns). Loci indicates the number of loci and SNPs recovered using the SECAPR pipeline. We note that three individuals of *P. acaulis* did not have location data, and so were excluded from analyses with a geographic component.**

## Species information

| genus                                    | <i>Annickia.affinis</i>                | <i>Anonidium.mannii</i>       | <i>Greenwayodendron.suaveolens</i>                    |
|------------------------------------------|----------------------------------------|-------------------------------|-------------------------------------------------------|
| Habit                                    | Tree                                   | Tree                          | Tree                                                  |
| Max size (m)                             | up to 30                               | 8–30                          | 8–45                                                  |
| Forest stratum                           | canopy                                 | canopy                        | canopy                                                |
| Habitat                                  | lowland evergreen rain forest          | lowland evergreen rain forest | lowland to premontane evergreen/semi-deciduous forest |
| Soil ecology                             | terra firma/periodically flooded soils | terra firma                   | terra firma                                           |
| Sex                                      | Hermaphrodite                          | Androdioecious                | Androdioecious                                        |
| Pollination                              | entomophilous                          | entomophilous                 | entomophilous                                         |
| Number of fruits                         | 3 to 34                                | 1                             | 2 to 8                                                |
| Number of seeds                          | 1                                      | 50–100                        | 1–4                                                   |
| Fruit dimension (cm)                     | 2–3.5 x 1–1.5                          | 25–50 x 10–30                 | 0.7–1.6 x 0.7–1.6                                     |
| Fruit structure                          | stipitate, fleshy                      | stipitate, syncarpous, fleshy | stipitate, mericarp medium hard, fleshy inside        |
| color at maturity                        | dark purple - black                    | yellow                        | green reddish                                         |
| Dispersal syndrome (primary / secondary) | bird-monkey                            | monkey, elephants             | bird-monkey / elephant                                |
| Inferred dispersal                       | potentially medium to widespread       | potentially limited           | potentially medium to widespread                      |

| genus                                    | <i>Monanthataxis.enghiana</i>                         | <i>Podococcus.acaulis</i>     | <i>Podococcus.barteri</i>              | <i>Sclerosperma.mannii</i>            |
|------------------------------------------|-------------------------------------------------------|-------------------------------|----------------------------------------|---------------------------------------|
| Habit                                    | Liana                                                 | Shrub                         | Shrub                                  | Shrub                                 |
| Max size (m)                             | up to 15                                              | 3–4                           | 2–3                                    | 2–5                                   |
| Forest stratum                           | understory/canopy                                     | understory                    | understory                             | understory                            |
| Habitat                                  | lowland to premontane evergreen/semi-deciduous forest | lowland evergreen rain forest | lowland evergreen rain forest          | lowland evergreen rain forest         |
| Soil ecology                             | terra firma/periodically flooded soils                | terra firma soil              | terra firma/periodically flooded soils | periodically flooded soil             |
| Sex                                      | Hermaphrodite                                         | Monoecious                    | Monoecious                             | Monoecious                            |
| Pollination                              | entomophilous                                         | entomophilous                 | entomophilous                          | entomophilous                         |
| Number of fruits                         | 5 to 15                                               | 20 to 30                      | 20 to 30                               | up to 17                              |
| Number of seeds                          | 1–4                                                   | 1–3                           | 1–3                                    | 1                                     |
| Fruit dimension (cm)                     | 1.4–3.4 x 8–9                                         | 2–3 x 0.5–1                   | 3 x 0.6                                | 2.5–3 x 2–3                           |
| Fruit structure                          | moniliformes, fleshy                                  | sessil, fleshy                | sessil, fleshy                         | sessile, mericarp hard, fleshy inside |
| color at maturity                        | dull purple/brown                                     | dark purple                   | dark purple                            | brown                                 |
| Dispersal syndrome (primary / secondary) | bird-monkey                                           | Ruminant-rodent               | Ruminant-rodent                        | Ruminant-rodent / elephants           |
| Inferred dispersal                       | potentially medium to widespread                      | potentially limited           | potentially limited                    | potentially limited                   |

Table S2. Information on the taxonomy, morphology, life history and ecology of the seven chosen species in our study.

## 30 **Mantel tests**

31 We tested the amount of spatial structure in each of our species SNP datasets using Mantel tests. This approach assesses the  
32 correlation between geographic distance and genetic distance, i.e. the presence of isolation-by-distance (IBD). The Mantel  
33 statistic is the correlation between two dissimilarity matrices (pairwise geographic and pairwise genetic distance). The genetic  
34 matrix consisted of pairwise distances among all individuals for each species. We used the *mantel* function ('pearson' method)  
35 in the R package 'vegan' (1) and calculated significance by performing 9999 random permutations. We then compared these  
36 to the observed value of the Mantel statistic. We found that all species exhibited significant isolation-by-distance patterns.

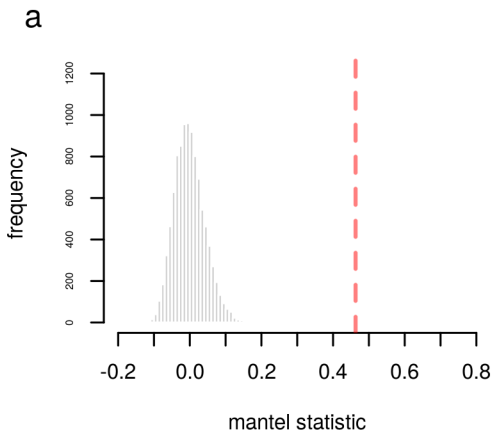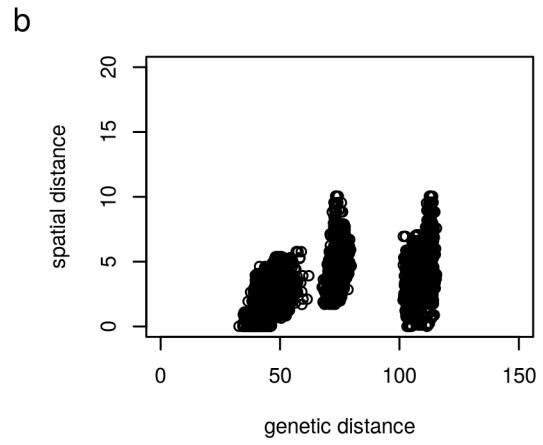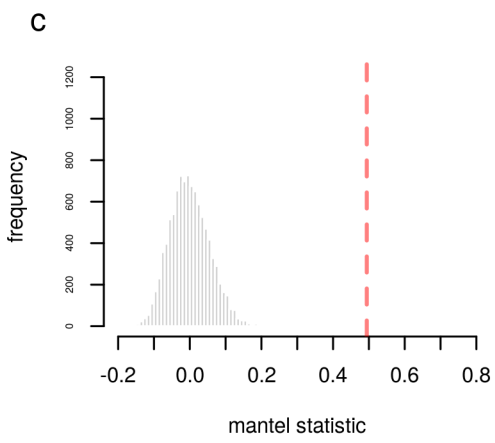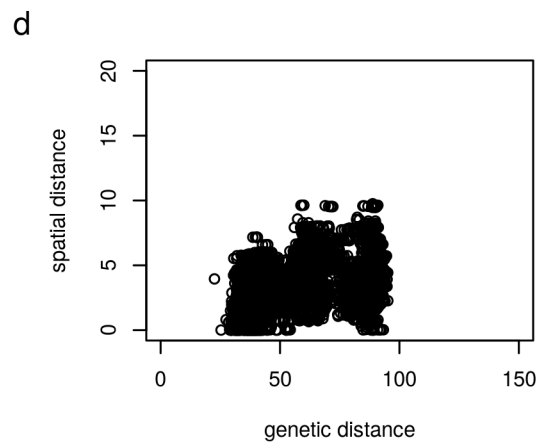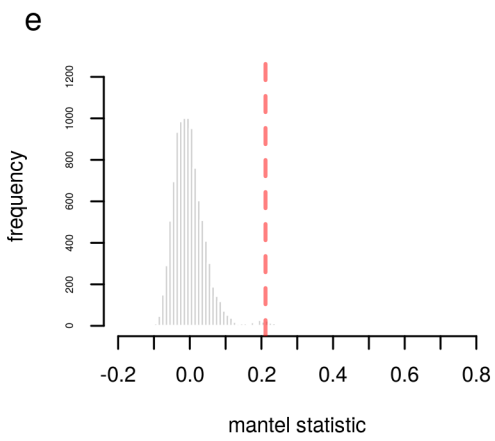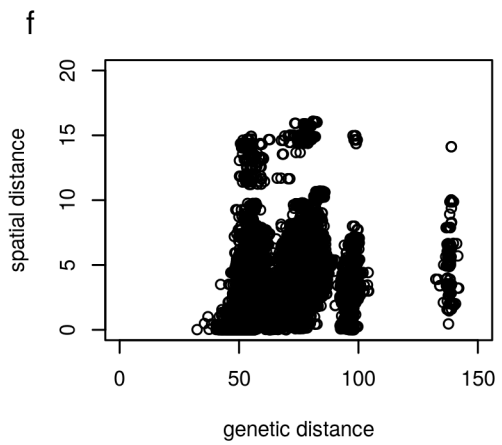

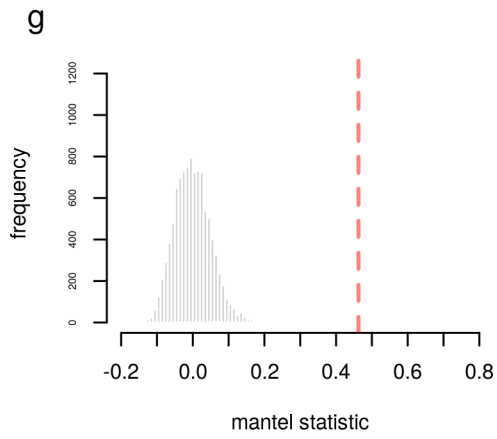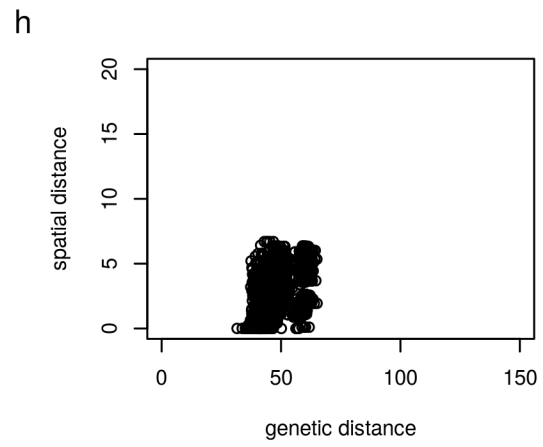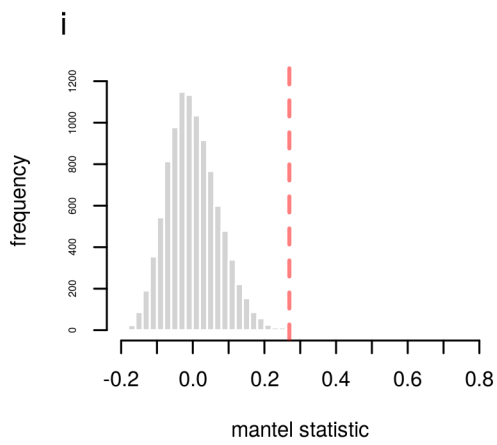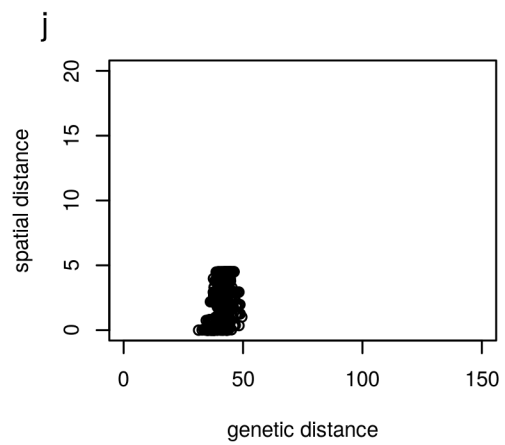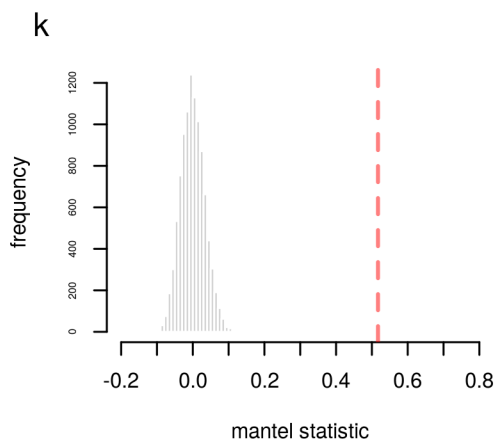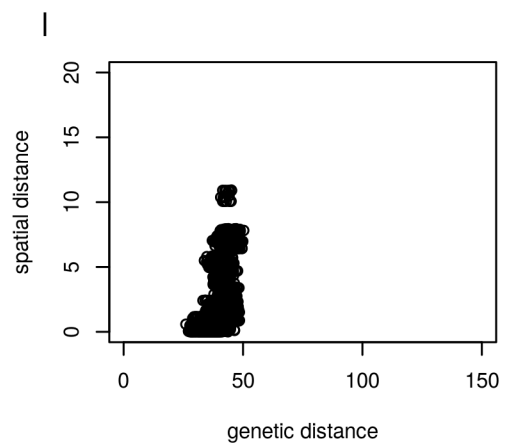

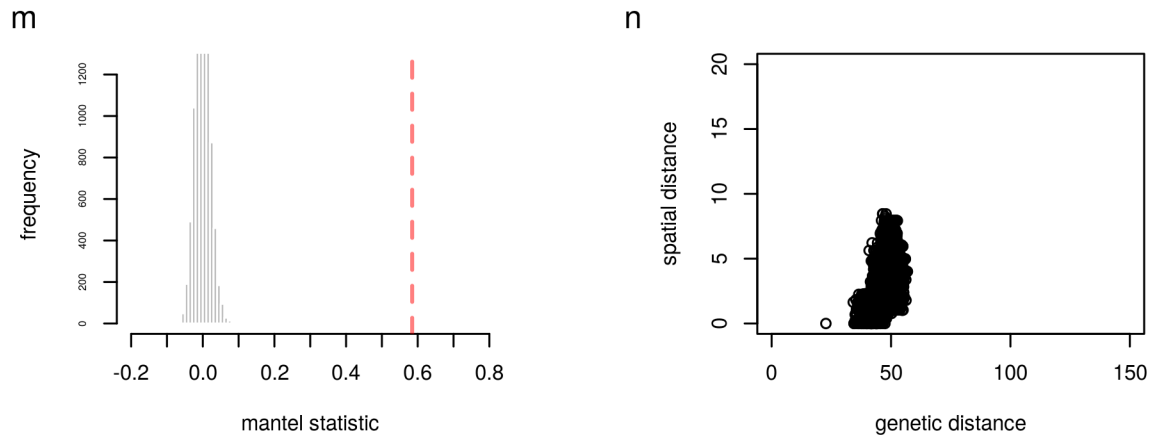

**Fig. S1.** Mantel tests results for (a-b) *A. affinis*, (c-d) *A. manni*, (e-f) *G. suaveolens*, (g-h) *M. enghiana*, (i-j) *P. acaulis*, (k-l) *P. barteri* and (m-n) *S. manni*. Panels on the left show histograms of 9999 random permutations and the observed value as a dashed red line. Panels on the right show plots of genetic distance vs spatial distance.





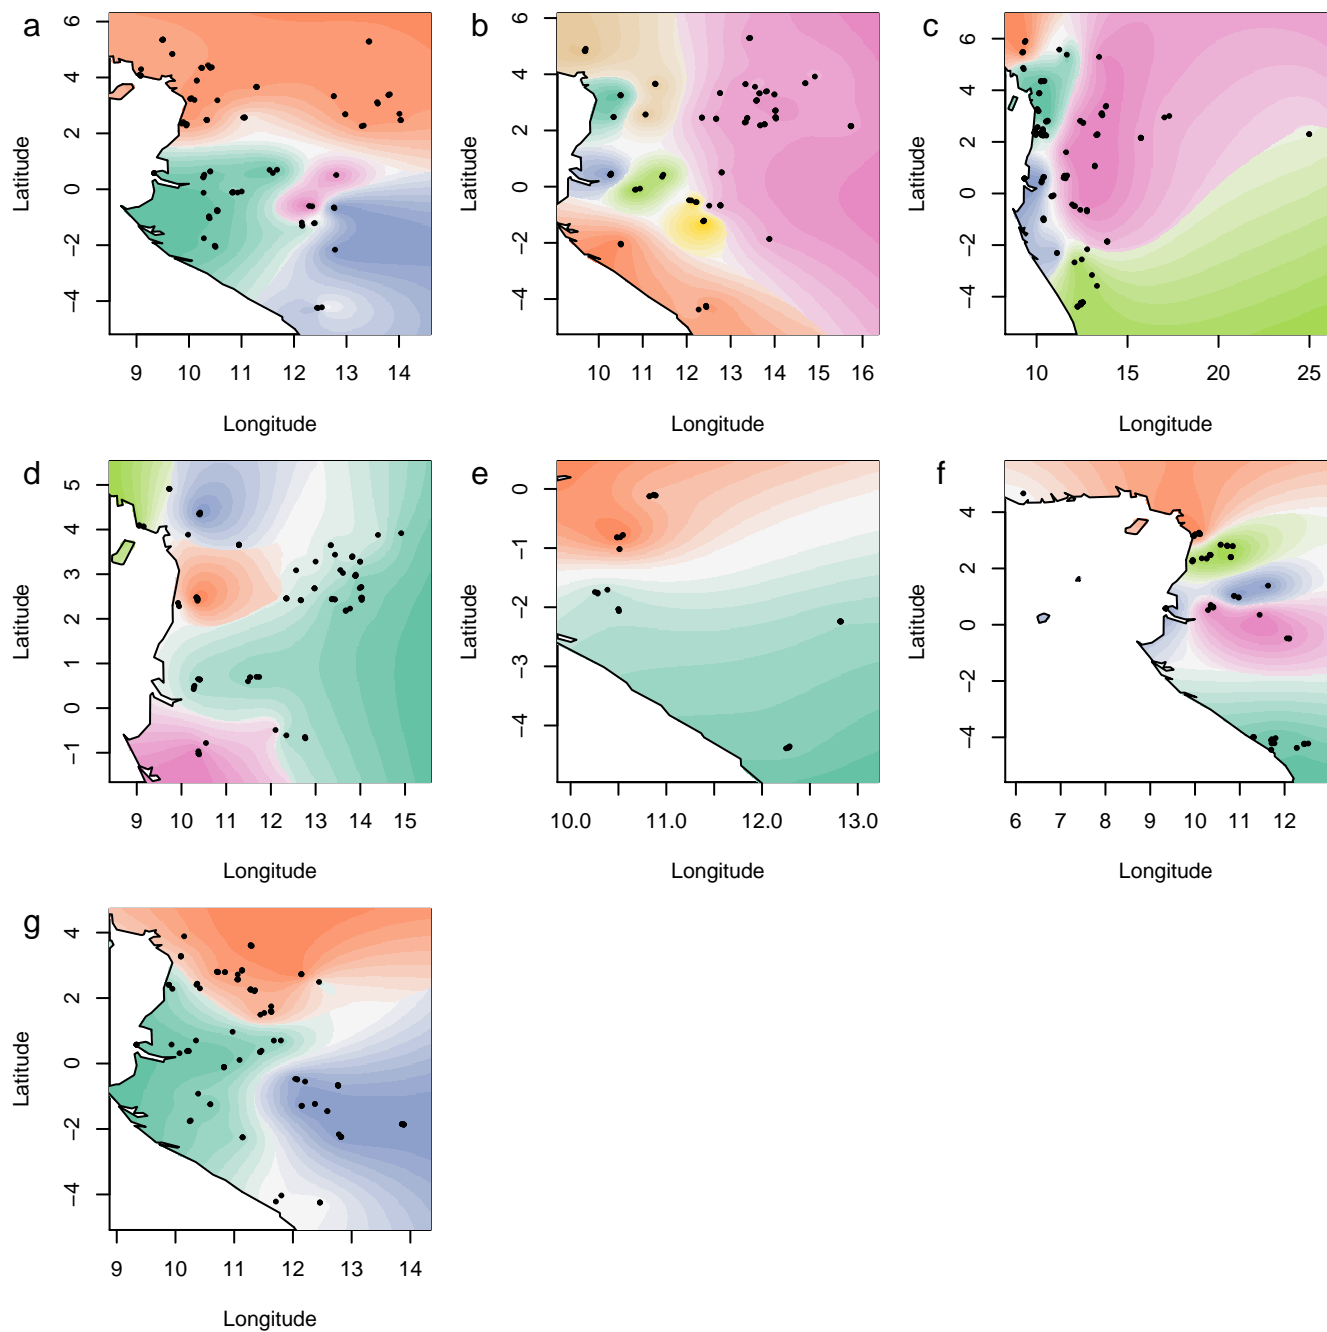

**Fig. S2.** Maps depicting genetic clusters inferred from the TESS3 analysis for (a) *Annickia affinis*, (b) *Anonidium mannii*, (c) *Greenwayodendron suaveolens*, (d) *Monanthataxis enghiana*, (e) *Podococcus acaulis*, (f) *Podococcus barteri* and (g) *Sclerosperma mannii*. This approach takes into account geographic information as well as genetic data. Black points represent locations of individuals. Interpolated values of ancestry coefficients are displayed for clusters inferred and the color gradient corresponds to the level of ancestry.

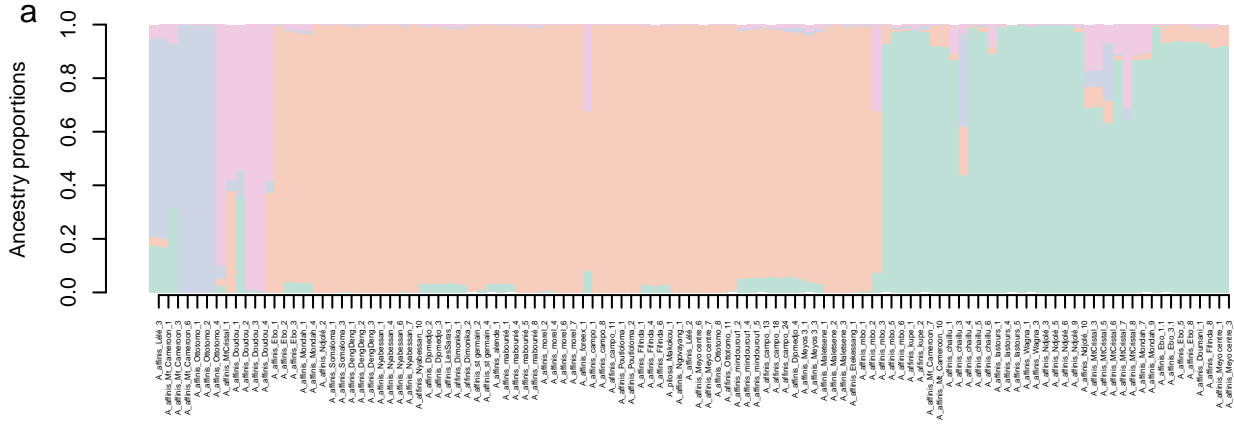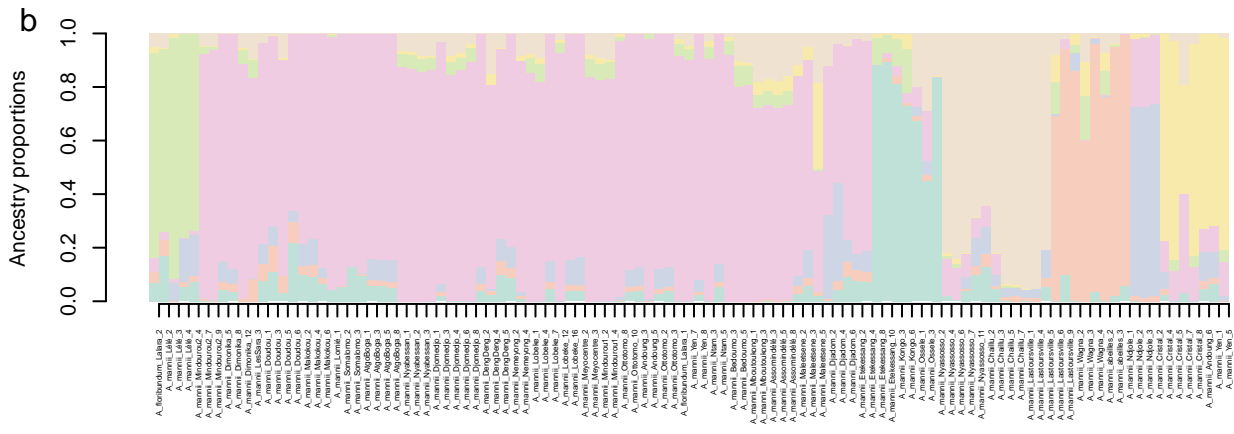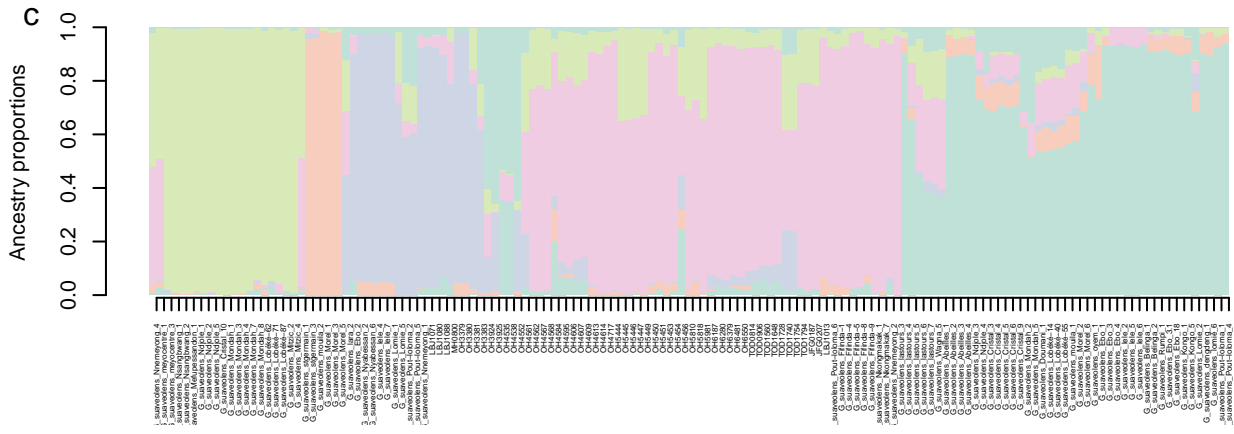

**a**  
Ancestry proportions

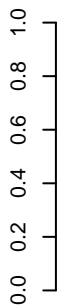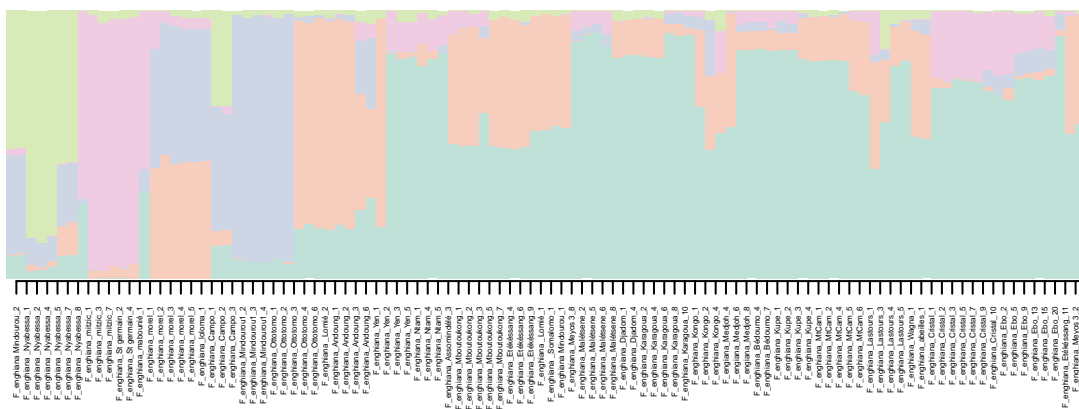

**b**  
Ancestry proportions

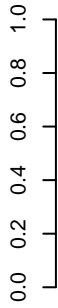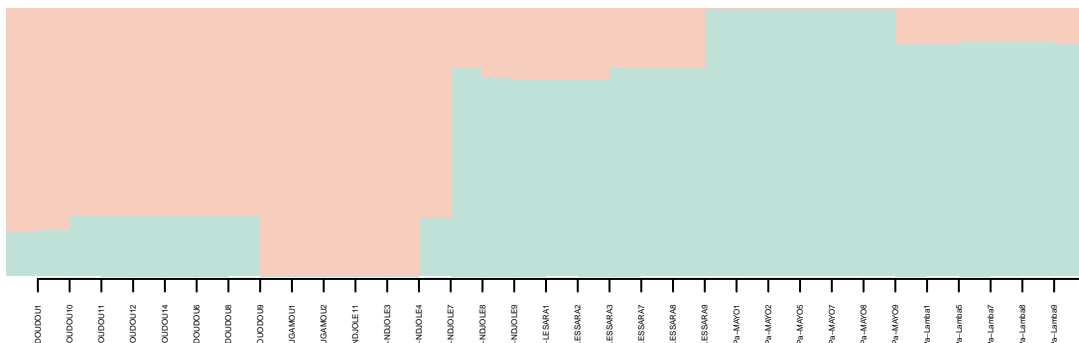

**c**  
Ancestry proportions

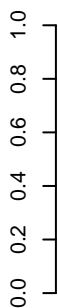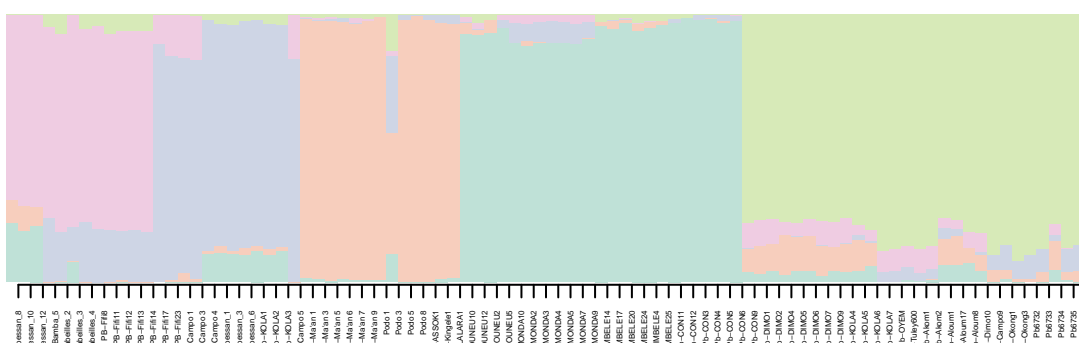

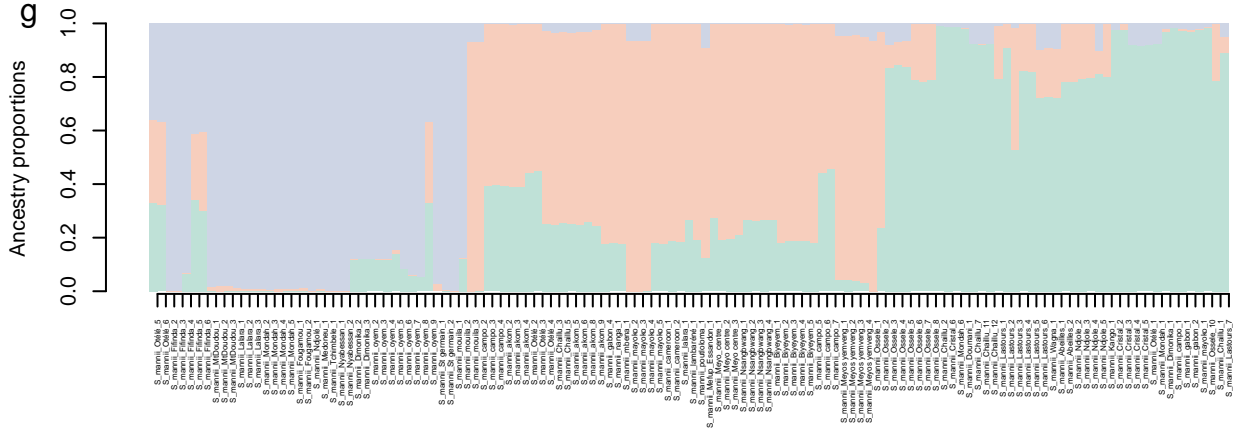

**Fig. S3.** Barplot of ancestry proportions inferred using TESS3 for (a) *Annickia affinis*, (b) *Anonidium mannii*, (c) *Greenwayodendron suaveolens*, (d) *Monanthonotaxis enghiana*, (e) *Podococcus acaulis*, (f) *Podococcus barteri* and (g) *Sclerosperma mannii*. Number of genetic clusters was chosen for each species using the cross-validation store.

38 **Clustering sensitivity**

39 DAPC analyses were presented based on values of K selected based on BIC. Here we present DAPC results for other values of  
40 K (from 2-8) for each species. This was to determine whether changing values of K might lead to similar patterns of population  
41 genetic structure across species. Instead we find that structure is generally idiosyncratic, and this does not change as the  
42 number of clusters increases.

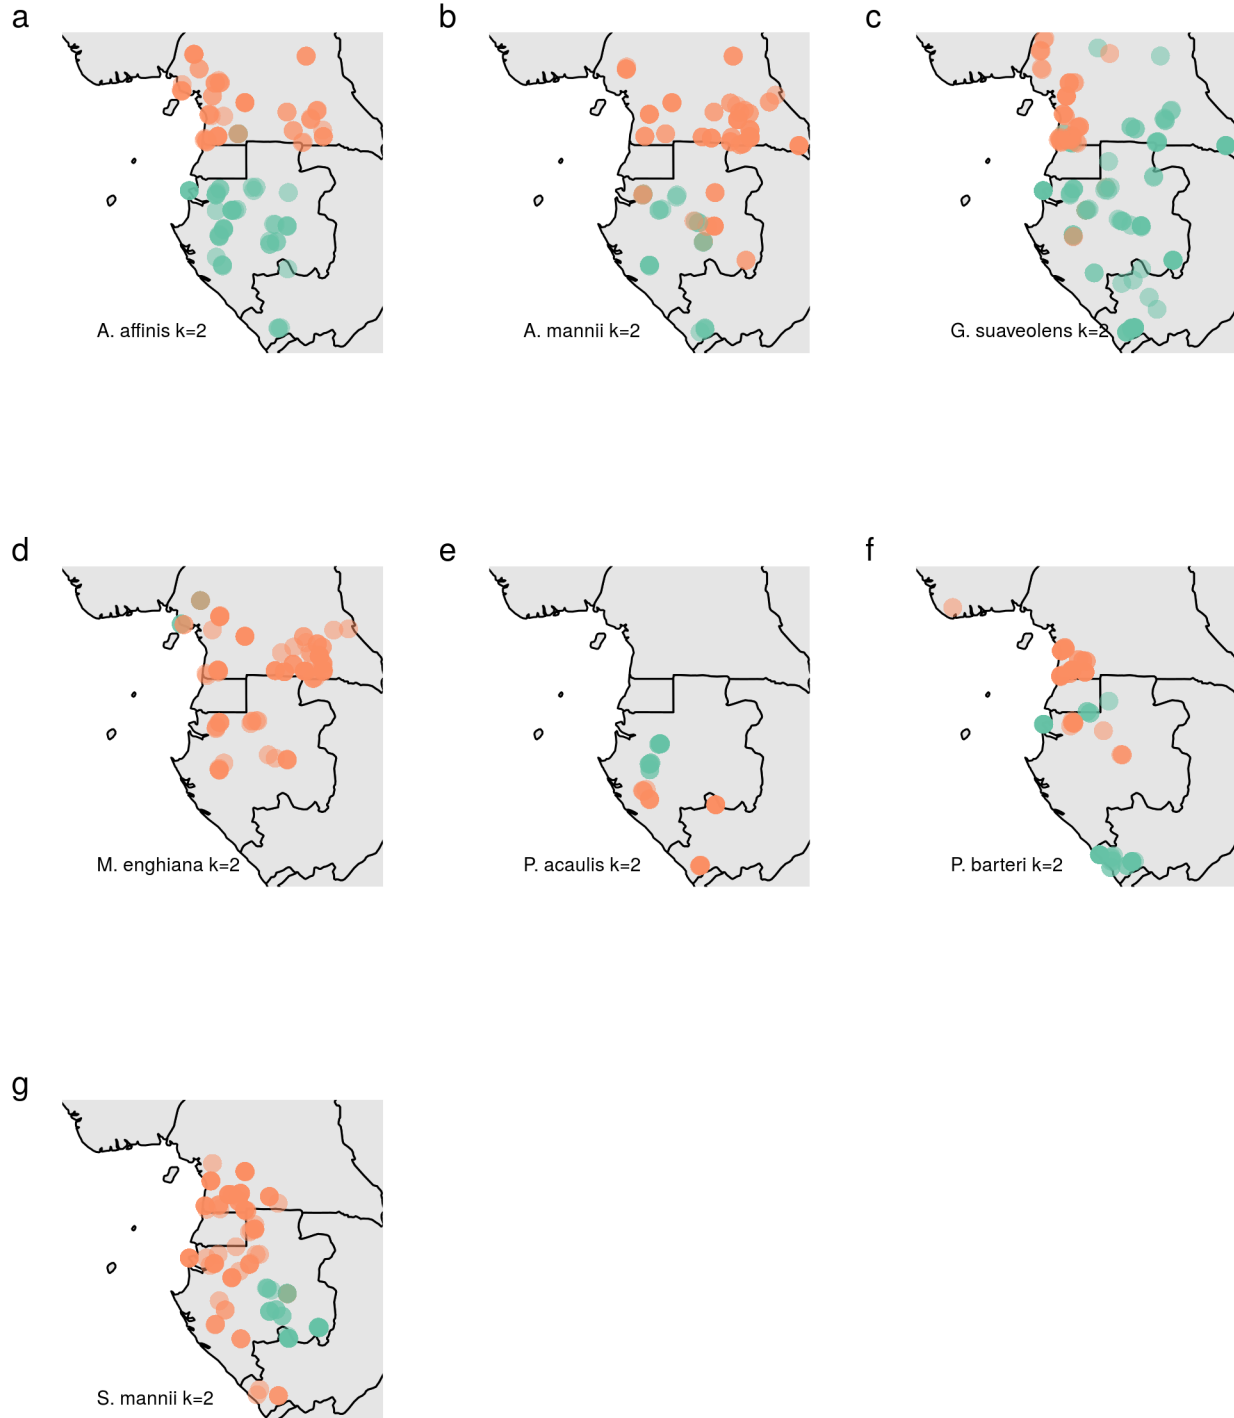

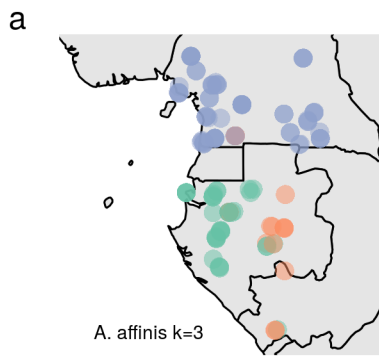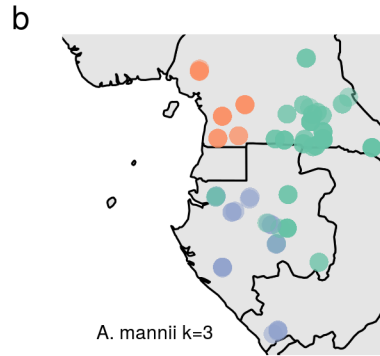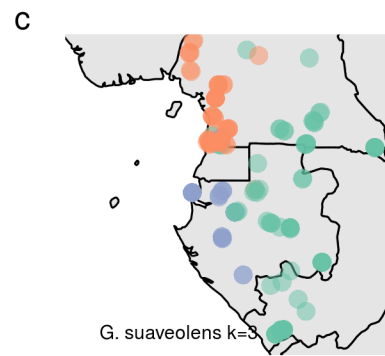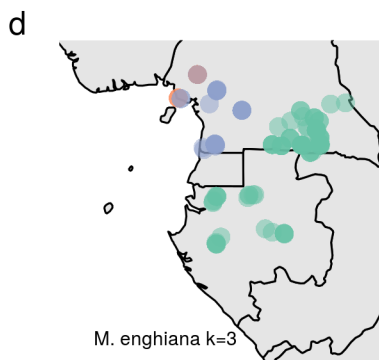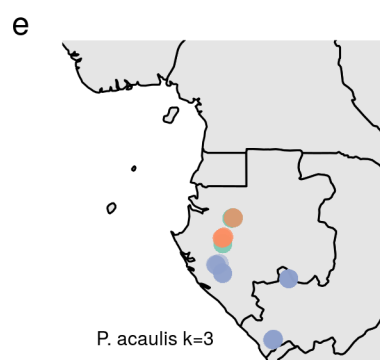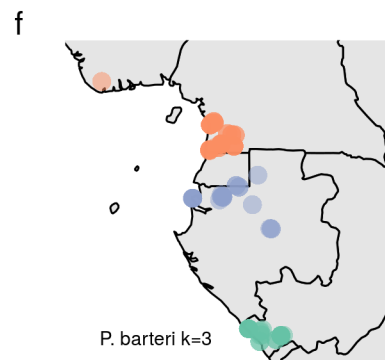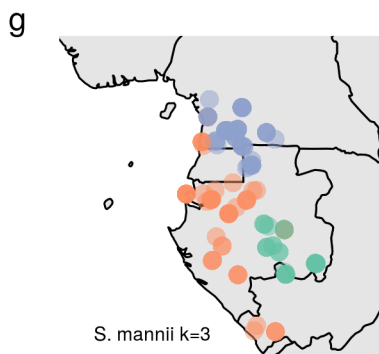

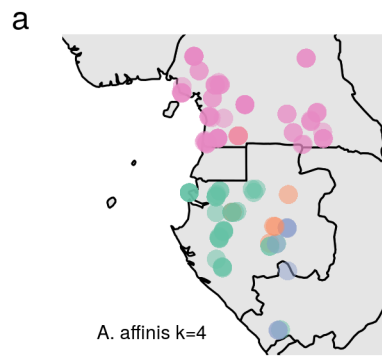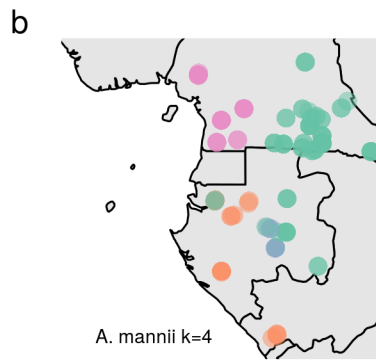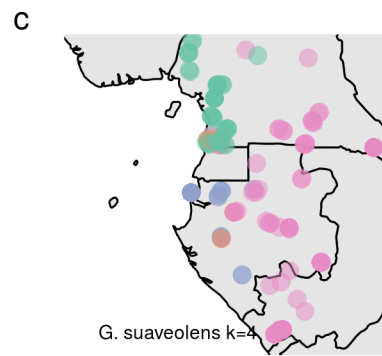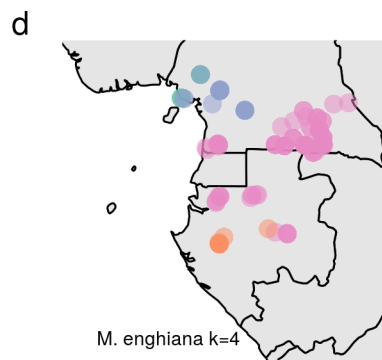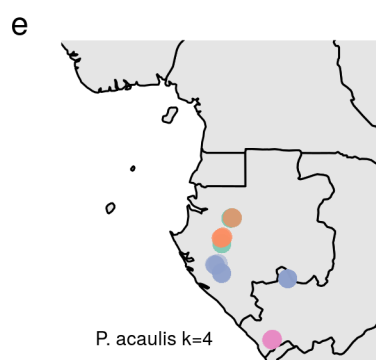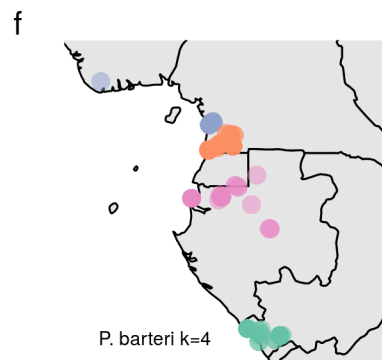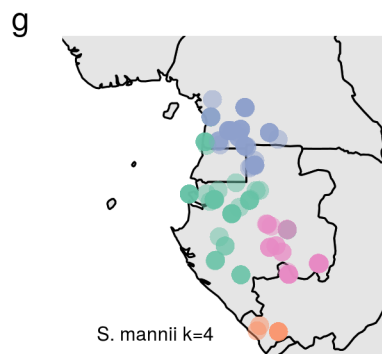



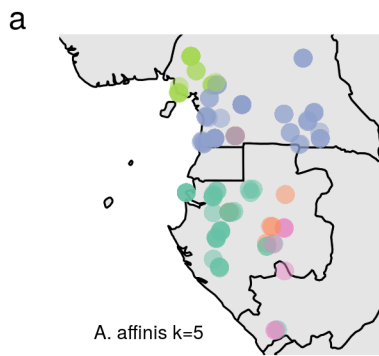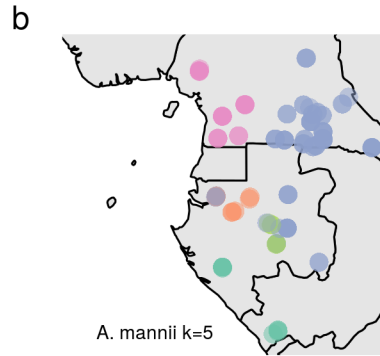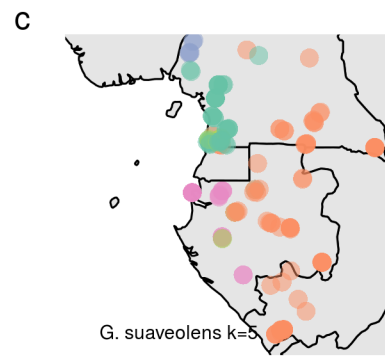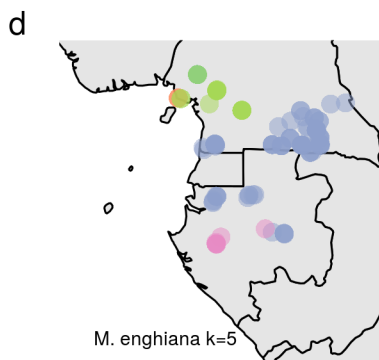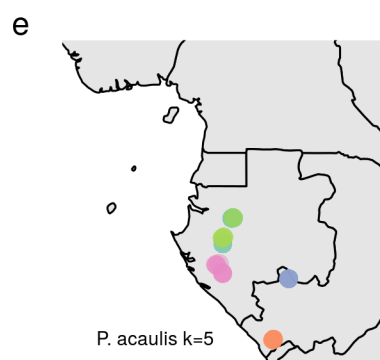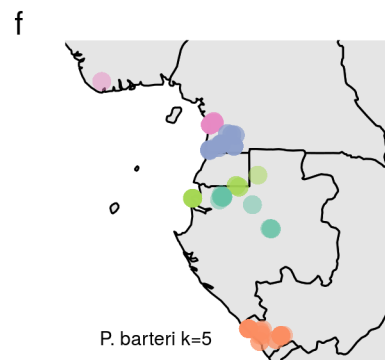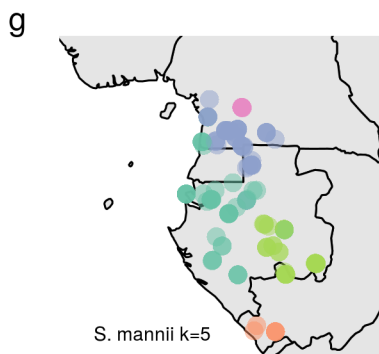

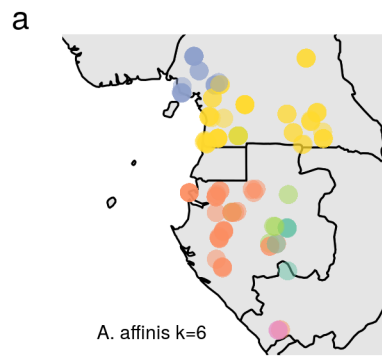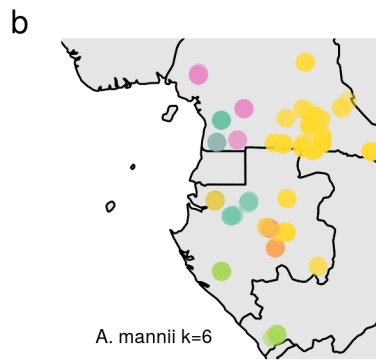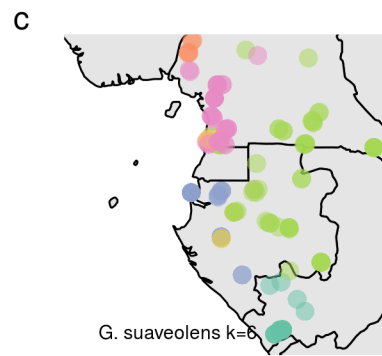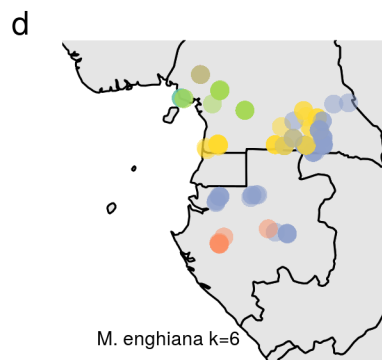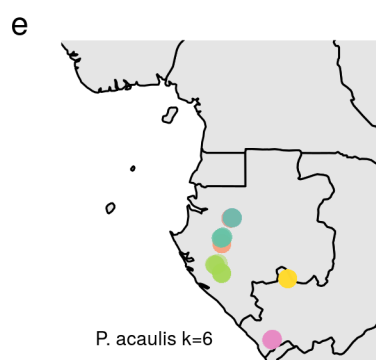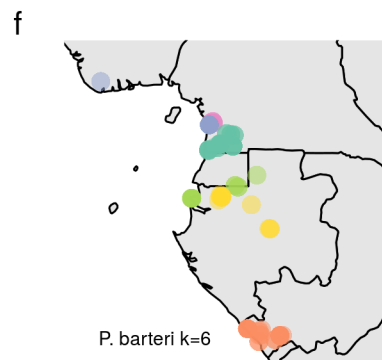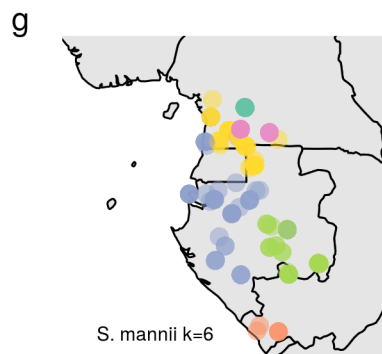

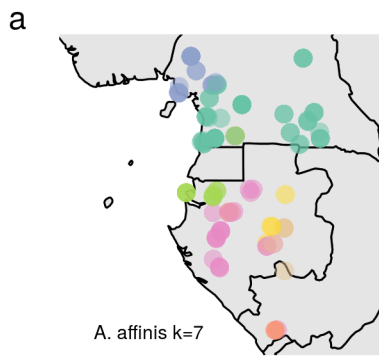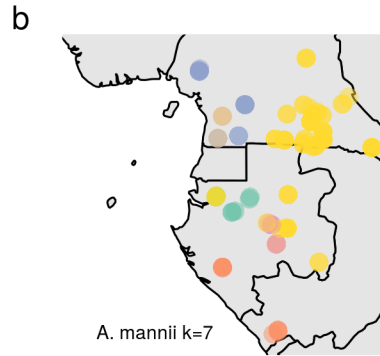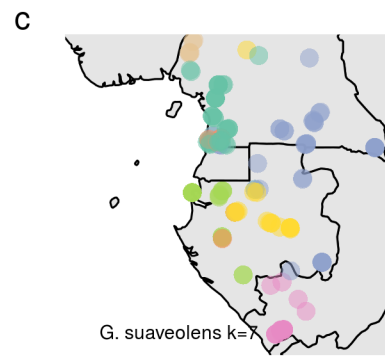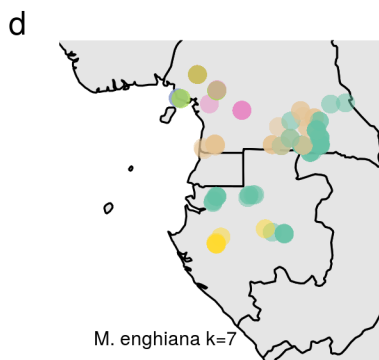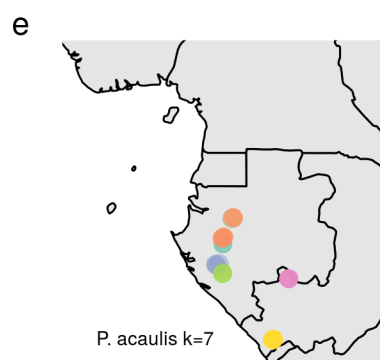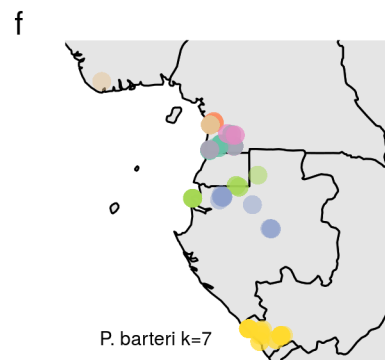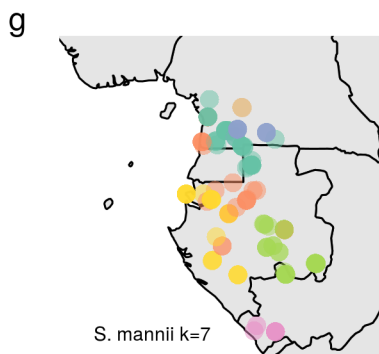

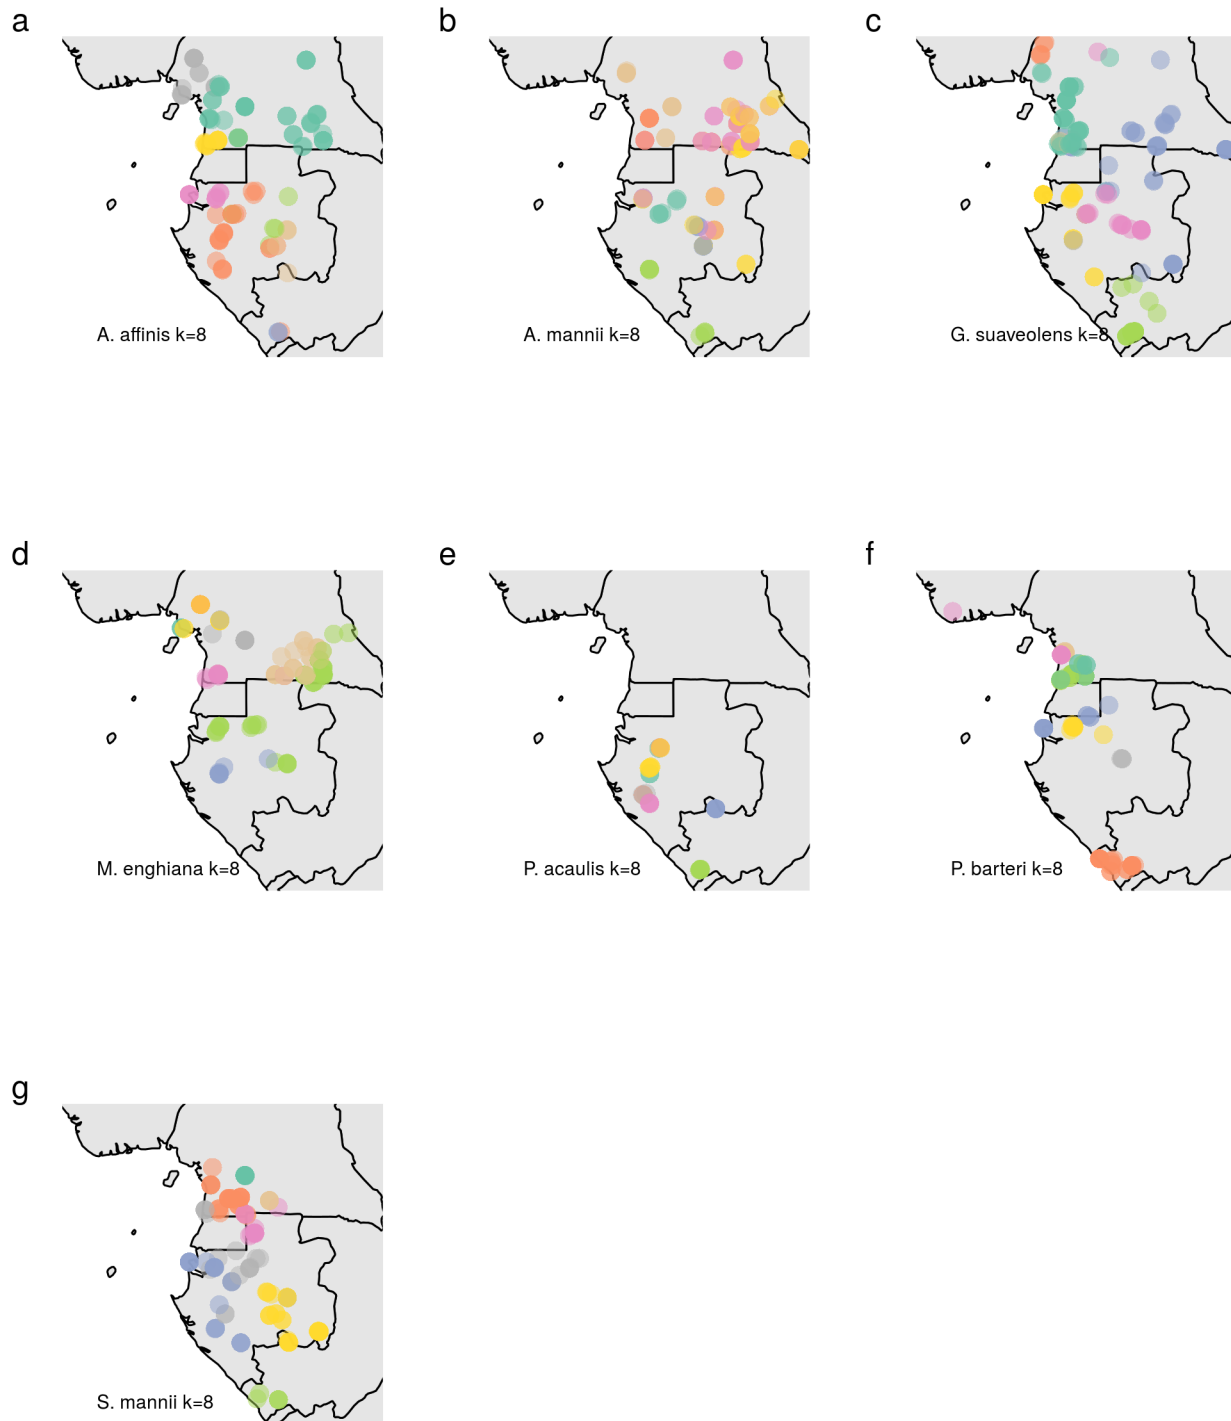

**Fig. S4.** Assessment of sensitivity of DAPC analyses. We ran DAPC analyses for values of  $k$  from 2 (minimum  $K$  inferred) to 8 (maximum  $K$  inferred) for each species. Analyses were run as detailed in the materials and methods section. Sets of maps are shown for each value of  $K$ , and individuals are colored by cluster membership. The name of the species and the value of  $K$  are shown in the bottom left of each plot.

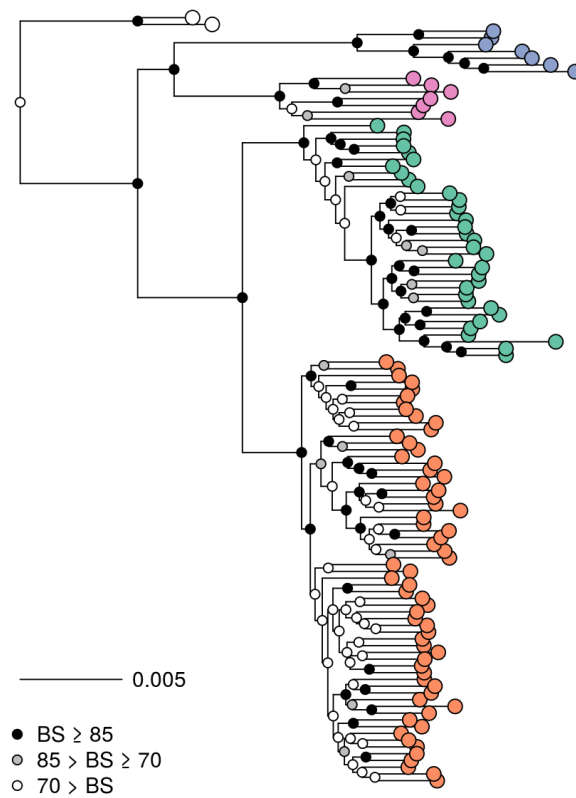

**Fig. S5.** Maximum likelihood phylogenetic tree of *A. affinis*. Colours on tips correspond to inferred DAPC clusters. Tips with white circles are outgroup taxa. Circles at nodes represent confidence in the preceding branch and show the results of 100 bootstraps inferred using RAxML.

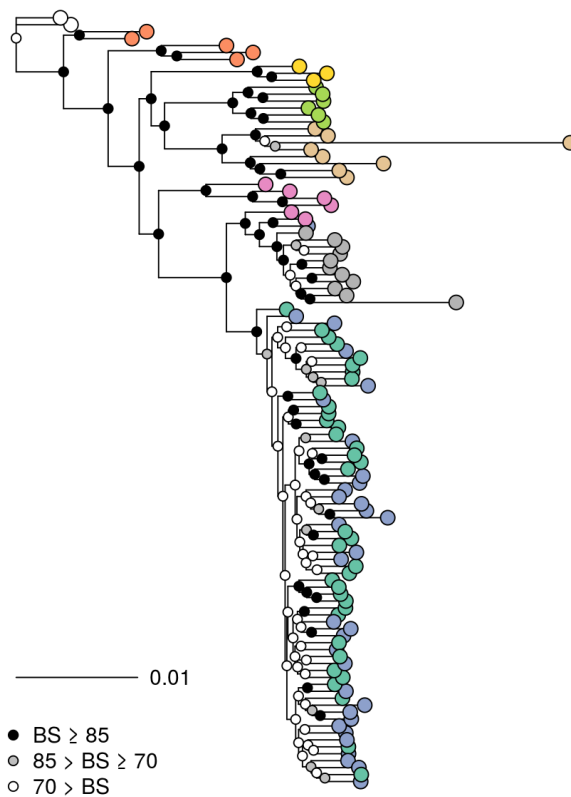

**Fig. S6.** Maximum likelihood phylogenetic tree of *A. manni*. Colours on tips correspond to inferred DAPC clusters. Tips with white circles are outgroup taxa. Circles at nodes represent confidence in the preceding branch and show the results of 100 bootstraps inferred using RAxML.

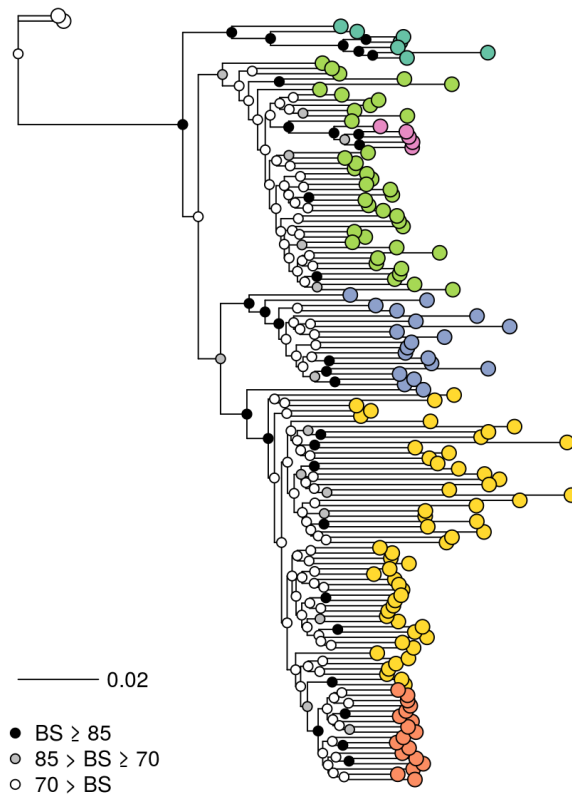

**Fig. S7.** Maximum likelihood phylogenetic tree of *G. suaveolens*. Colours on tips correspond to inferred DAPC clusters. Tips with white circles are outgroup taxa. Circles at nodes represent confidence in the preceding branch and show the results of 100 bootstraps inferred using RAxML.

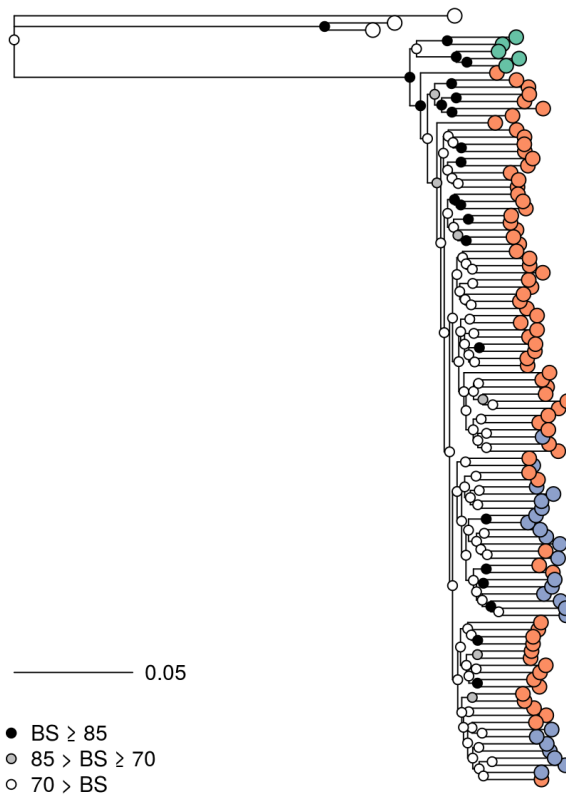

**Fig. S8.** Maximum likelihood phylogenetic tree of *M. enghiana*. Colours on tips correspond to inferred DAPC clusters. Tips with white circles are outgroup taxa. Circles at nodes represent confidence in the preceding branch and show the results of 100 bootstraps inferred using RAxML.



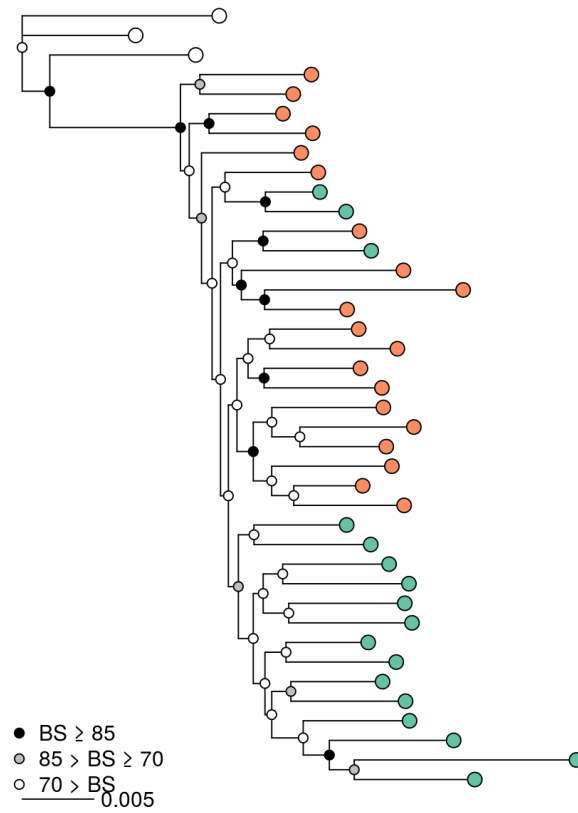

**Fig. S9.** Maximum likelihood phylogenetic tree of *P. acaulis*. Colours on tips correspond to inferred DAPC clusters. Tips with white circles are outgroup taxa. Circles at nodes represent confidence in the preceding branch and show the results of 100 bootstraps inferred using RAxML.

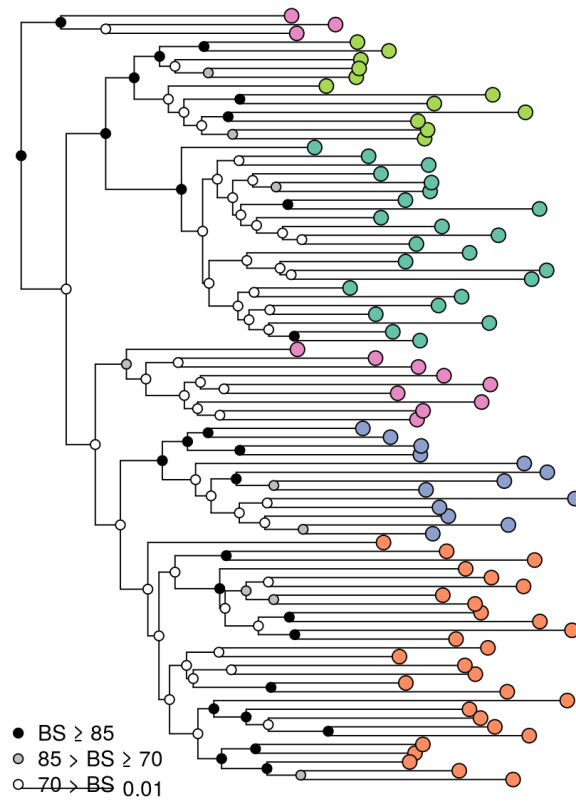

**Fig. S10.** Maximum likelihood phylogenetic tree of *P. barteri*. Colours on tips correspond to inferred DAPC clusters. Tips with white circles are outgroup taxa. Circles at nodes represent confidence in the preceding branch and show the results of 100 bootstraps inferred using RAxML.

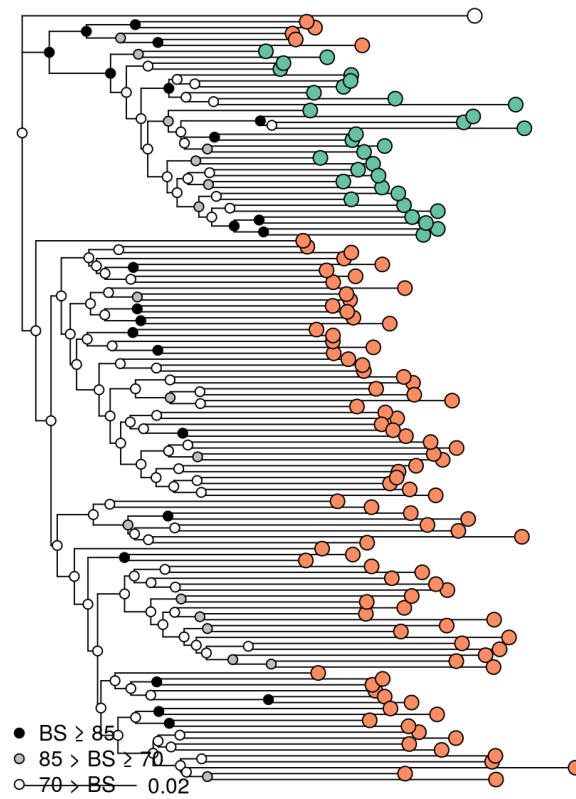

**Fig. S11.** Maximum likelihood phylogenetic tree of *S. manni*. Colours on tips correspond to inferred DAPC clusters. Tips with white circles are outgroup taxa. Circles at nodes represent confidence in the preceding branch and show the results of 100 bootstraps inferred using RAxML.

#### 44 Genetic diversity and putative refugia

45 One of our predictions (Table 1) is that the stability of refugial areas may lead to the accumulation of genetic diversity over  
46 time when compared to areas outside of refugia. Rapid expansion during interglacial periods would likely lead to low levels  
47 of diversity in newly (re)colonised areas, due to founder effects. We examined the feasibility of this hypothesis in central  
48 African rain forests by performing regressions on three different measures of individual-level expected heterozygosity ( $H_e$ ),  
49 observed heterozygosity ( $H_o$ ) and allelic richness. We compared these metrics of diversity to distance from either Maley's (2) or  
50 Anhof's (3) refugia (see Fig. 1 in the main text). In the first instance we calculated the distance from each individual to the  
51 approximate central point of the nearest of Maley's refugia. In the second instance we calculated the distance from the coast  
52 (representing Anhof's hypothesis of coastal refugia) for each individual and plotted this against genetic diversity. Two species  
53 (*G. sauveolens* and *P. barteri*) had conspicuous outliers that we identified using the *boxplot* function in R and removed from  
54 the dataset. We performed regression analyses for each species and diversity statistic, fitting linear models for each variable  
55 independently. We also log-transformed variables to account for any non-normality in our data and found extremely similar  
56 patterns (see Dryad repository for plots).

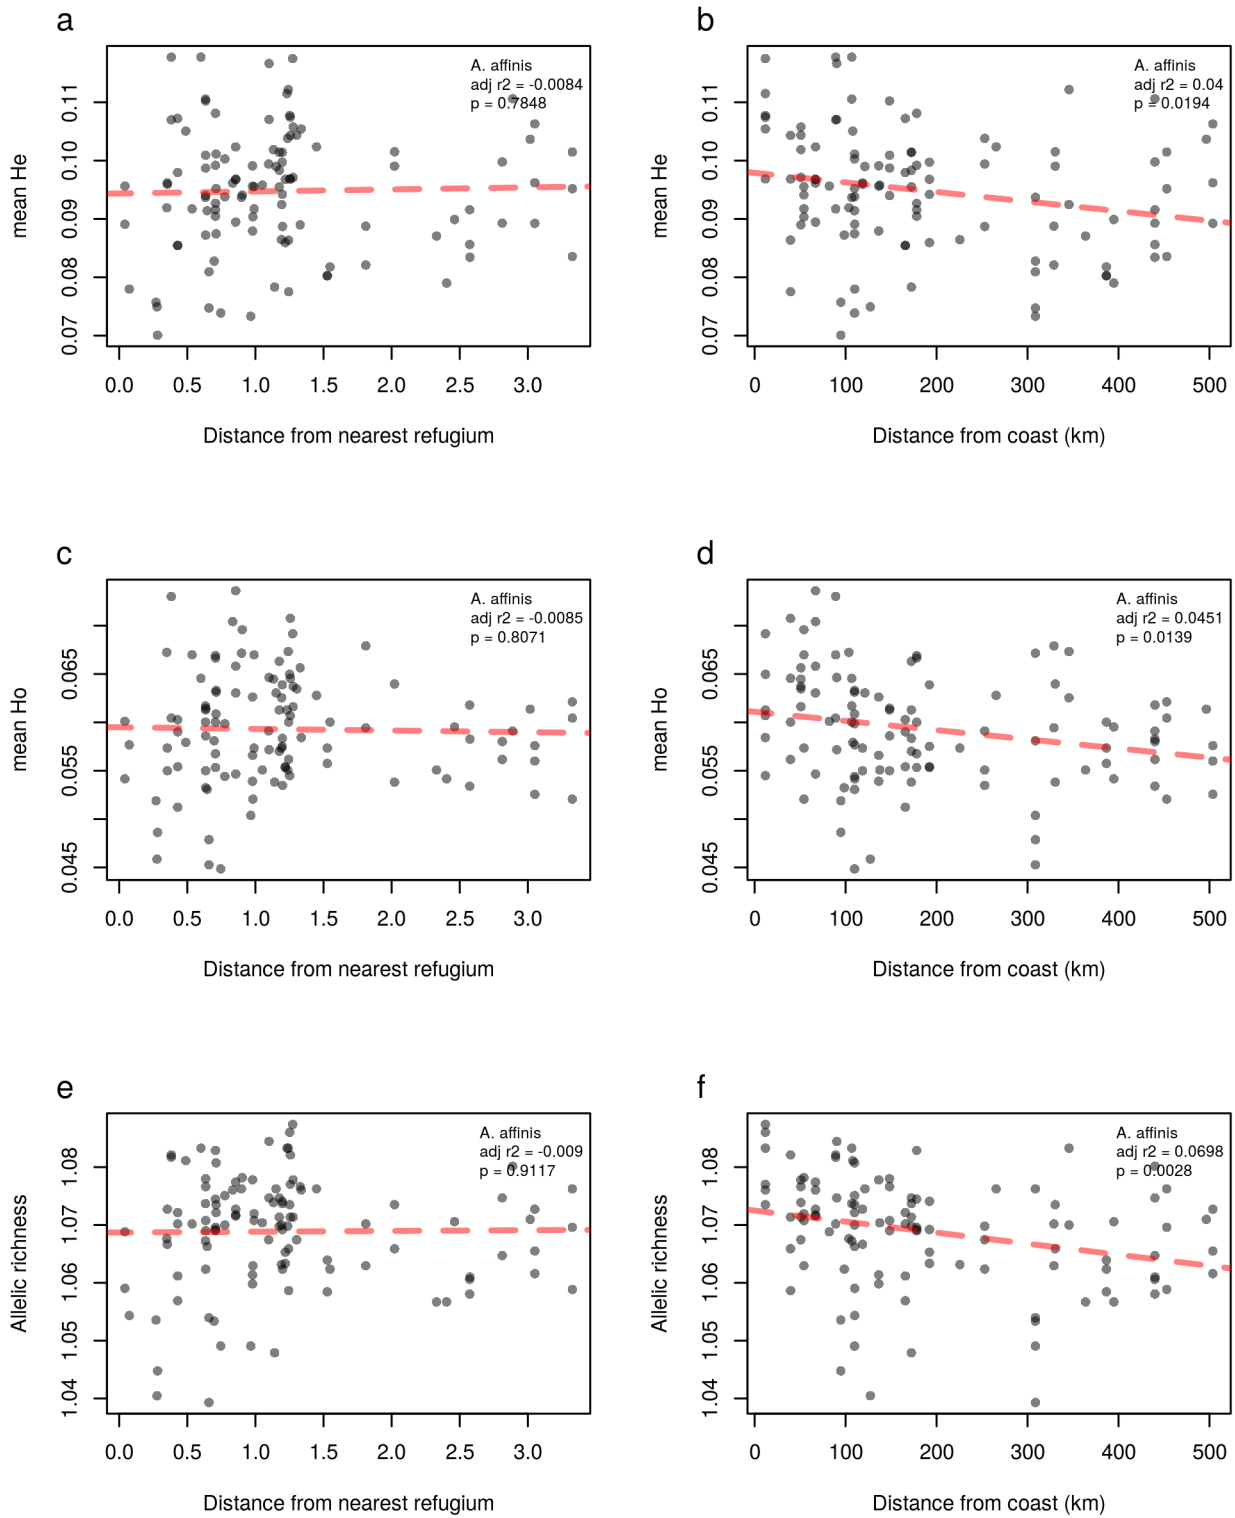

**Fig. S12.** Regressions of three different per-individual genetic diversity statistics ( $H_o$ ,  $H_e$  and allelic richness) against distance to nearest refugium (a,c,e) and distance from coast (b,d,f) for *A. affinis*. Species names, R-squared values and p values are shown on each plot. The dotted red line indicates the fitted line of the regression model.

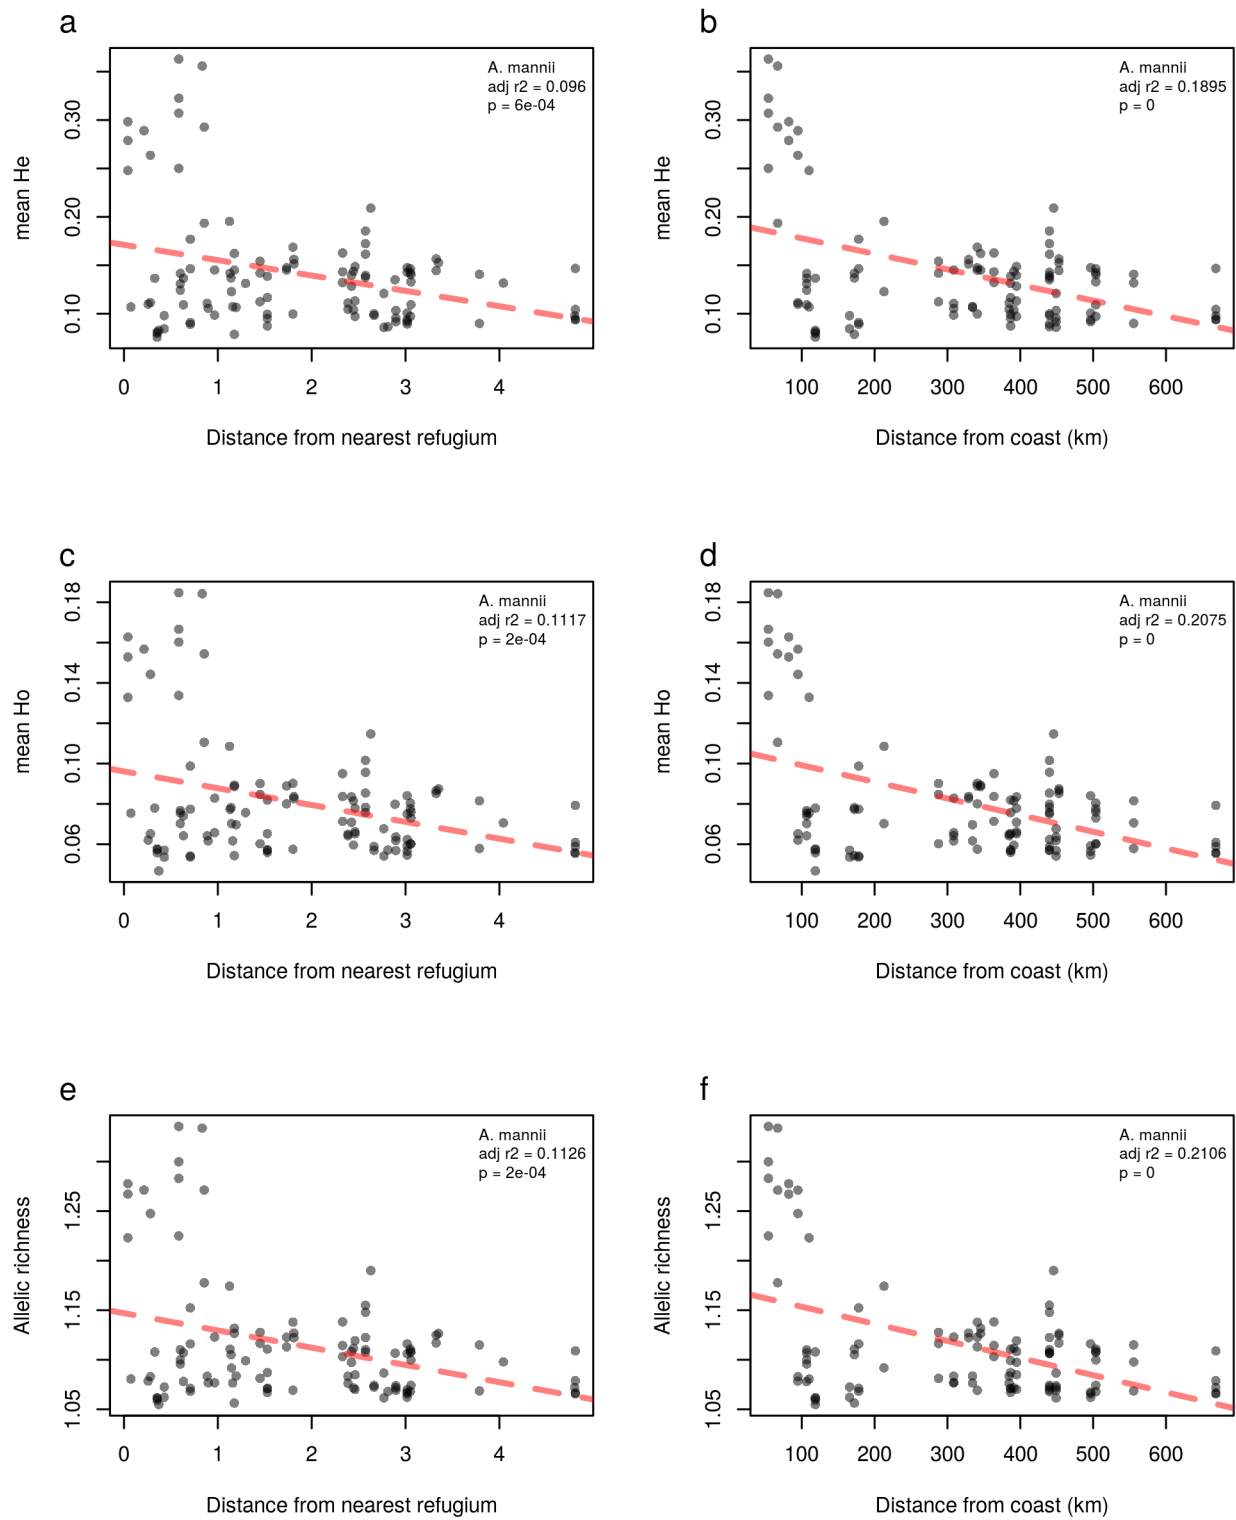

**Fig. S13.** Regressions of three different per-individual genetic diversity statistics ( $H_o$ ,  $H_e$  and allelic richness) against distance to nearest refugium (a,c,e) and distance from coast (b,d,f) for *A. mannii*. Species names, R-squared values and p values are shown on each plot. The dotted red line indicates the fitted line of the regression model.

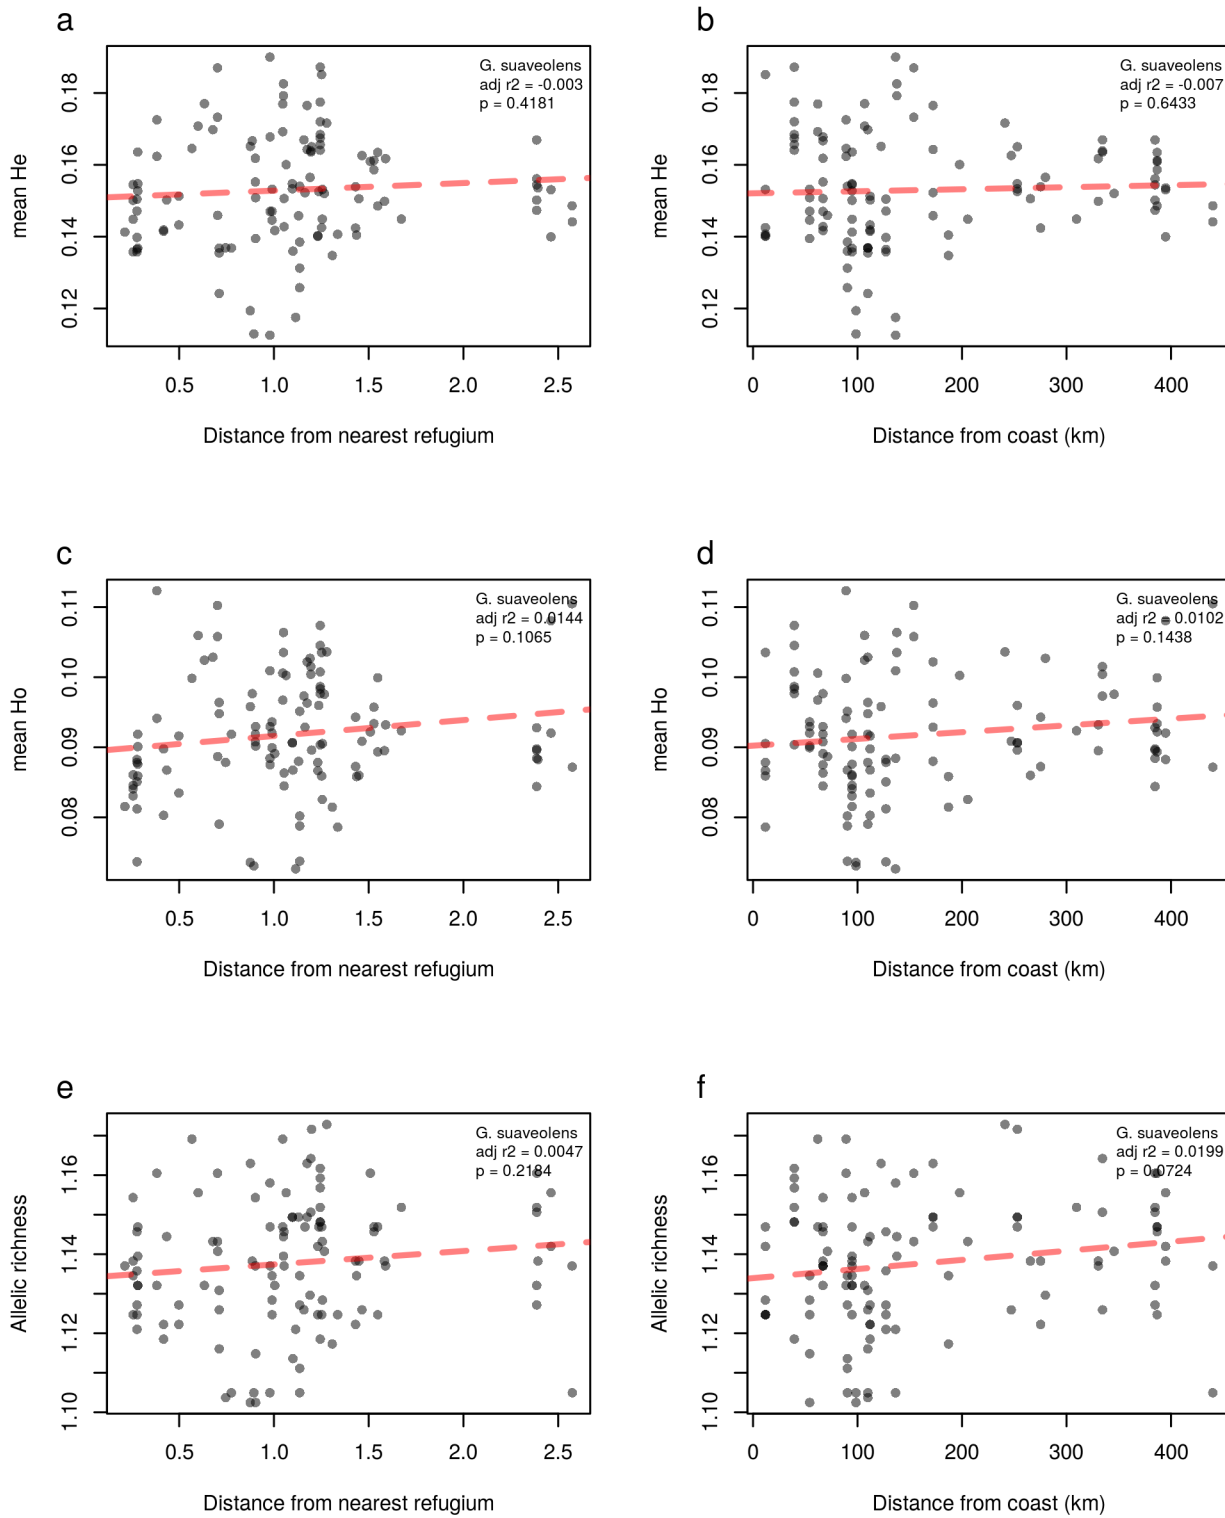

**Fig. S14.** Regressions of three different per-individual genetic diversity statistics (Ho, He and allelic richness) against distance to nearest refugium (a,c,e) and distance from coast (b,d,f) for *G. suaveolens*. Species names, R-squared values and p values are shown on each plot. The dotted red line indicates the fitted line of the regression model.

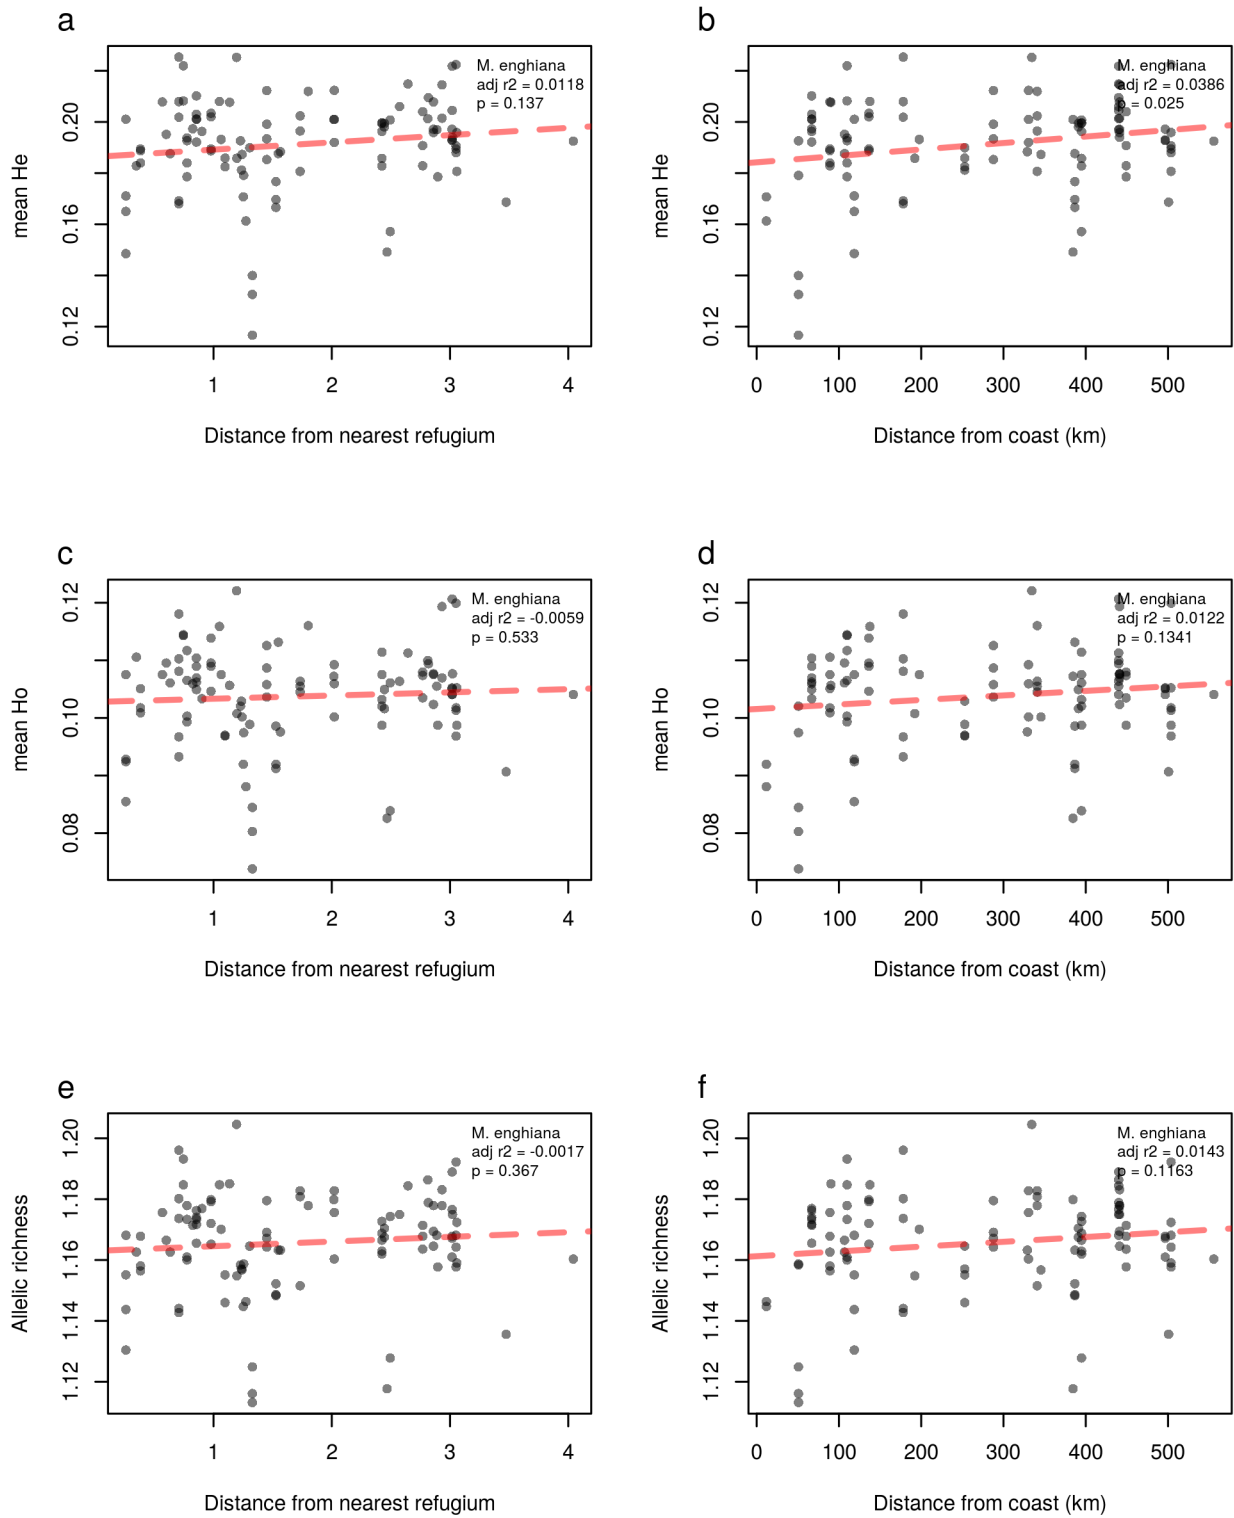

**Fig. S15.** Regressions of three different per-individual genetic diversity statistics ( $H_o$ ,  $H_e$  and allelic richness) against distance to nearest refugium (a,c,e) and distance from coast (b,d,f) for *M. enghiana*. Species names, R-squared values and p values are shown on each plot. The dotted red line indicates the fitted line of the regression model.



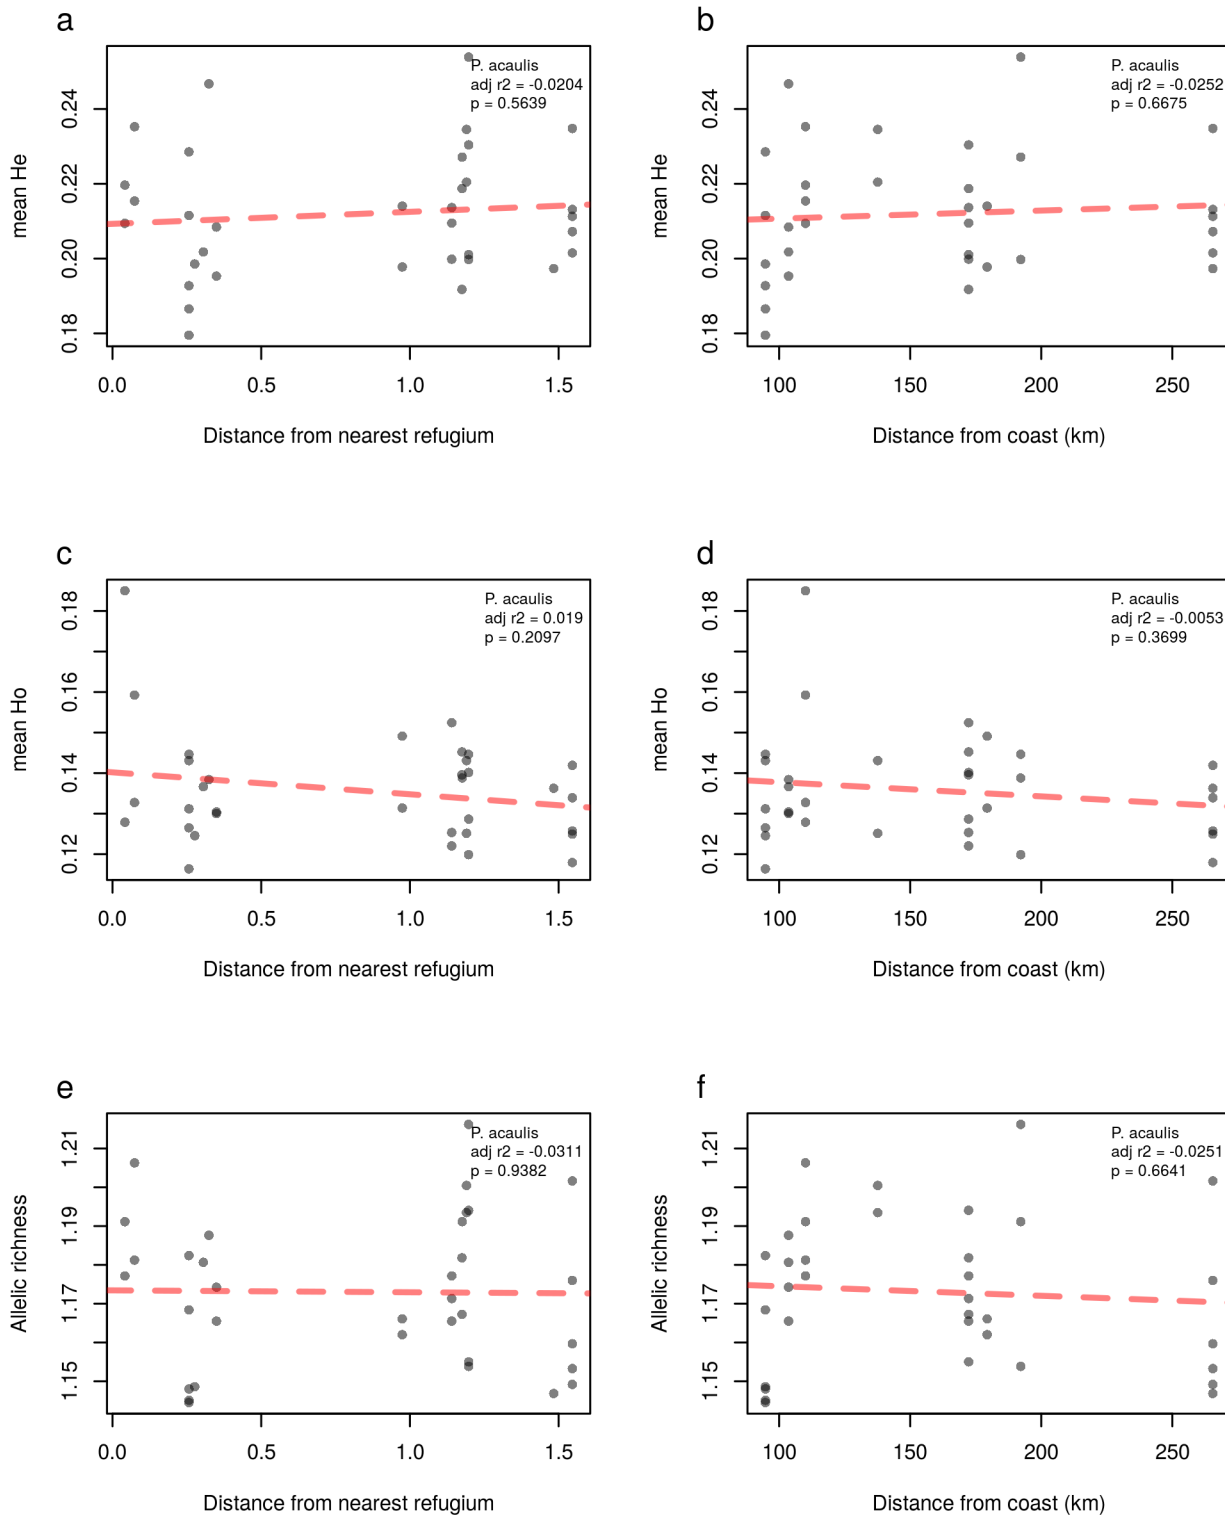

**Fig. S16.** Regressions of three different per-individual genetic diversity statistics (Ho, He and allelic richness) against distance to nearest refugium (a-c) and distance from coast (d-f) for *P. acaulis*. Species names, R-squared values and p values are shown on each plot. The dotted red line indicates the fitted line of the regression model.

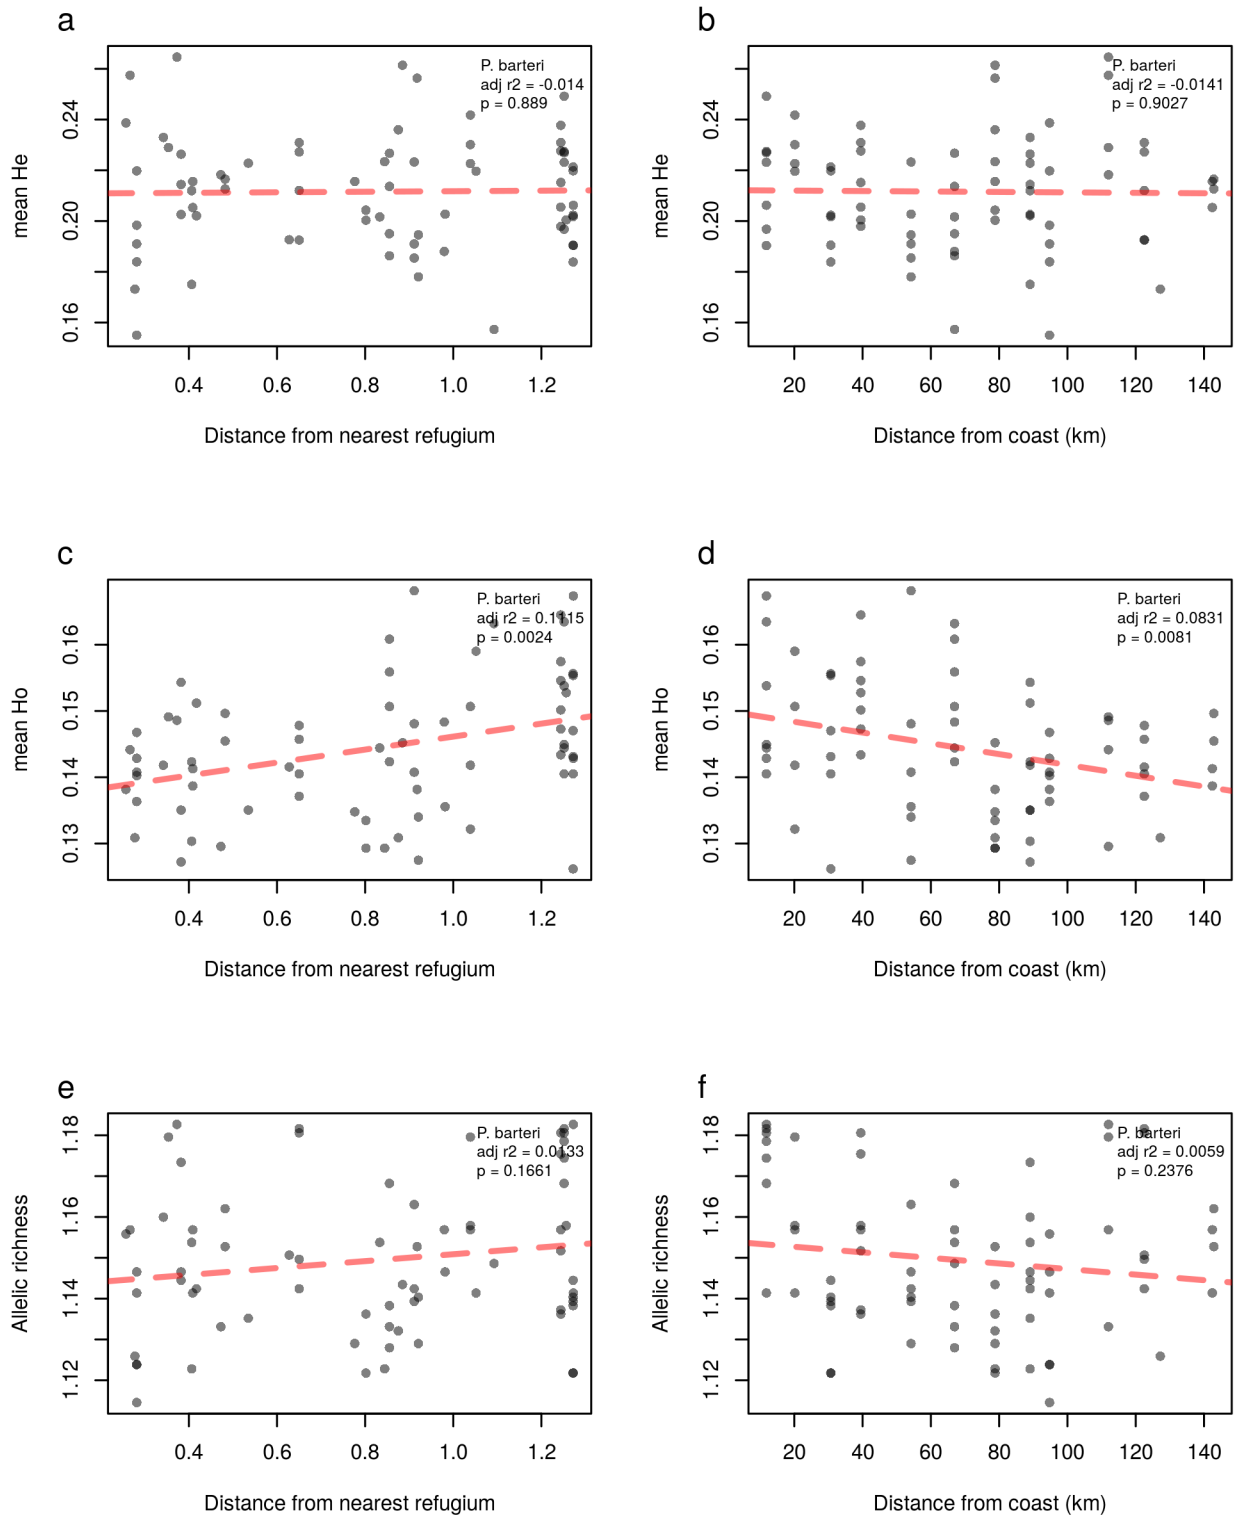

**Fig. S17.** Regressions of three different per-individual genetic diversity statistics ( $H_o$ ,  $H_e$  and allelic richness) against distance to nearest refugium (a-c) and distance from coast (d-f) for *P. barteri*. Species names, R-squared values and p values are shown on each plot. The dotted red line indicates the fitted line of the regression model.

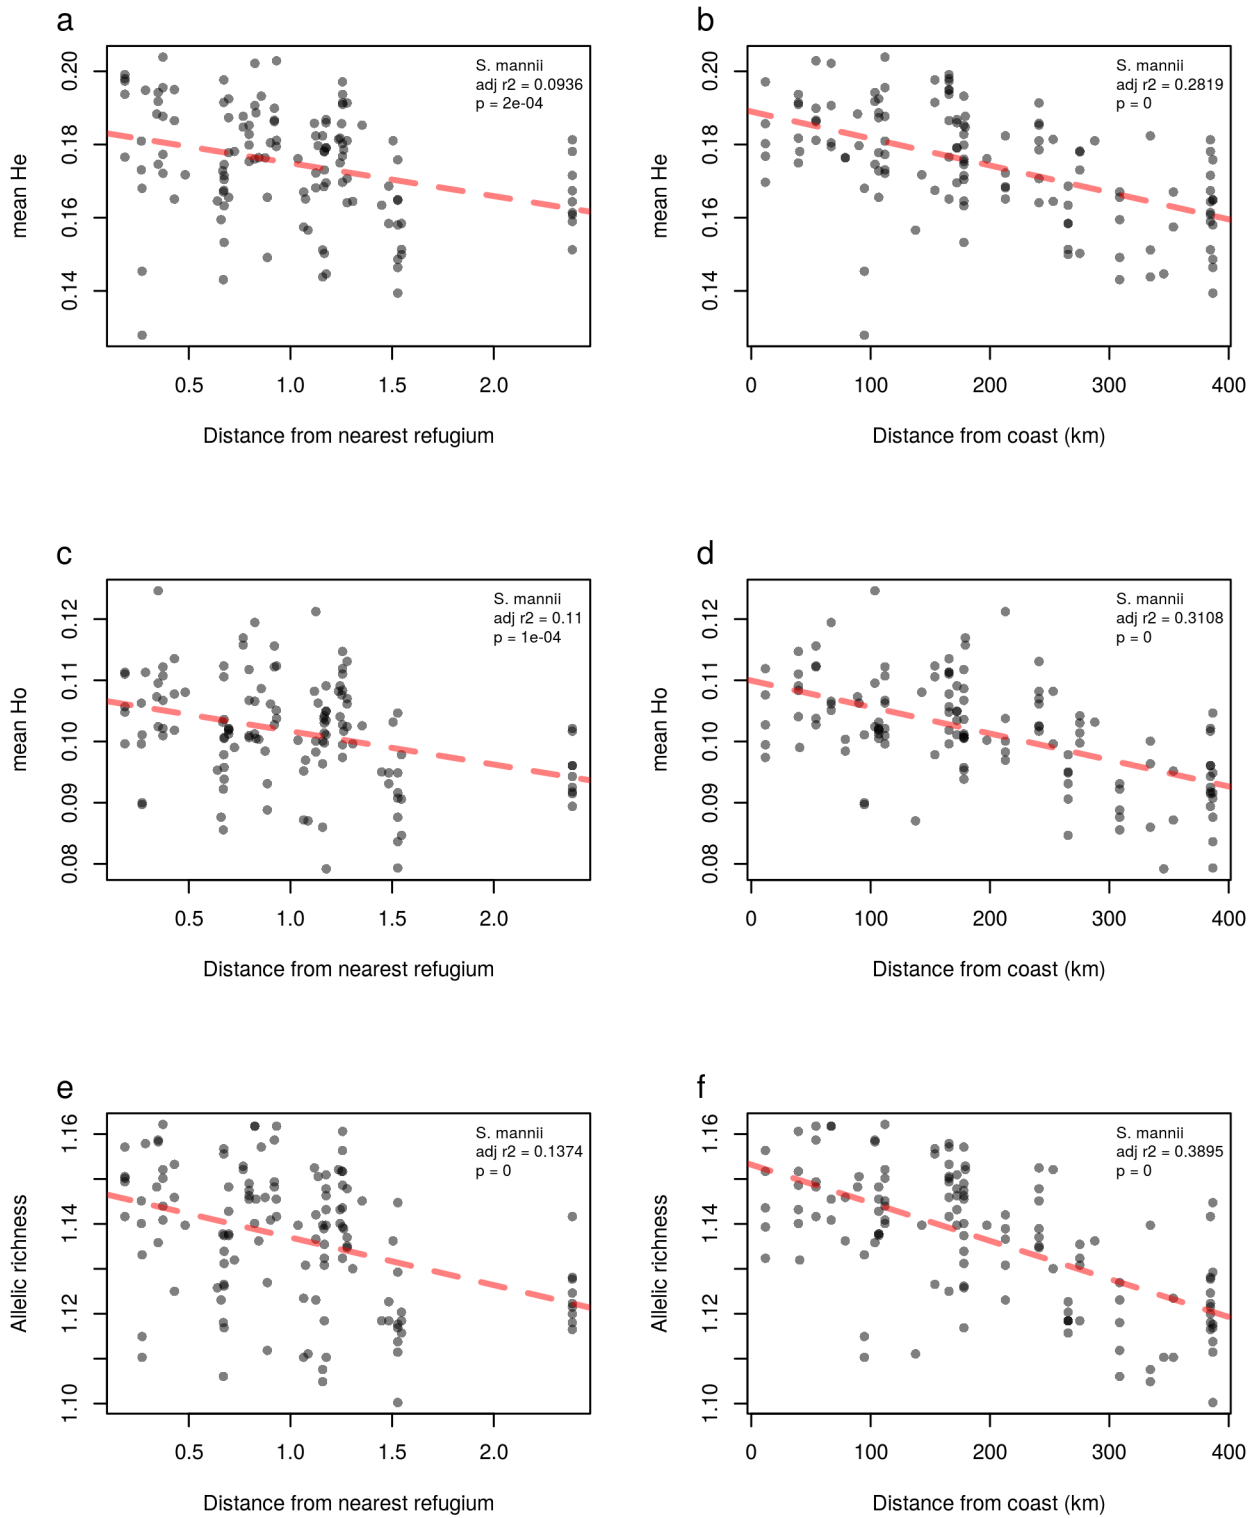

**Fig. S18.** Regressions of three different per-individual genetic diversity statistics ( $H_o$ ,  $H_e$  and allelic richness) against distance to nearest refugium (a-c) and distance from coast (d-f) for *S. mannii*. Species names, R-squared values and p values are shown on each plot. The dotted red line indicates the fitted line of the regression model.

57 **Analysis of MOlecular VAriance (AMOVA)**

58 The AMOVA approach is used to assess population differentiation using genetic markers (4). A pairwise genetic-distance matrix  
 59 is used to test how much genetic variation can be explained by a given stratification of the dataset. We used AMOVA to test  
 60 how much genetic variance could be explained by the North-South climatic inversion. Genetic clusters inferred from DAPC  
 61 were grouped based on whether they were north or south of the climatic inversion discontinuity at the climate inversion (where  
 62 the majority of its range was found). Then, each genetic cluster was considered as a second layer of structure, or subpopulation.  
 63 AMOVAs were performed using the *poppr.amova* function in the R package 'poppr' (5) and assessed significance by performing  
 64 999 randomisations, shuffling individual labels. We did not include within-individual variance in our models. We then repeated  
 65 our analysis, randomly shuffling population assignments in our dataset to calculate the significance of the population structure.

66 We also tested how much variance was explained by previously proposed glacial refugia or estimated areas of stability. We  
 67 split samples into two groups, those considered inside stable areas and those outside. We defined presence in Maley's refugia  
 68 using 1st quantile of distances from refugia in each dataset. Individuals closer than the 1st quantile distance were considered as  
 69 inside a stable area, and individuals further than this were considered outside stable areas. We took a similar approach for the  
 70 climate-based stable areas, using the difference between present and past climate at an individuals location instead of the  
 71 geographic distance from a point. We subtracted rasters of present-day climate values from past climate values (LGM; MIROC)  
 72 for annual mean temperature (bio1) and annual mean rainfall (bio12). We rescaled both variables to have a mean of 1, then  
 73 added them together to produce a raster where smaller values indicated stability through time. This approach gives equal  
 74 weight to rainfall and temperature variability. Finally, we used the binary presence-absence maps output in our ecological niche  
 75 modelling (ENM) analyses to split individuals into groups for the ENM-based stable areas. We followed the same approach as  
 76 detailed above, but did not include genetic cluster as a subpopulation layer of structure.

| test                                        | sp     | sigma   | percentage | p    |
|---------------------------------------------|--------|---------|------------|------|
| Variation between North/South               | anni   | -506.71 | -59.74     | 0.00 |
| Variation among clusters within North/South | anni   | 1123.22 | 132.42     | 0.00 |
| Variation within clusters                   | anni   | 231.70  | 27.32      | 0.75 |
| Variation between North/South               | anon   | 303.49  | 43.45      | 0.00 |
| Variation among clusters within North/South | anon   | 226.36  | 32.41      | 0.00 |
| Variation within clusters                   | anon   | 168.67  | 24.15      | 0.00 |
| Variation between North/South               | green  | 12.34   | 2.26       | 0.01 |
| Variation among clusters within North/South | green  | 9.23    | 1.69       | 0.08 |
| Variation within clusters                   | green  | 524.50  | 96.05      | 0.21 |
| Variation between North/South               | mona   | -112.90 | -41.63     | 0.00 |
| Variation among clusters within North/South | mona   | 169.69  | 62.58      | 0.00 |
| Variation within clusters                   | mona   | 214.38  | 79.06      | 0.66 |
| Variation between North/South               | podo_b | 14.82   | 11.00      | 0.00 |
| Variation among clusters within North/South | podo_b | 37.98   | 28.17      | 0.00 |
| Variation within clusters                   | podo_b | 82.01   | 60.83      | 0.11 |

**Table S3. Components of covariance from AMOVA analyses.**The components of covariance table shows how much variance is detected at each stratification. Sigma represents the variance for each hierarchical level and to the right is the percent of the total.

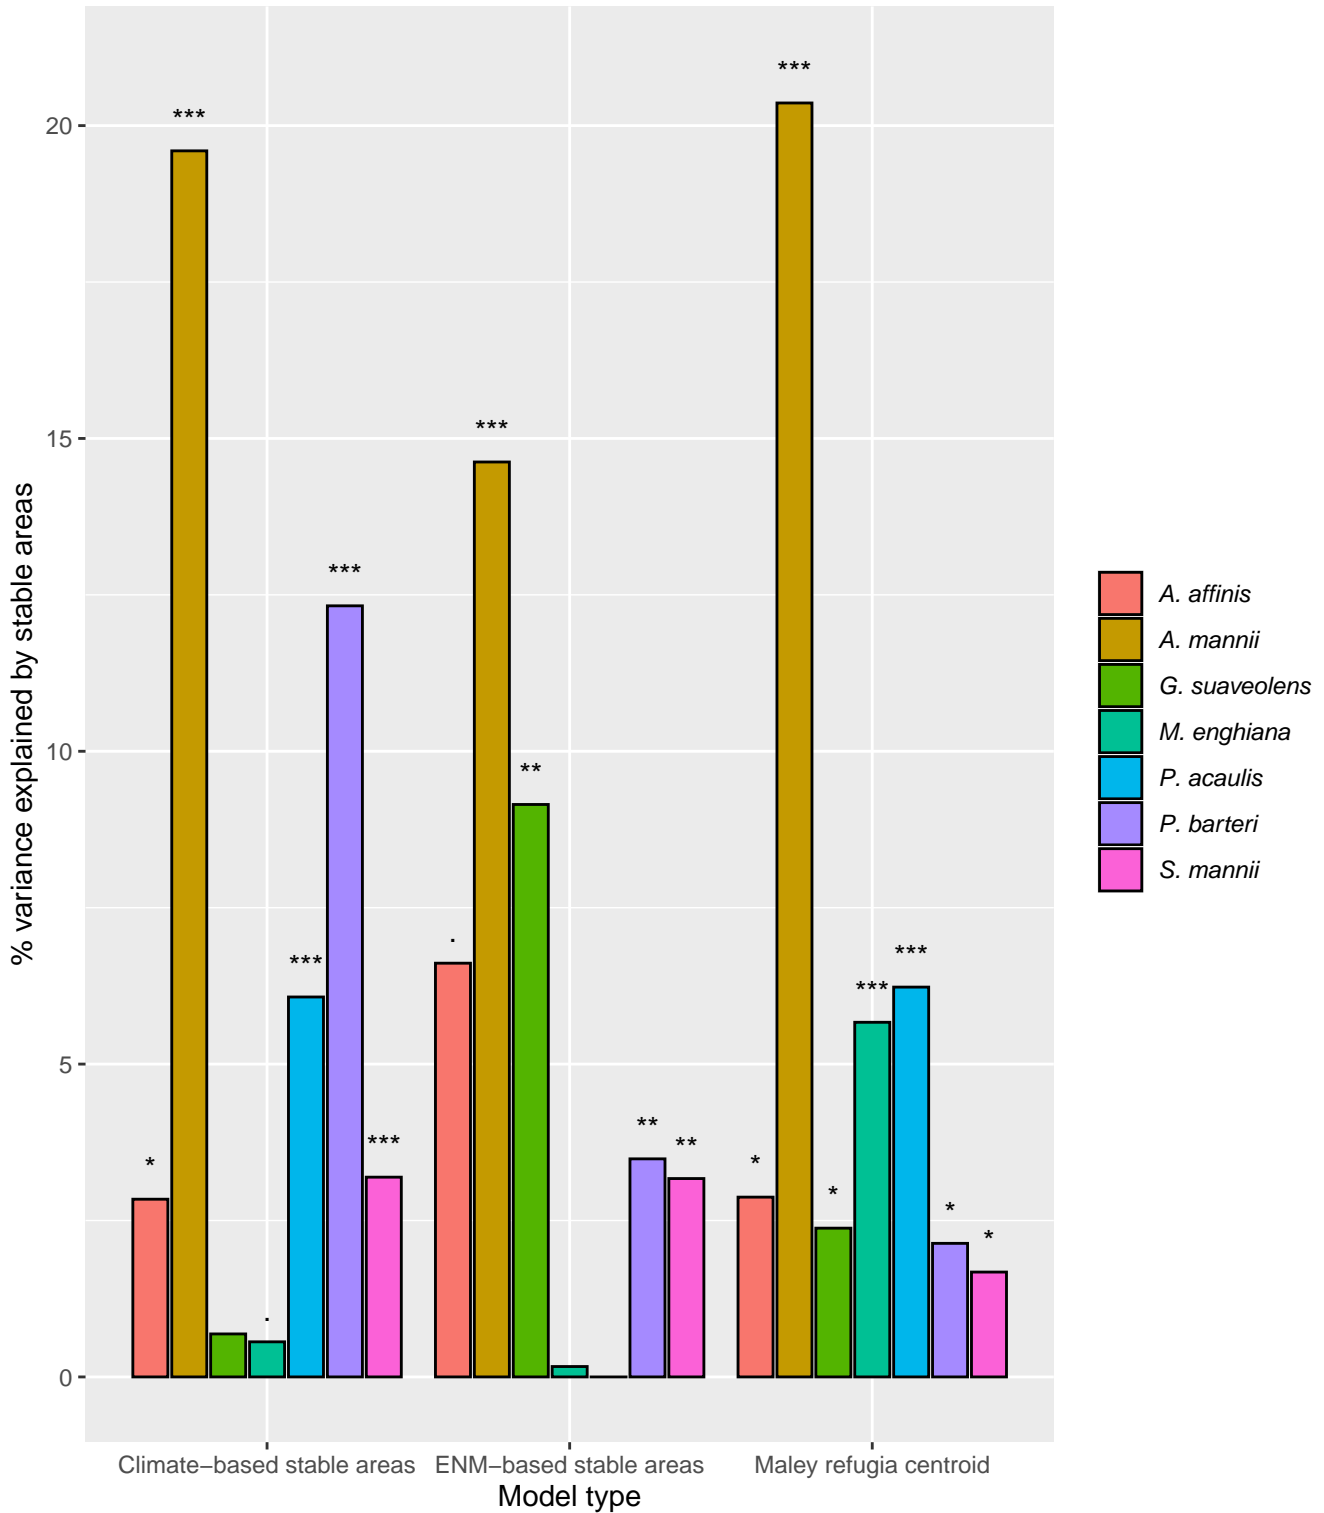

**Fig. S19.** Barplot showing the amount of genetic variance explained by different concepts of refugia (1st quantile); climate-based, ENM-based and Maley's (1996) refugia. Bars are coloured by species and significance is denoted above each bar (. =  $p < 0.1$ , \* =  $p < 0.05$ , \*\* =  $p < 0.01$ , \*\*\* =  $p < 0.001$ ). No *P. acaulis* individuals occurred within estimated ENM stable areas so the corresponding AMOVA was not conducted.

77 **Fossil calibrations**

| Fossil name             | Hard lower bound | Soft upper bound (95%) | Exponential mean |
|-------------------------|------------------|------------------------|------------------|
| Sabalites carolinensis  | 85.80            | 88.80                  | 1.00             |
| Attaleinae              | 54.80            | 60.79                  | 2.00             |
| Hyphaeneocarpon indicum | 64.00            | 67.00                  | 0.80             |

**Table S4. Fossil calibrations used for the palm backbone tree inference. Parameters are for priors with an exponential distribution.**

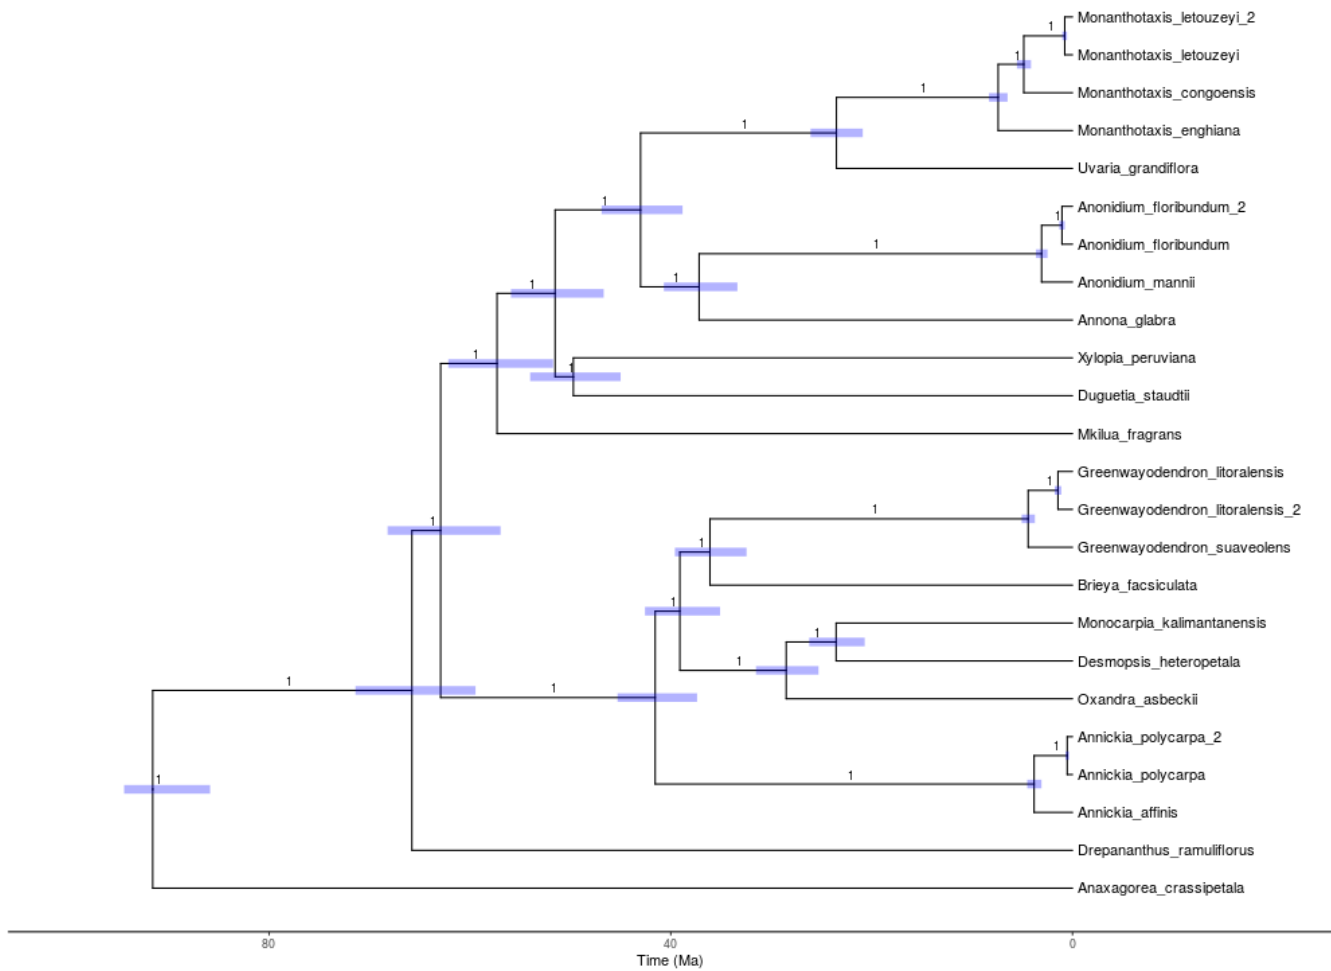

**Fig. S20.** Backbone tree of Annonaceae constructed using BEAST2. The tree was calibrated with a single fossil calibration at the root node. Posterior probabilities are indicated above the corresponding branch. 95% highest posterior densities (HPD) of node age are shown with blue bars at nodes.

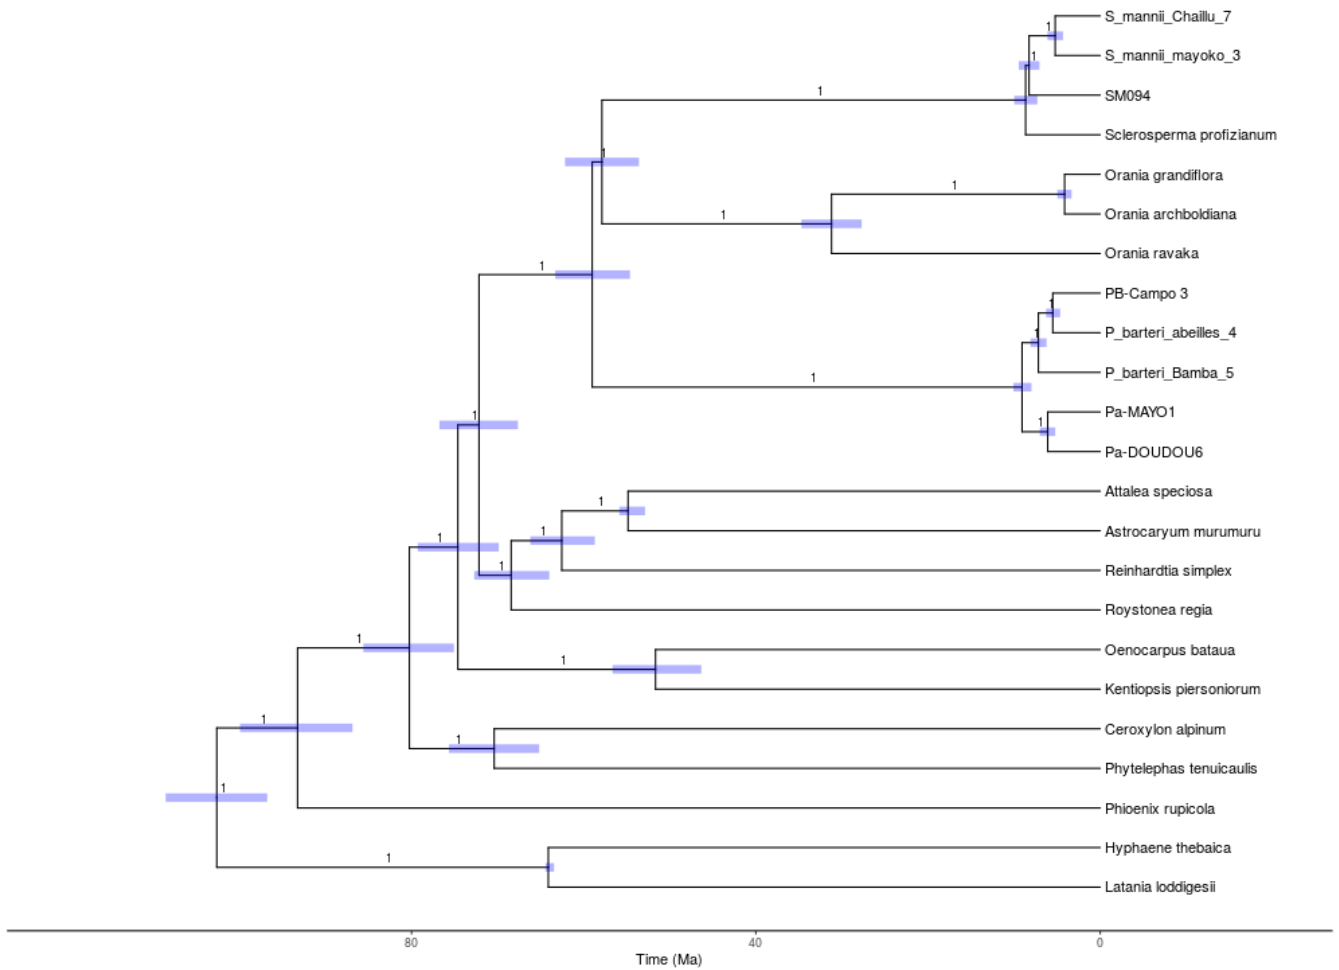

**Fig. S21.** Backbone tree of Areaceae constructed using BEAST2. The tree was calibrated with a single fossil calibration at the root node. Posterior probabilities are indicated above the corresponding branch. 95% highest posterior densities (HPD) of node age are shown with blue bars at nodes.



79 **Backbone-and-patch trees**

80 To achieve a tree with all species and backbone taxa we performed a backbone-and-patch approach as outlined in (6). For each  
 81 species we first rescaled the StarBEAST tree, setting the root age as the time of divergence between the focal species and  
 82 its closest outgroup (e.g. *Annickia affinis* and *A. polycarpa*). We then shortened the tip leading to its representative in the  
 83 backbone tree using the stem/crown ratio of our StarBEAST tree. The StarBEAST tree was then grafted to the shortened tip  
 84 while the tree remained ultrametric. We repeated this for each plant family, Annonaceae (Fig. S22) and Arecaceae (Fig. S23),  
 85 separately.

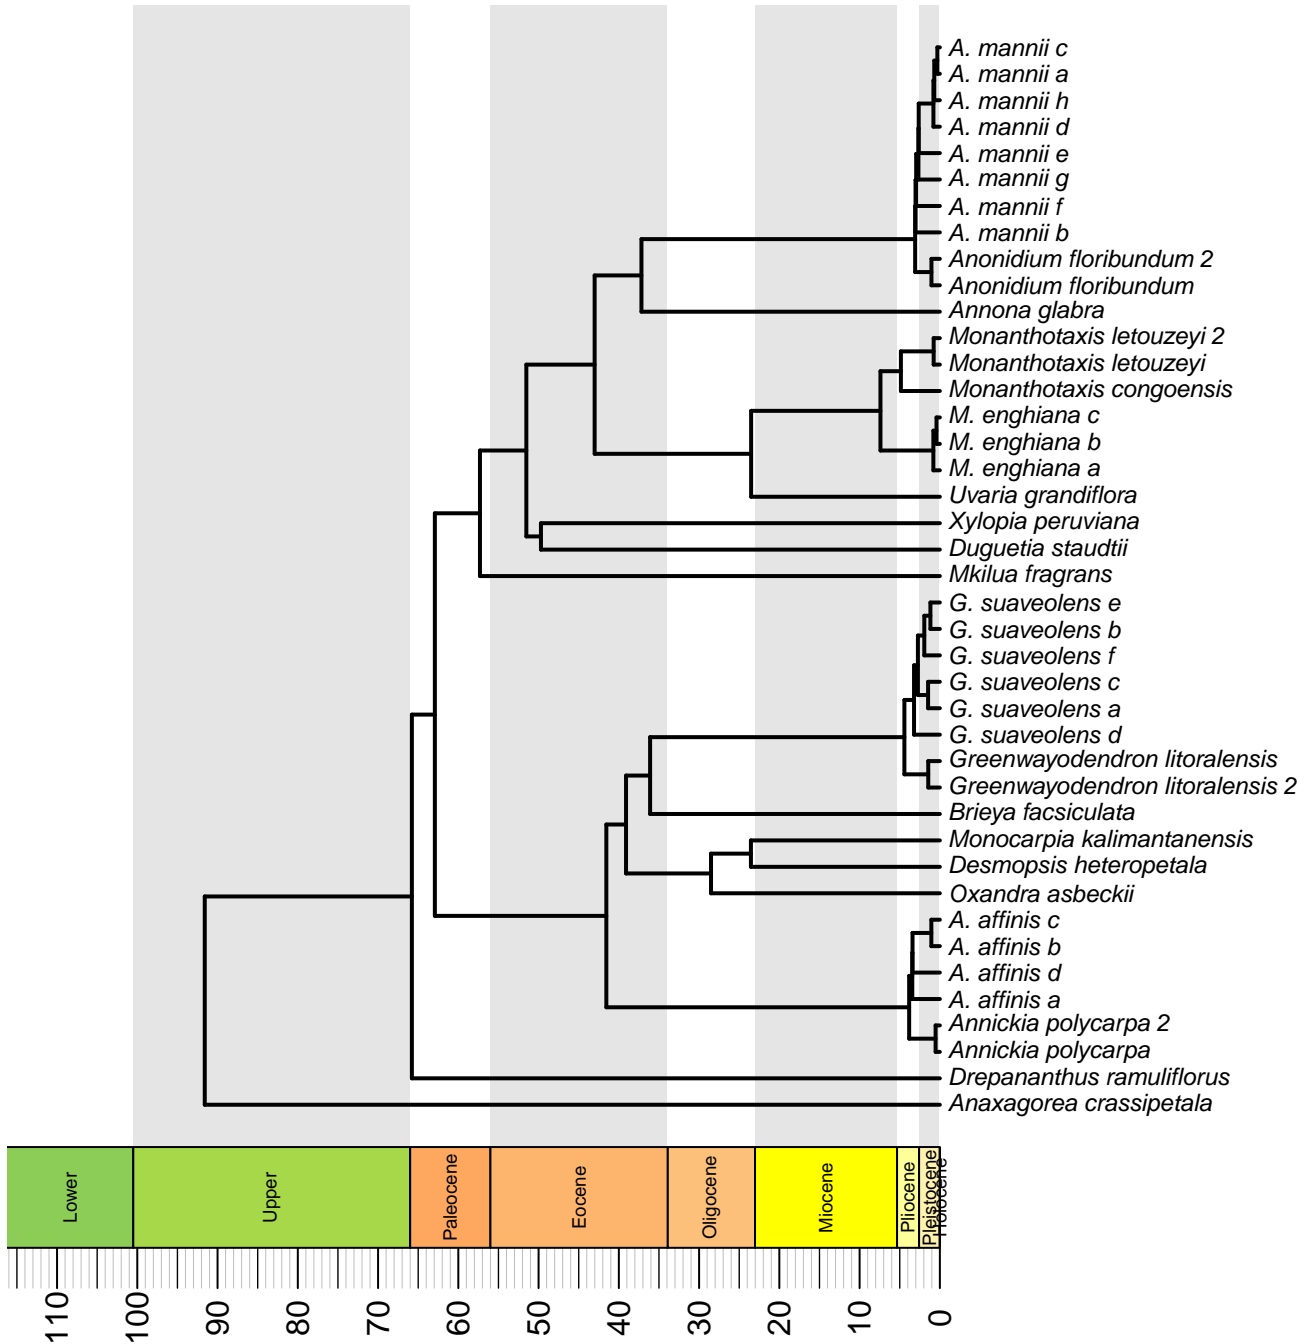

**Fig. S22.** Phylogenetic trees showing the timing of population divergence events in four Annonaceae species. The tree was built using the backbone-and-patch approach whereby a backbone tree was first constructed for Annonaceae (Fig. S20) and then StarBEAST trees were rescaled and grafted into place on the backbone trees (see methods for further details). Timescale and epochs are shown on the x axis.

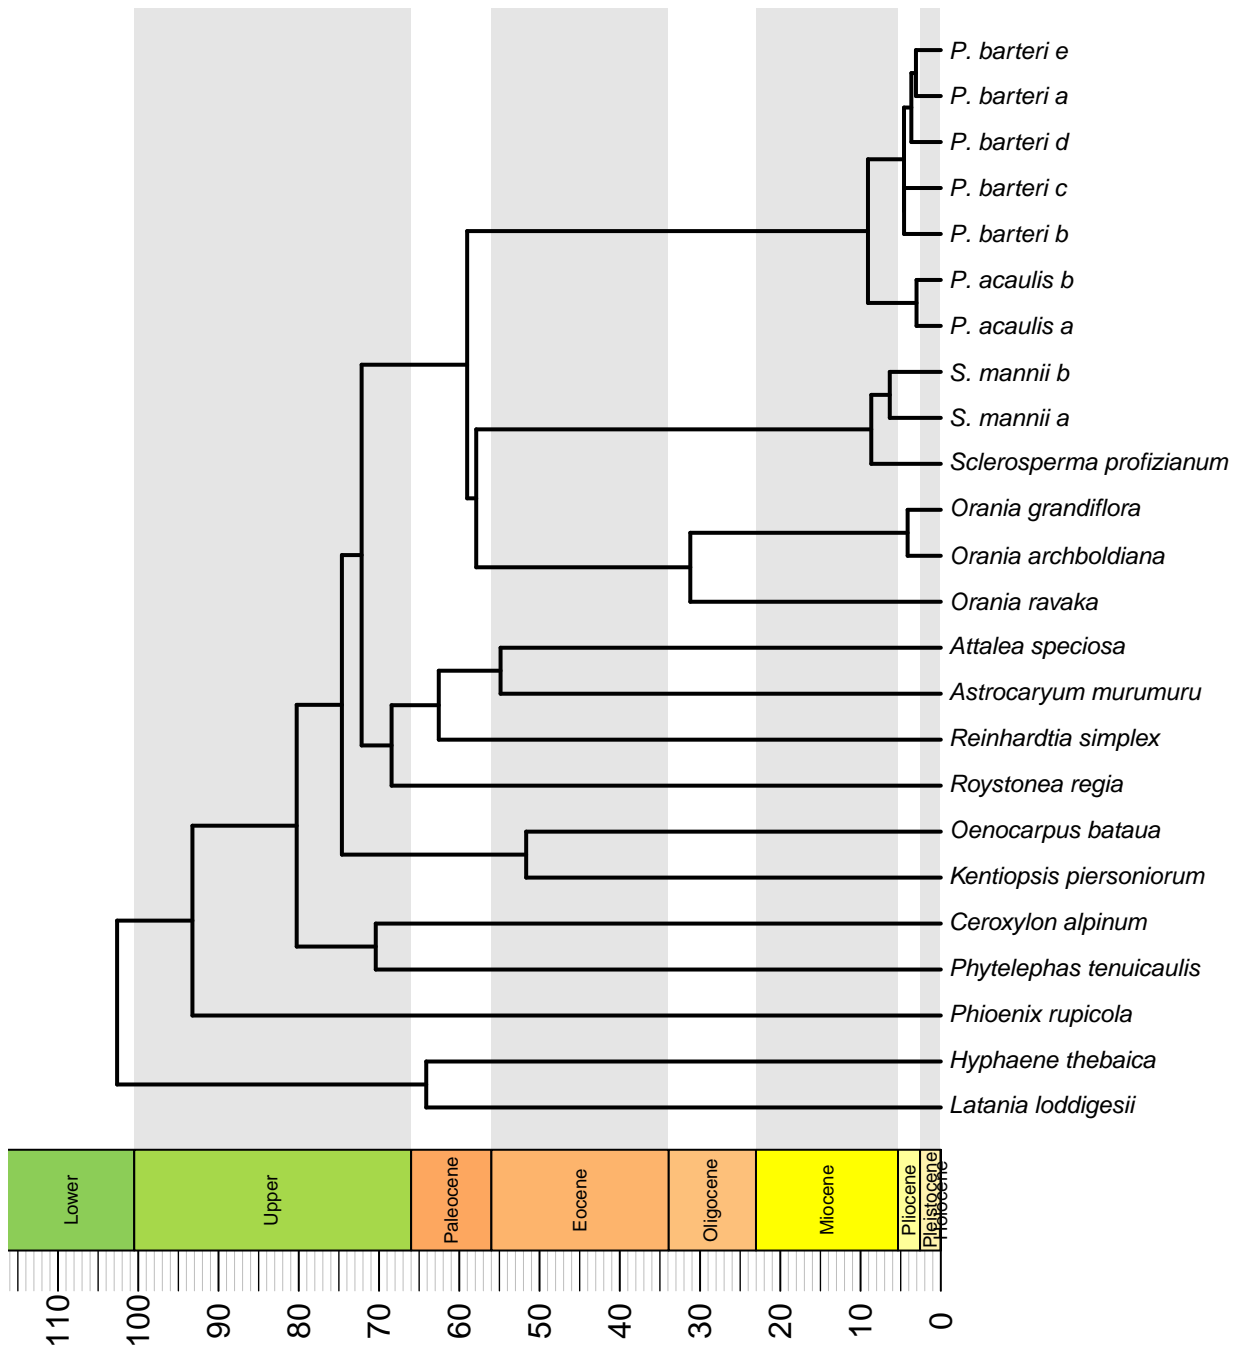

**Fig. S23.** Phylogenetic trees showing the timing of population divergence events in three Palm species. The tree was built using the backbone-and-patch approach whereby a backbone tree was first constructed for Arecaceae (Fig. S21) and then StarBEAST trees were rescaled and grafted into place on the backbone trees (see methods for further details). Timescale and epochs are shown on the x axis.

## 86 Phylogenetic trees reconstructed using StarBEAST and DENIM

### 87 Summary of the three molecular dating methods used.

- 88 1. StarBEAST is a typical coalescent Bayesian inference method, allowing us to jointly date and infer topologies for  
89 phylogenetic trees.
- 90 2. DENIM extends this by accounting for migration in the data, providing a useful comparison to understand the potential  
91 impact of low-level migration.
- 92 3. The backbone-and-patch approach produces a tree with both inter and intraspecific relationships, and avoids the additional  
93 noise produced when using secondary calibrations by rescaling the tree based on fossil calibrations on backbone tree.

94 In preliminary analyses we examined the effect of taking phased alleles into account (7) as output by SECAPR (8). In addition,  
95 we examined estimated ages in *A. affinis* and found that they extensively overlapped with those inferred using a consensus  
96 sequence (Fig. S30b). However, this approach doubles the number of tips, resulting in significantly more computational  
97 time, so for these two reasons we used a single sequence per individual. We also ran our StarBEAST analysis with a relaxed  
98 uncorrelated lognormal clock model, in comparison with a strict clock to compare divergence times (Fig. S30c). We found that  
99 times were generally similar but convergence was much harder to achieve and required computation time was significantly  
100 longer. Monophyly constraints were used on the focal Annonaceae species as preliminary runs yielded non-monophyletic species  
101 in some cases. Preliminary runs indicated that this was not necessary for the palm species.

102 **Divergence estimation notwithstanding ILS and migration (DENIM).** In order to account for migration amongst different genetic  
103 clusters we also used the Divergence estimation notwithstanding ILS and migration (DENIM) approach (9). The model used is  
104 similar to IMA2 (10), though the phylogenetic tree is estimated under a birth-death model rather than being assumed. Migration  
105 is calculated between pairs of branches using an n-island model, providing information about the number of migrations within  
106 each gene tree. DENIM can perform poorly when levels of migration are high. Nevertheless, taking migration into account  
107 when it may be present can help to improve the estimation of topology and divergence times and acts as a useful comparison  
108 to our StarBEAST analyses. We ran DENIM analyses using the same loci and substitution models as our StarBEAST analyses.  
109 We assumed a strict clock and followed the instructions in the DENIM manual in regard to prior choice. In some cases (notably  
110 *A. mannii* and *G. suaveolens*) we had to set upper limits on clock rate to avoid the analysis finding stationarity at implausibly  
111 high rates. We conducted multiple (2-3) runs for each species, and summarised the combined the posterior distribution of trees  
112 from each run to produce a maximum-clade credibility (MCC) tree.

113 It is important to note the coalescent phylogenetic analyses results could be influenced by gene flow among genetic clusters  
114 leading to underestimation of the timing of divergence events (11). However, our DENIM approach takes into account low  
115 levels of migration, and yielded broadly similar topologies and divergence times when compared to analyses without migration  
116 (Fig. S24-S29). Furthermore, our clustering analyses revealed limited evidence for admixture between genetic clusters (Fig. S3).  
117 Species in which admixture was more prevalent (e.g. *M. enghiana*) may have actually diverged earlier than estimated in our  
118 phylogenetic trees (see Fig. 3 in the main text). However, this admixture is not necessarily indicative of ongoing gene flow.  
119 Introgression events may cause loci to deviate from the molecular clock. Given that we selected markers by this metric, this  
120 may have helped to reduce the effect of any potential gene flow.

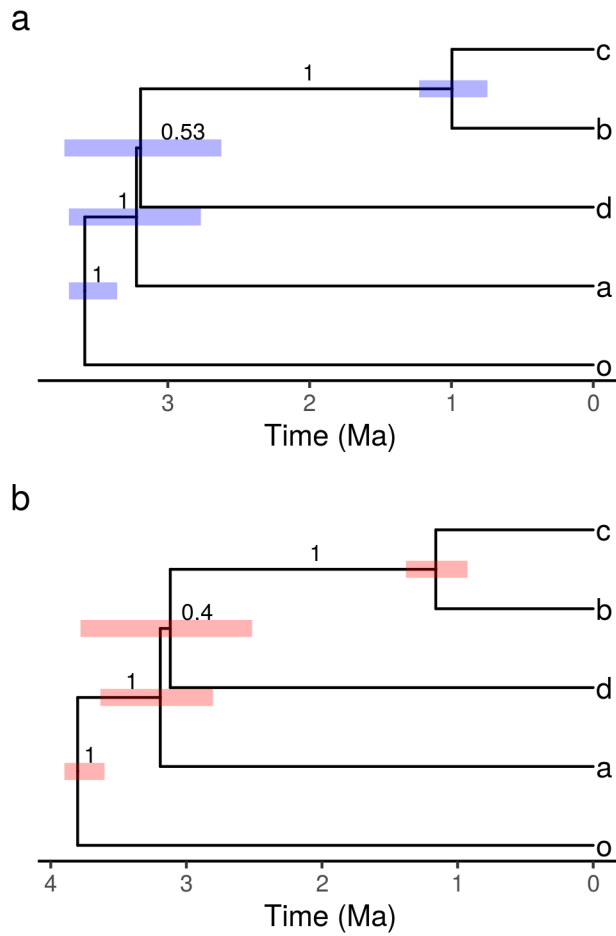

**Fig. S24.** Phylogenetic trees inferred using (a) StarBEAST and (b) DENIM for *A. affinis*. Genetic clusters are labelled alphabetically from 'a' to 'd' and outgroups are labelled 'o'. Node ages represent target heights and node bars represent 95% highest posterior densities of divergence times. Posterior probabilities are annotated on trees for each divergence event (0-1).

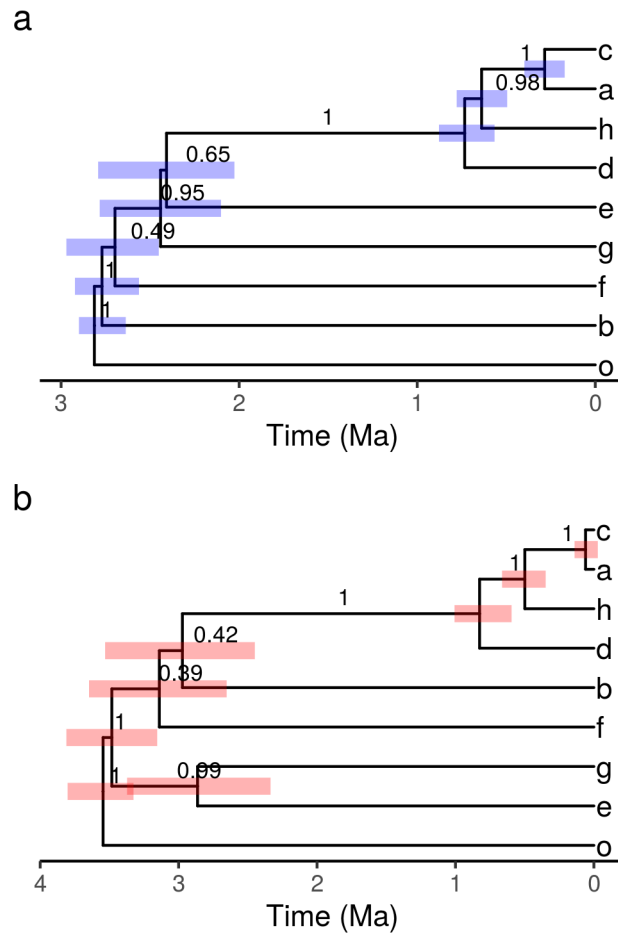

**Fig. S25.** Phylogenetic trees inferred using (a) StarBEAST and (b) DENIM for *A. manni*. Genetic clusters are labelled alphabetically from 'a' to 'h' and outgroups are labelled 'o'. Node ages represent target heights and node bars represent 95% highest posterior densities of divergence times. Posterior probabilities are annotated on trees for each divergence event (0-1).

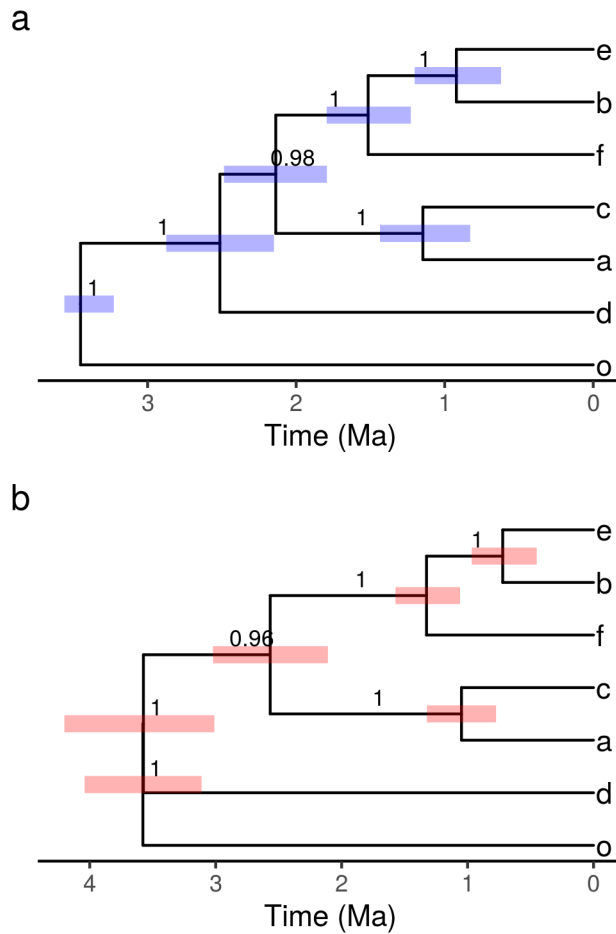

**Fig. S26.** Phylogenetic trees inferred using (a) StarBEAST and (b) DENIM for *G. suaveolens*. Genetic clusters are labelled alphabetically from 'a' to 'f' and outgroups are labelled 'o'. Node ages represent target heights and node bars represent 95% highest posterior densities of divergence times. Posterior probabilities are annotated on trees for each divergence event (0-1).

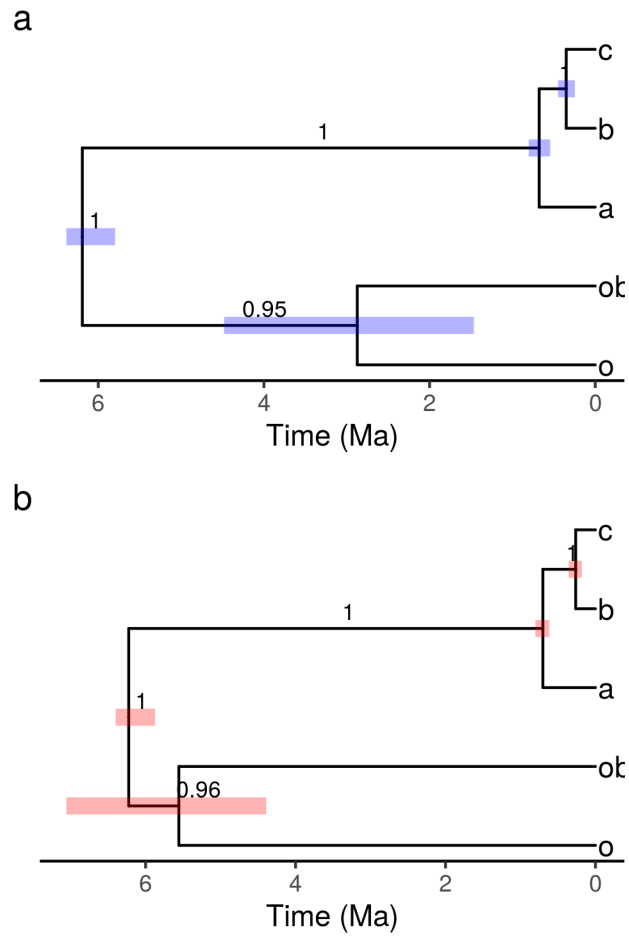

**Fig. S27.** Phylogenetic trees inferred using (a) StarBEAST and (b) DENIM for *M. enghiana*. Genetic clusters are labelled alphabetically from 'a' to 'c' and outgroups are labelled 'o' and 'ob'. Node ages represent target heights and node bars represent 95% highest posterior densities of divergence times. Posterior probabilities are annotated on trees for each divergence event (0-1).

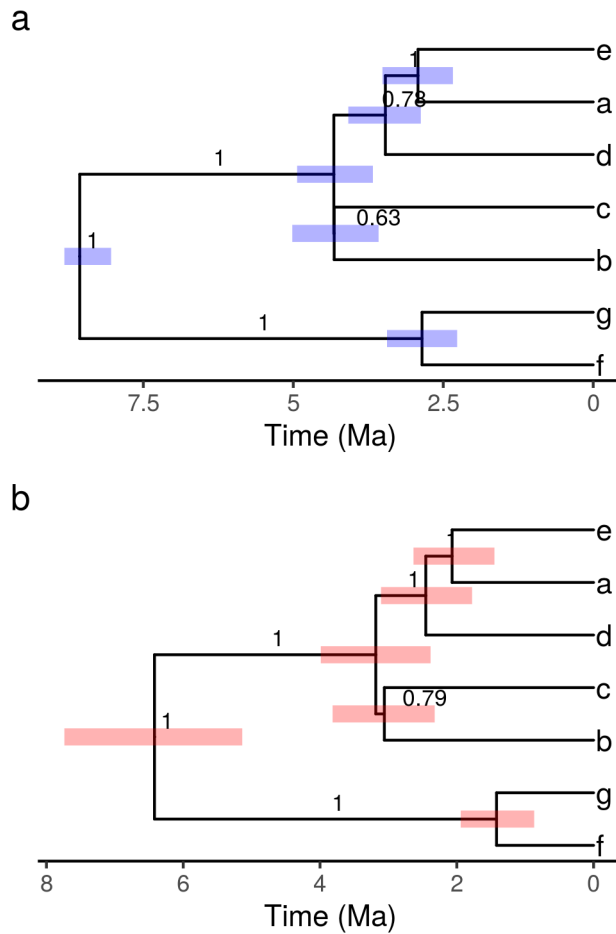

**Fig. S28.** Phylogenetic trees inferred using (a) StarBEAST and (b) DENIM for *P. acaulis* and *P. barteri*. Genetic clusters are labelled alphabetically from 'a' to 'e' for *P. barteri* and 'f' to 'g' for *P. acaulis*. Node ages represent target heights and node bars represent 95% highest posterior densities of divergence times. Posterior probabilities are annotated on trees for each divergence event (0-1).



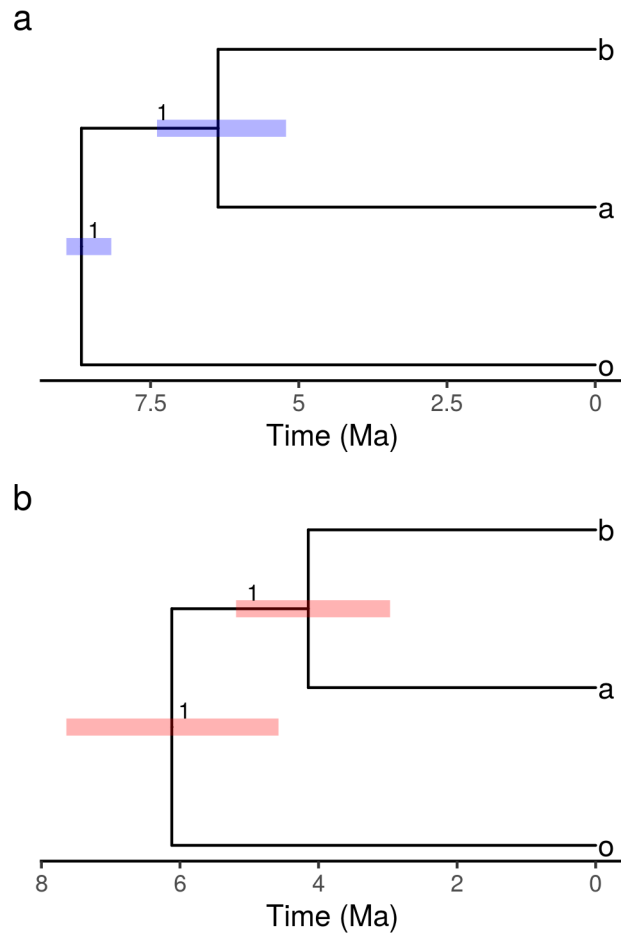

**Fig. S29.** Phylogenetic trees inferred using (a) StarBEAST and (b) DENIM for *S. manni*. Genetic clusters are labelled alphabetically from 'a' to 'b' and outgroups are labelled 'o'. Node ages represent target heights and node bars represent 95% highest posterior densities of divergence times. Posterior probabilities are annotated on trees for each divergence event (0-1).

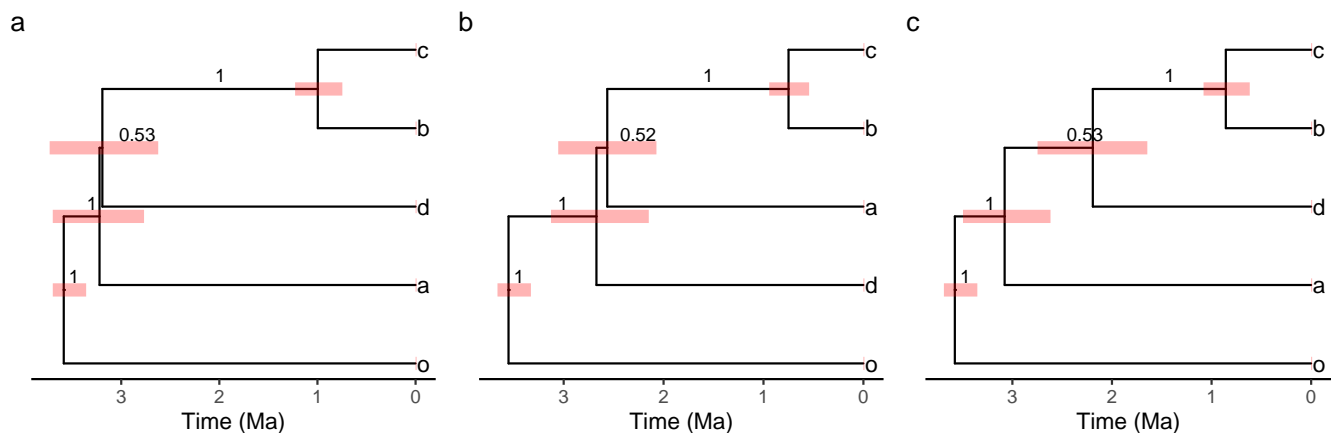

**Fig. S30.** Phylogenetic reconstruction in *A. affinis* using (a) single consensus sequence, (b) two allele sequences per individual for assessing divergence times and (c) as in (a) but with uncorrelated lognormal relaxed clock models instead of strict clock. Blue bars around nodes indicate 95% confidence intervals. Pie charts at nodes show posterior probability percentages. We note that the random set of five individuals per cluster used in (b) is different to those in (a) and (c).

| Variable.name                                               | Description                                                                                                                     |
|-------------------------------------------------------------|---------------------------------------------------------------------------------------------------------------------------------|
| BIO1                                                        | Annual Mean Temperature                                                                                                         |
| BIO2                                                        | Mean Diurnal Range (Mean of monthly (max temp - min temp))                                                                      |
| BIO3                                                        | Isothermality (BIO2/BIO7)                                                                                                       |
| BIO4                                                        | Temperature Seasonality (standard deviation)                                                                                    |
| BIO5                                                        | Max Temperature of Warmest Month                                                                                                |
| BIO6                                                        | Min Temperature of Coldest Month                                                                                                |
| BIO7                                                        | Temperature Annual Range (BIO5-BIO6)                                                                                            |
| BIO8                                                        | Mean Temperature of Wettest Quarter                                                                                             |
| BIO9                                                        | Mean Temperature of Driest Quarter                                                                                              |
| BIO10                                                       | Mean Temperature of Warmest Quarter                                                                                             |
| BIO11                                                       | Mean Temperature of Coldest Quarter                                                                                             |
| BIO12                                                       | Annual Precipitation                                                                                                            |
| BIO13                                                       | Precipitation of Wettest Month                                                                                                  |
| BIO14                                                       | Precipitation of Driest Month                                                                                                   |
| BIO15                                                       | Precipitation Seasonality (Coefficient of Variation)                                                                            |
| BIO16                                                       | Precipitation of Wettest Quarter                                                                                                |
| BIO17                                                       | Precipitation of Driest Quarter                                                                                                 |
| BIO18                                                       | Precipitation of Warmest Quarter                                                                                                |
| BIO19                                                       | Precipitation of Coldest Quarter                                                                                                |
| altitude                                                    | elevation (m)                                                                                                                   |
| soil order                                                  | USDA soil taxonomy (ST) developed by United States Department of Agriculture and the National Cooperative                       |
| Distance from closest Maley refugia centroid                | Distance (km) from central point of Maley's (1996) proposed refugia                                                             |
| Distance from coast                                         | Distance from coast as calculated with distance from distance_to_coastline_lowres function in the 'distance_to_coast' R package |
| Habitat stability as extracted from ENMs                    | Areas predicted as suitable (TSS threshold) in both past (MPI_ESM_P) and present ENMs.                                          |
| BIO1 stability                                              | Absolute values of differences between past (MIROC_ESM) and present annual mean temperature                                     |
| BIO12 stability                                             | Absolute values of differences between past (MIROC_ESM) and present annualrainfall                                              |
| Combined climatic stability as calculated from climate data | Sum of BIO1 stability and BIO12 stability                                                                                       |
| MEM                                                         | Moran Eigenvector's Maps - multivariate summary of geographic structure                                                         |
| BDRICM_M_250m                                               | Depth to bedrock (R horizon)                                                                                                    |
| BDTICM_M_250m                                               | Absolute depth to bedrock (cm)                                                                                                  |
| BLDFIE_M_sl2_250m                                           | Bulk density (kg m <sup>-3</sup> ) of the fine earth fraction (< 2 mm)                                                          |
| CECSOL_M_sl2_250m                                           | Cation exchange capacity of soil                                                                                                |
| CLYPPT_M_sl2_250m                                           | Proportion of clay particles (< 0.002 mm) in the fine earth fraction                                                            |
| CRFVOL_M_sl2_250m                                           | Volumetric fraction of coarse fragments (> 2 mm)                                                                                |
| OCSTHA_M_sd1_250m                                           | Organic carbon stocks                                                                                                           |
| ORCDRC_M_sl2_250m                                           | Organic carbon density                                                                                                          |
| PHIKCL_M_sl2_250m                                           | Soil pH in KCl solution                                                                                                         |
| SLTPPT_M_sl2_250m                                           | Proportion of silt particles (> 0.002 mm and < 0.05 mm) in the fine earth fraction                                              |
| SNDPPT_M_sl2_250m                                           | Proportion of sand particles (> 0.05 mm) in the fine earth fraction                                                             |
| TAXNWRB_250m                                                | observed taxonomic class in the WRB system (target variable)                                                                    |

**Table S5. Variables used in the ENM and db-RDA analyses. Note that variables related to soil order, TAXNWRB, distances from refugia, MEMs and measures of stability were only used in db-RDA analyses. Further information on soil variables can be found here: <https://www.isric.org/explore/soilgrids/faq-soilgrids>**

## 122 **Ecological Niche Models (ENMs)**

123 We obtained data for the 19 bioclimatic variables from the worldclim database (<http://www.worldclim.org>) including present-  
124 day data ('wc2.1\_2.5m\_bio') and data for three different past-climate models ('CCSM4' (CCL), 'MIROC\_ESM' (MRL),  
125 'MPI\_ESM\_P' (MEL)). We also included data from 11 different soil variables, downloaded from <http://www.soilgrids.org>  
126 (accessed March 2020). Elevation data was obtained using the *get\_elev\_raster* function in the R package 'elevatr'. All data  
127 were resampled to 2.5 arcmin resolution to match present-day climate data. Soil and altitude variables were kept constant in  
128 the past and present. We identified and removed correlated environmental variables ( $>0.9$ ) by running the *raster.cor.matrix*  
129 function in the R package 'ENMTools' (12). The full set of input variables can be found in S5. We collated a total of 1691  
130 individual locations across the seven focal species (see supplementary data for details).

131 We constructed ENMs for each of the seven species using the R package 'biomod2' (13) and climatic, altitude and soil  
132 variables. We created a convex hull around sample points (5 degrees) and used this as a mask to create a background area for  
133 modelling (see R package 'ConR' for additional details (14)). We performed 10 replicates of 10,000 pseudoabsences with the  
134 surface range envelop model (SRE) with a threshold of 0.05 (5%). An SRE is constructed (using the specified quantile) for the  
135 species and pseudoabsences are extracted outside of this envelope. Note that pseudoabsences are randomly generated and will  
136 cause repeated runs to be different We inferred ENMs using five different model algorithms: Generalized linear model (GLM),  
137 Boosted regression trees (GBM), Artificial neural networks (ANN), Random forest (RF), MAXENT.Phillips (maxent). We  
138 evaluated model fit using Cohen's Kappa (KAPPA) and true skill statistic (TSS). Once all algorithms were run we performed  
139 ensemble modeling using all models. We then projected models (of all algorithms) into past (and present) climate, performing  
140 a further ensemble modelling step. Finally we converted ensemble projections to binary presence-absence maps using KAPPA  
141 and TSS. These are plotted below, showing areas suitable for each species under a given statistic and present or past climate  
142 model. We highlight areas that were suitable in the past only, present only, or both. Details of model adequacy can be found  
143 in Table S6. We used results from the 'CCSM4' (AMOVA, db-RDA) and 'MIROC\_ESM' (calculation of climatic stable areas)  
144 past-climate models for downstream analyses.

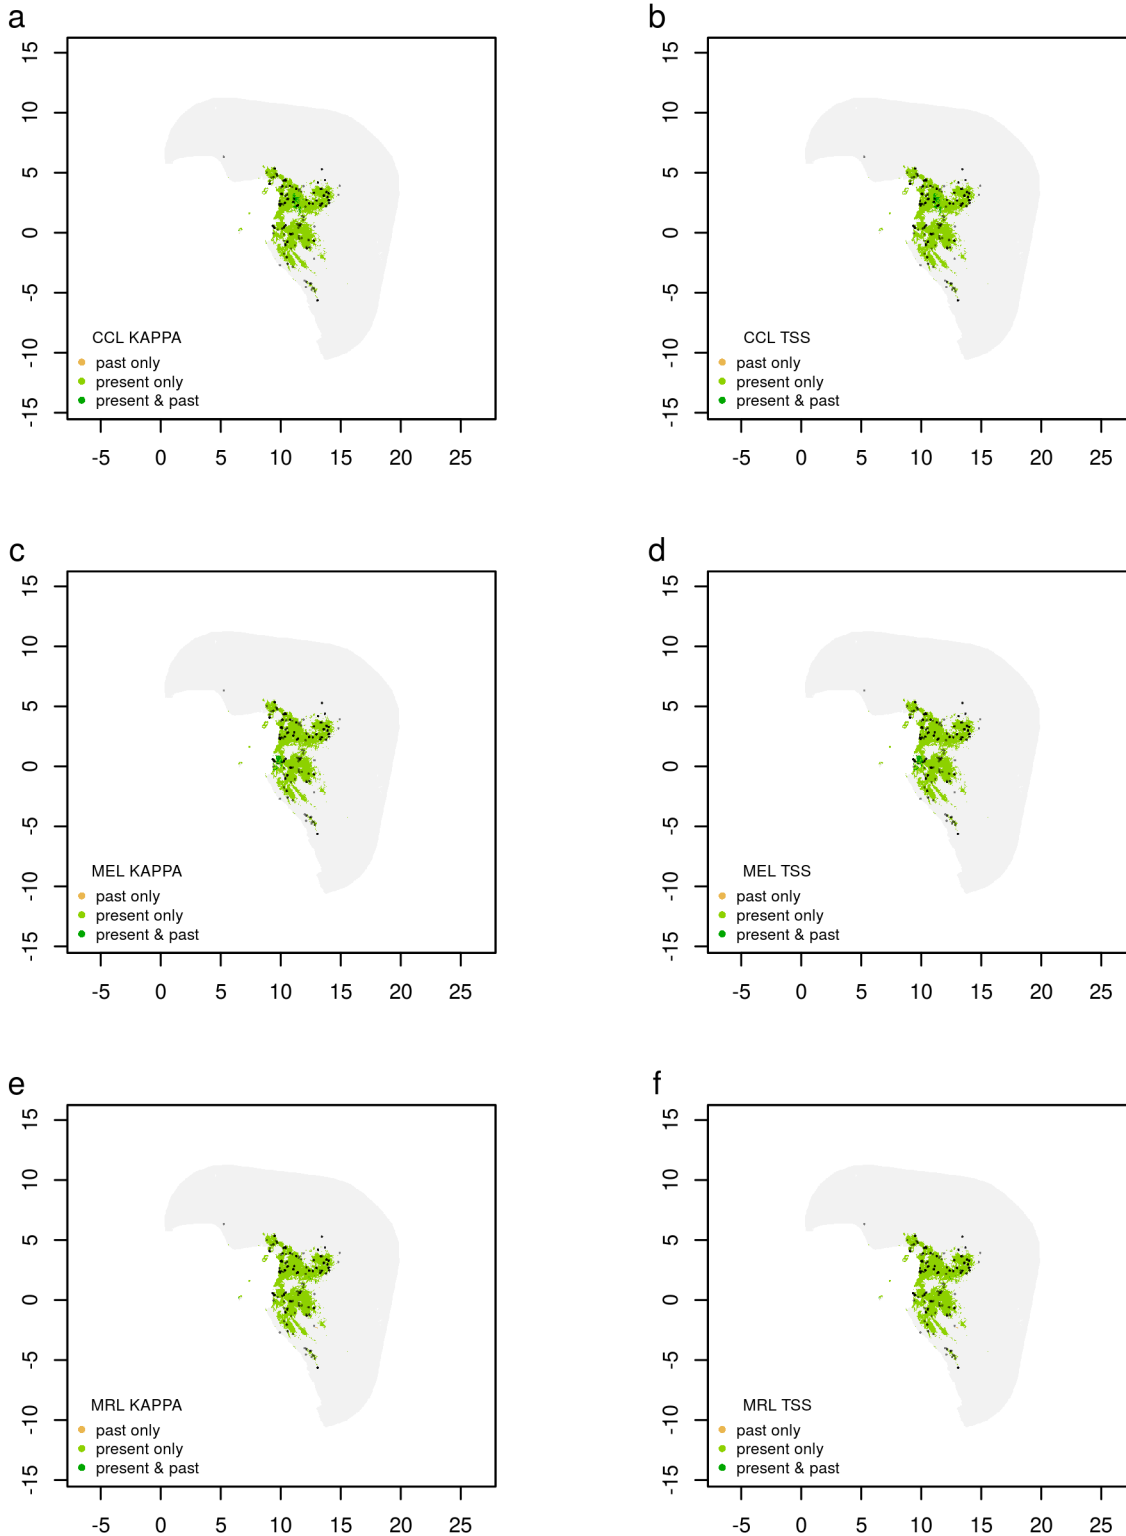

**Fig. S31.** Habitat suitability and stable areas inferred from ecological niche modelling for *A. affinis*. Suitability was summarised as binary maps for present and past climate, these were added together so that values of 0.5 indicate habitat only suitable in the past, values of 1 indicate areas only suitable in the present and values of 1.5 indicate areas suitable during both periods (stable areas). Results are from three different models of past climate: CCL (a-b), MEL (c-d), and MRL (e-f). Two statistics were used to infer binary maps: KAPPA (a, c, e) and the true skill statistic (TSS; b, d, f). Individual locations used in the modelling are shown as black points on each plot.

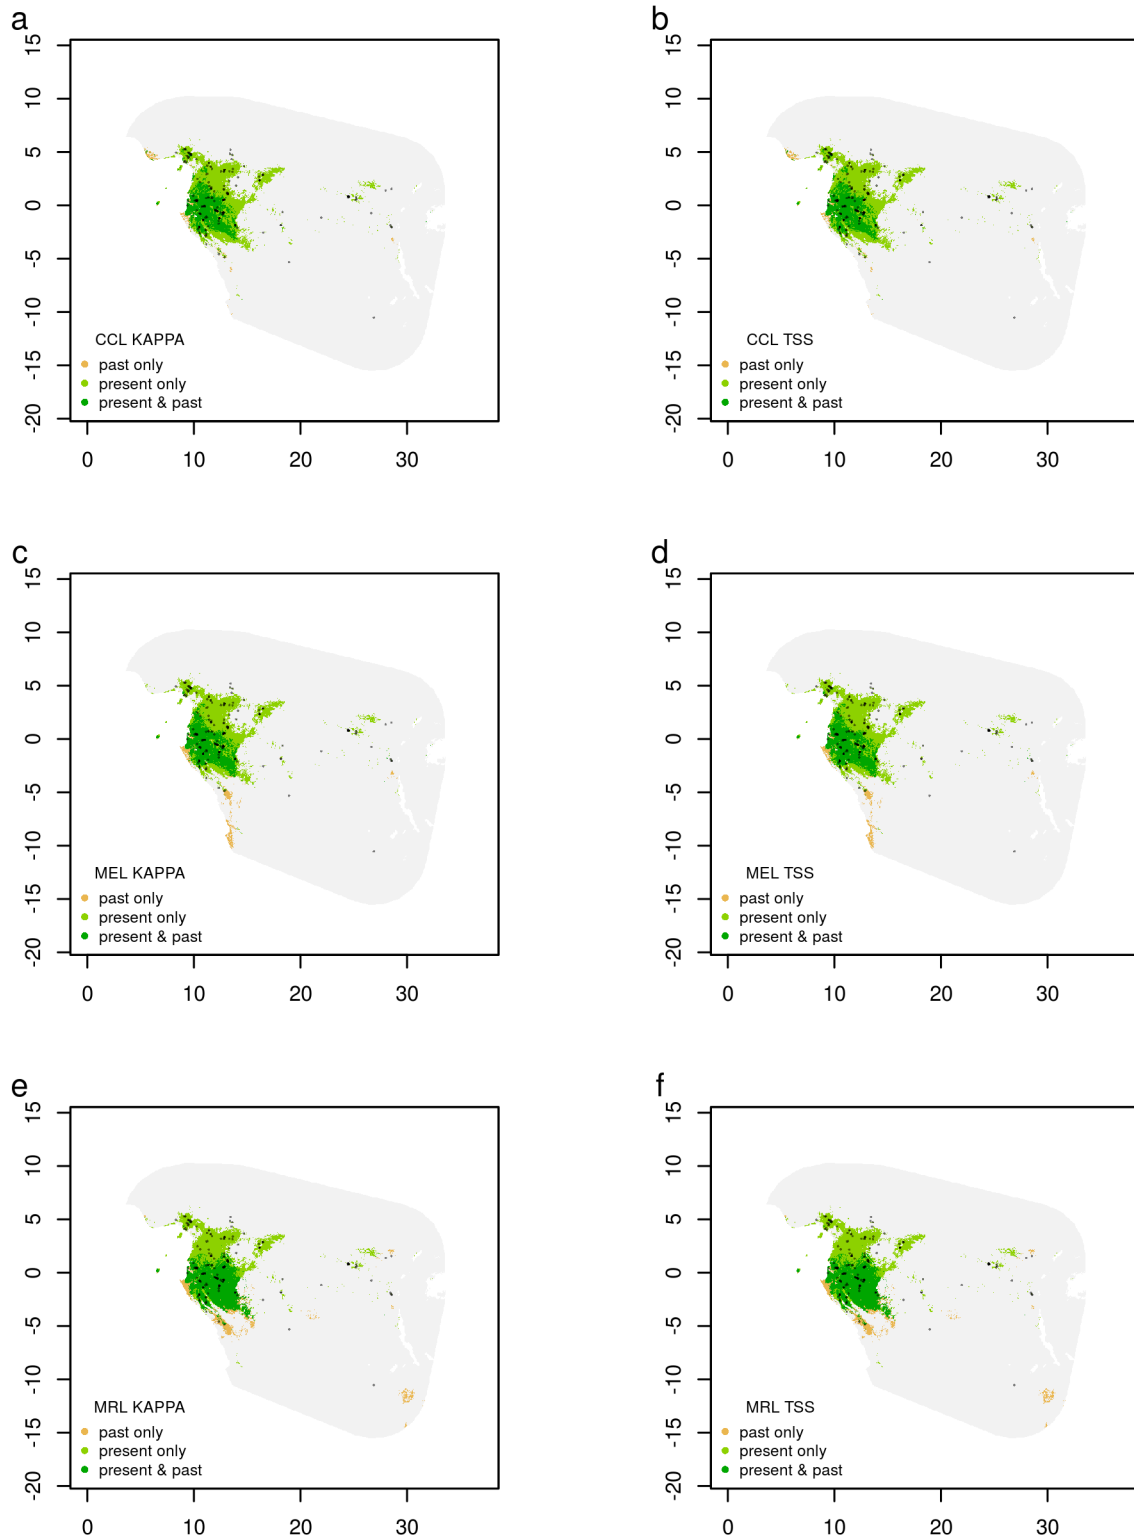

**Fig. S32.** Habitat suitability and stable areas inferred from ecological niche modelling for *A. manni*. Suitability was summarised as binary maps for present and past climate, these were added together so that values of 0.5 indicate habitat only suitable in the past, values of 1 indicate areas only suitable in the present and values of 1.5 indicate areas suitable during both periods (stable areas). Results are from three different models of past climate: CCL (a-b), MEL (c-d), and MRL (e-f). Two statistics were used to infer binary maps: KAPPA (a, c, e) and the true skill statistic (TSS; b, d, f). Individual locations used in the modelling are shown as black points on each plot.

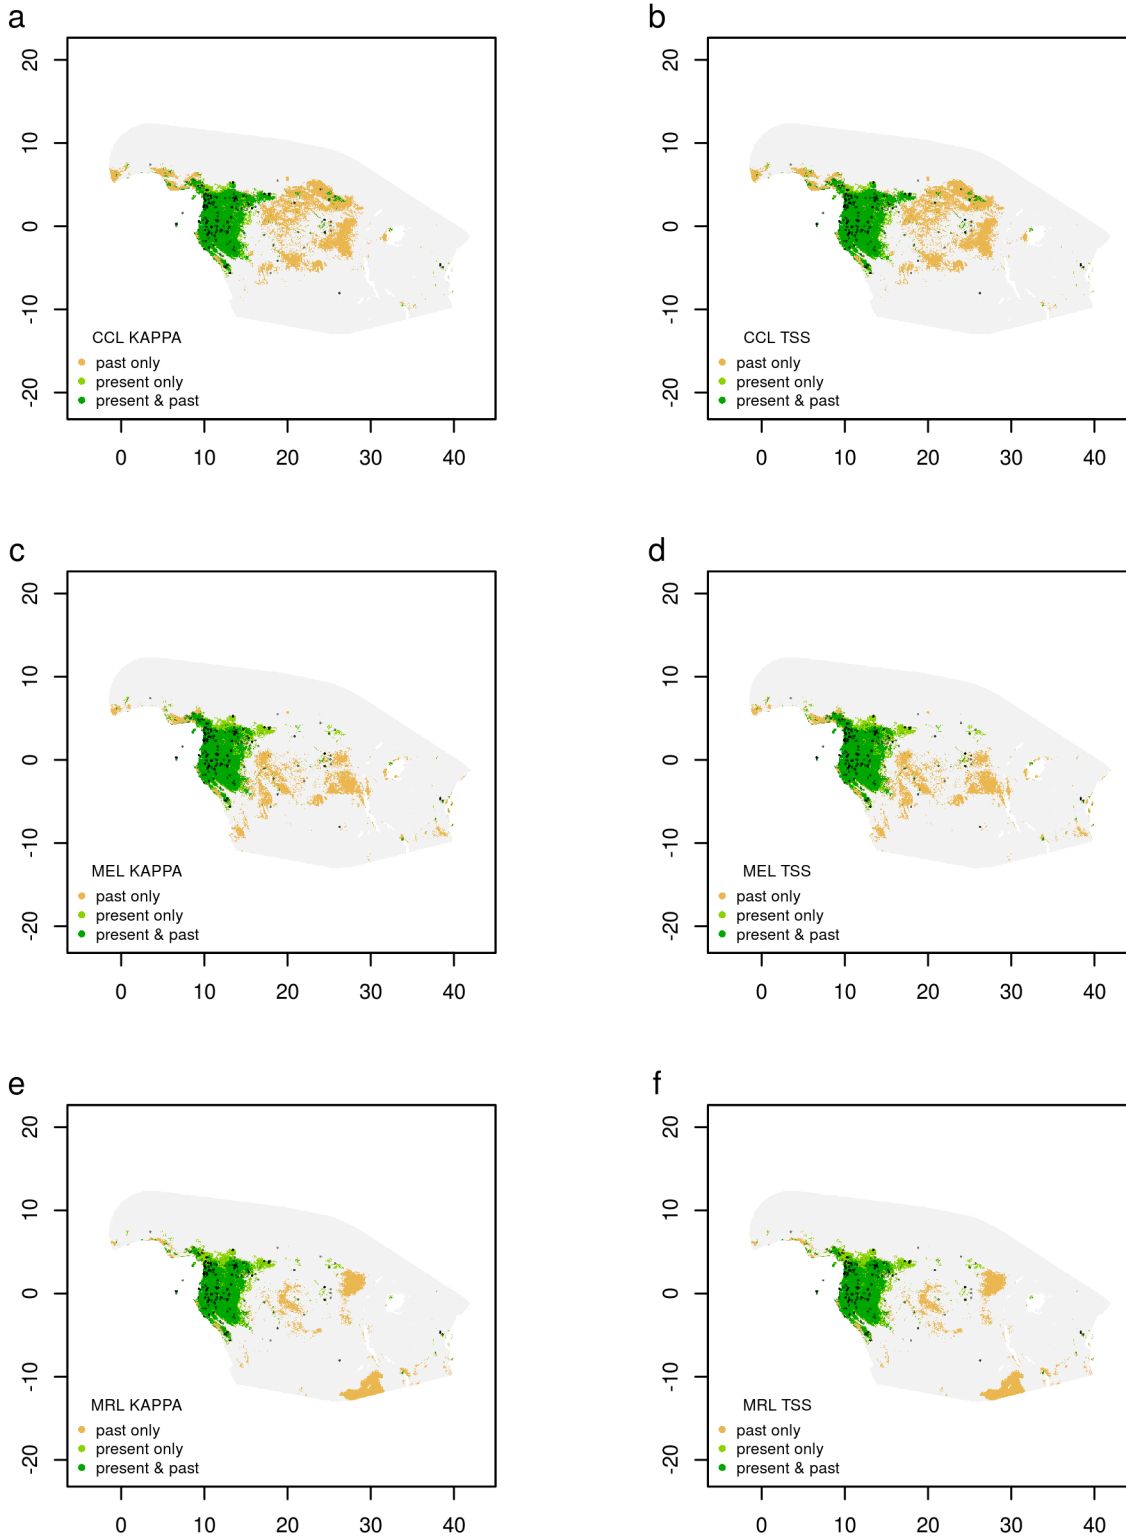

**Fig. S33.** Habitat suitability and stable areas inferred from ecological niche modelling for *G. suaveolens*. Suitability was summarised as binary maps for present and past climate, these were added together so that values of 0.5 indicate habitat only suitable in the past, values of 1 indicate areas only suitable in the present and values of 1.5 indicate areas suitable during both periods (stable areas). Results are from three different models of past climate: CCL (a-b), MEL (c-d), and MRL (e-f). Two statistics were used to infer binary maps: KAPPA (a, c, e) and the true skill statistic (TSS; b, d, f). Individual locations used in the modelling are shown as black points on each plot.

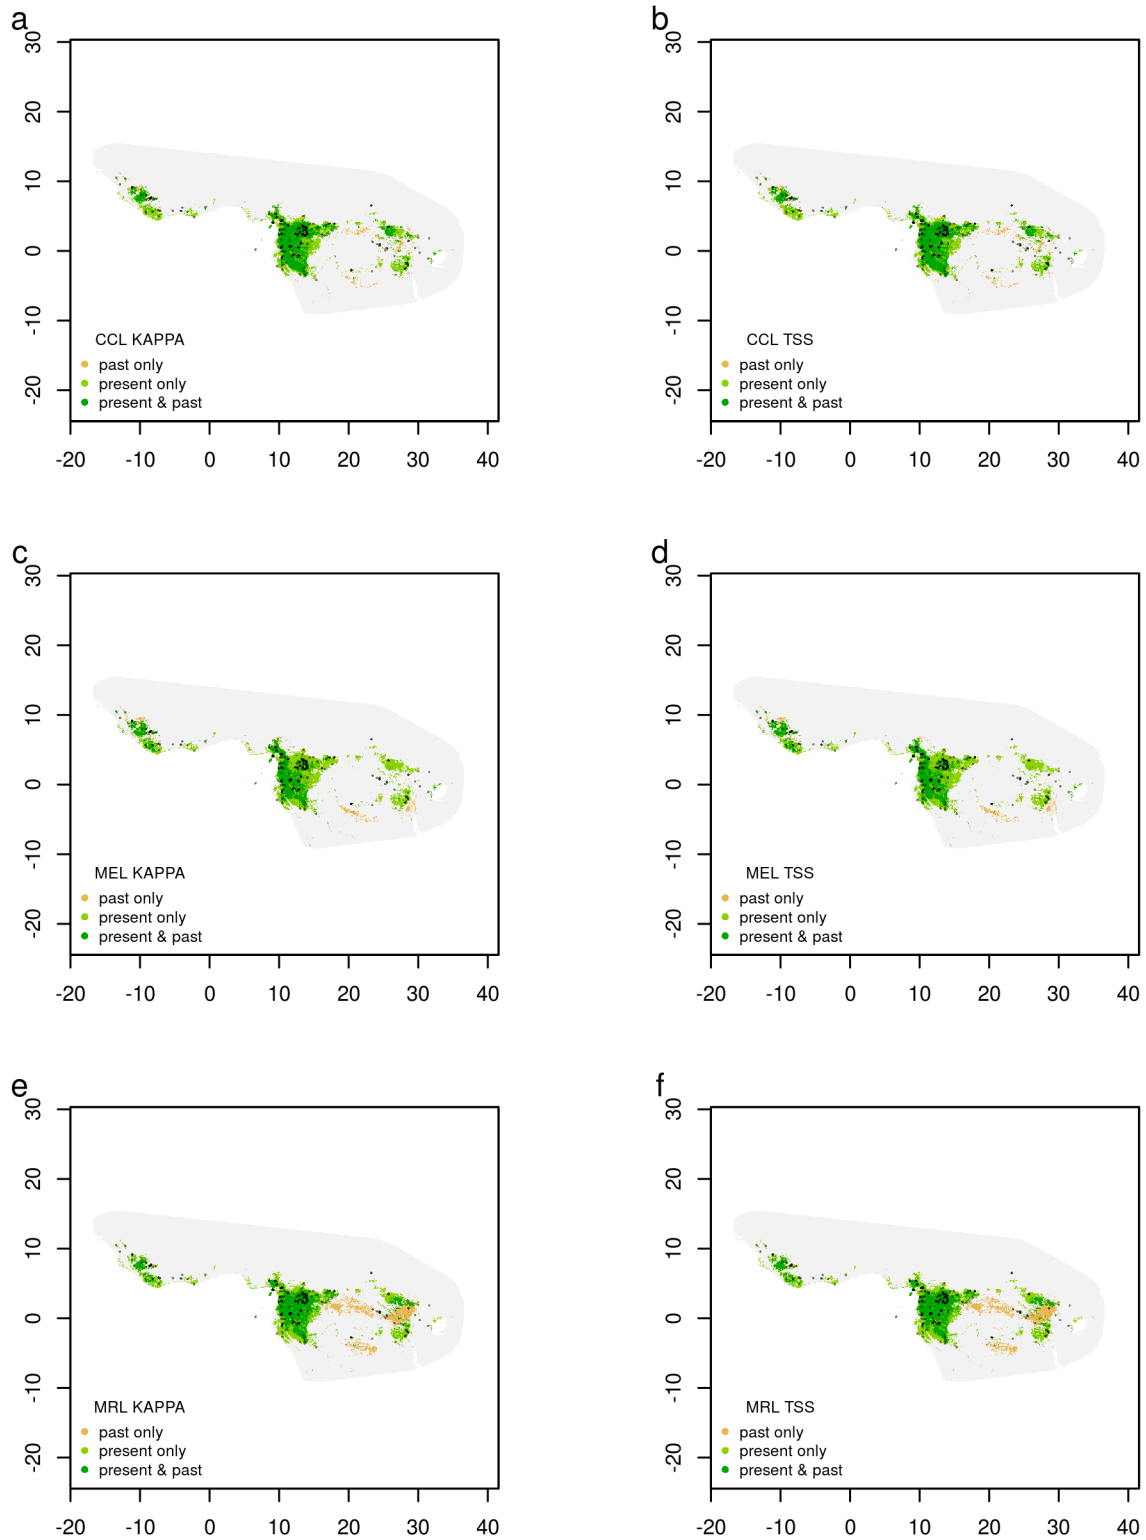

**Fig. S34.** Habitat suitability and stable areas inferred from ecological niche modelling for *M. enghiana*. Suitability was summarised as binary maps for present and past climate, these were added together so that values of 0.5 indicate habitat only suitable in the past, values of 1 indicate areas only suitable in the present and values of 1.5 indicate areas suitable during both periods (stable areas). Results are from three different models of past climate: CCL (a-b), MEL (c-d), and MRL (e-f). Two statistics were used to infer binary maps: KAPPA (a, c, e) and the true skill statistic (TSS; b, d, f). Individual locations used in the modelling are shown as black points on each plot.



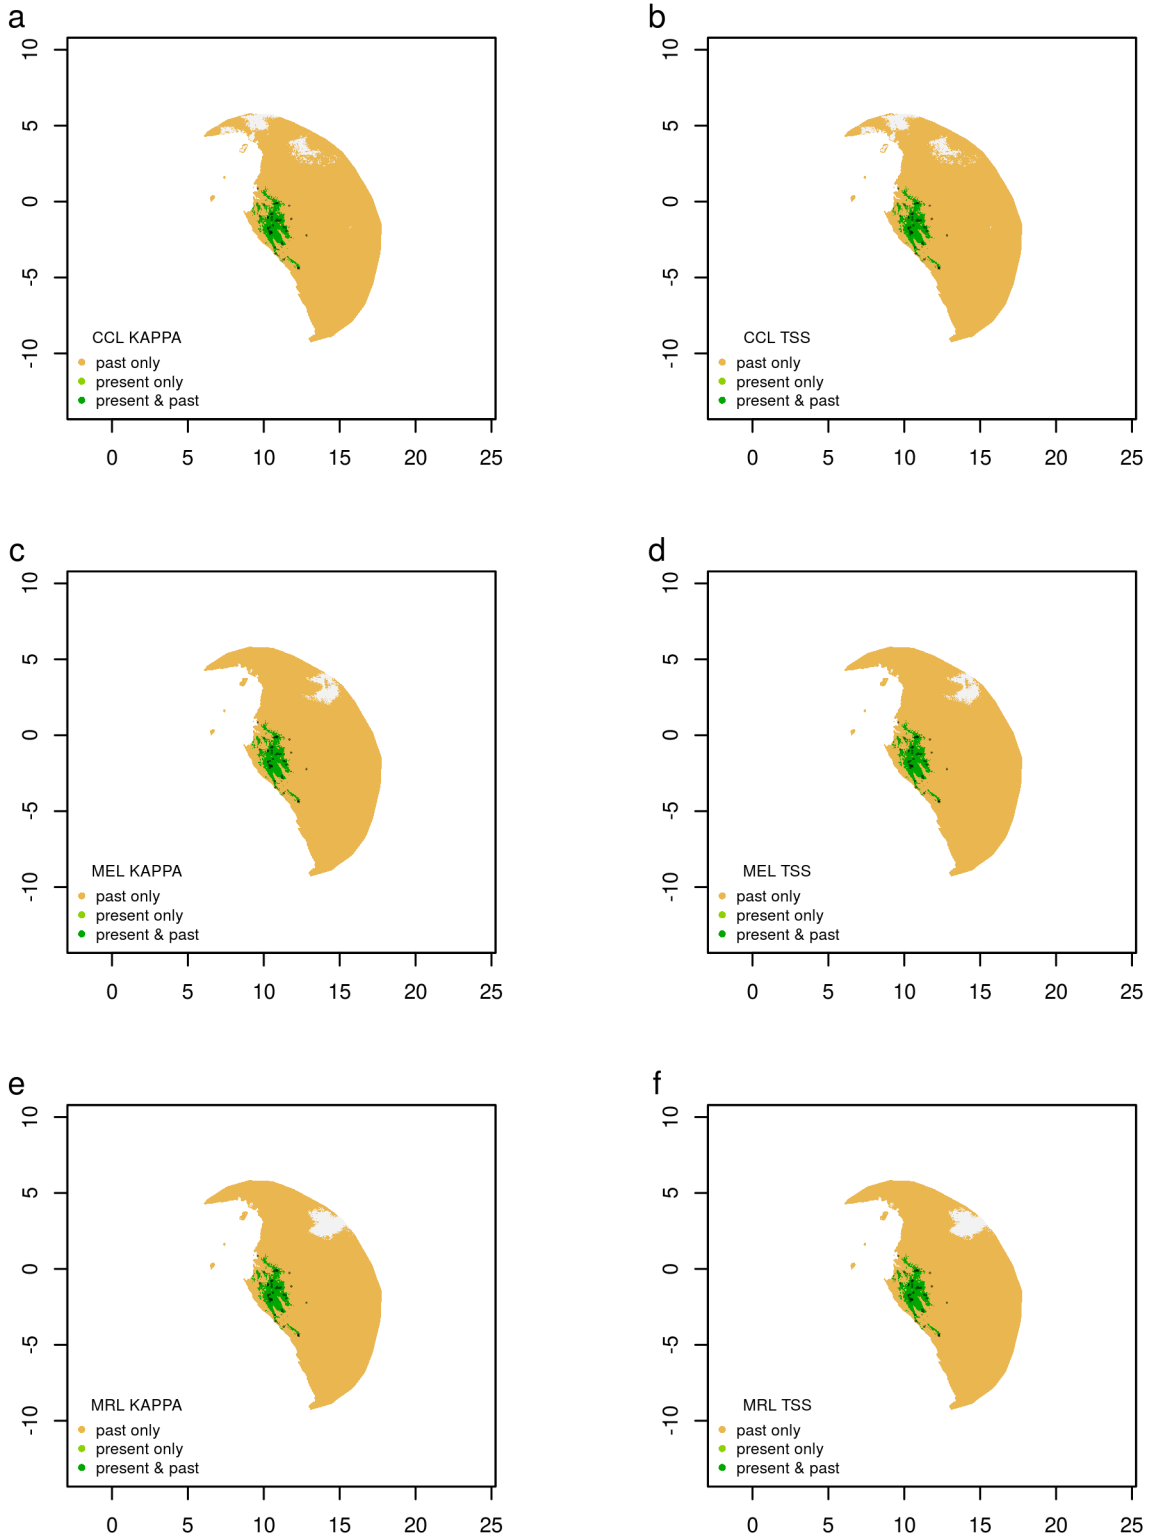

**Fig. S35.** Habitat suitability and stable areas inferred from ecological niche modelling for *P. acaulis*. Suitability was summarised as binary maps for present and past climate, these were added together so that values of 0.5 indicate habitat only suitable in the past, values of 1 indicate areas only suitable in the present and values of 1.5 indicate areas suitable during both periods (stable areas). Results are from three different models of past climate: CCL (a-b), MEL (c-d), and MRL (e-f). Two statistics were used to infer binary maps: KAPPA (a, c, e) and the true skill statistic (TSS; b, d, f). Individual locations used in the modelling are shown as black points on each plot.

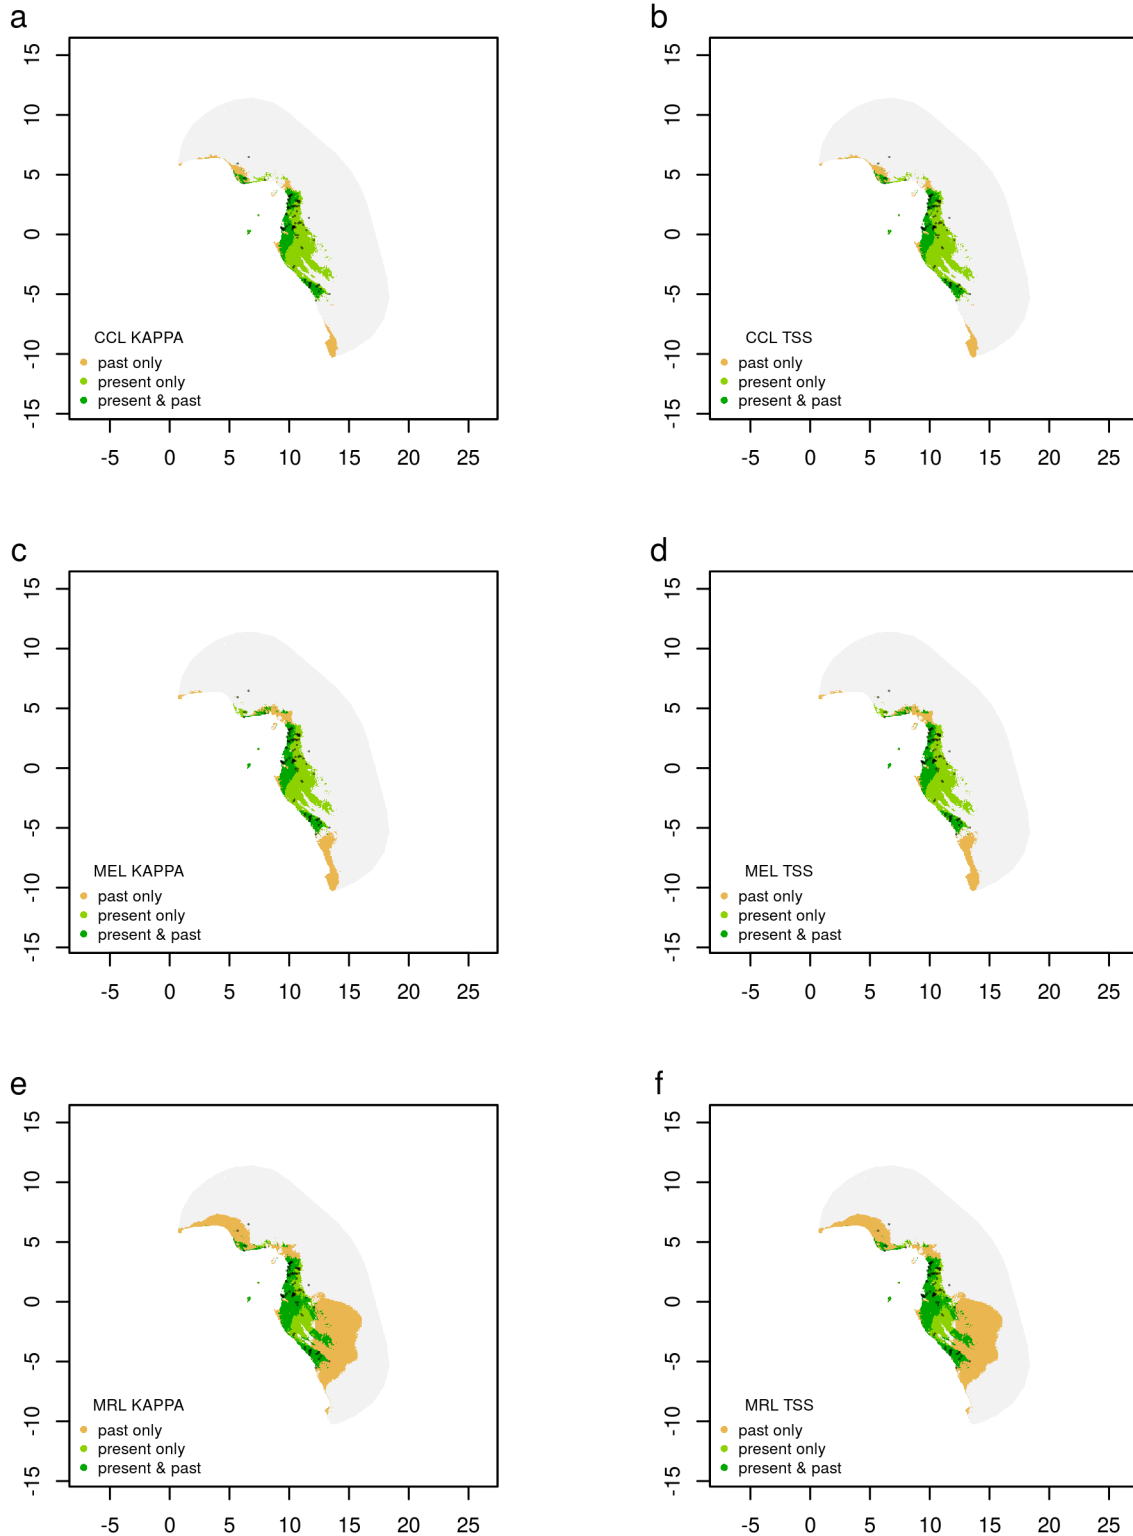

**Fig. S36.** Habitat suitability and stable areas inferred from ecological niche modelling for *P. barteri*. Suitability was summarised as binary maps for present and past climate, these were added together so that values of 0.5 indicate habitat only suitable in the past, values of 1 indicate areas only suitable in the present and values of 1.5 indicate areas suitable during both periods (stable areas). Results are from three different models of past climate: CCL (a-b), MEL (c-d), and MRL (e-f). Two statistics were used to infer binary maps: KAPPA (a, c, e) and the true skill statistic (TSS; b, d, f). Individual locations used in the modelling are shown as black points on each plot.

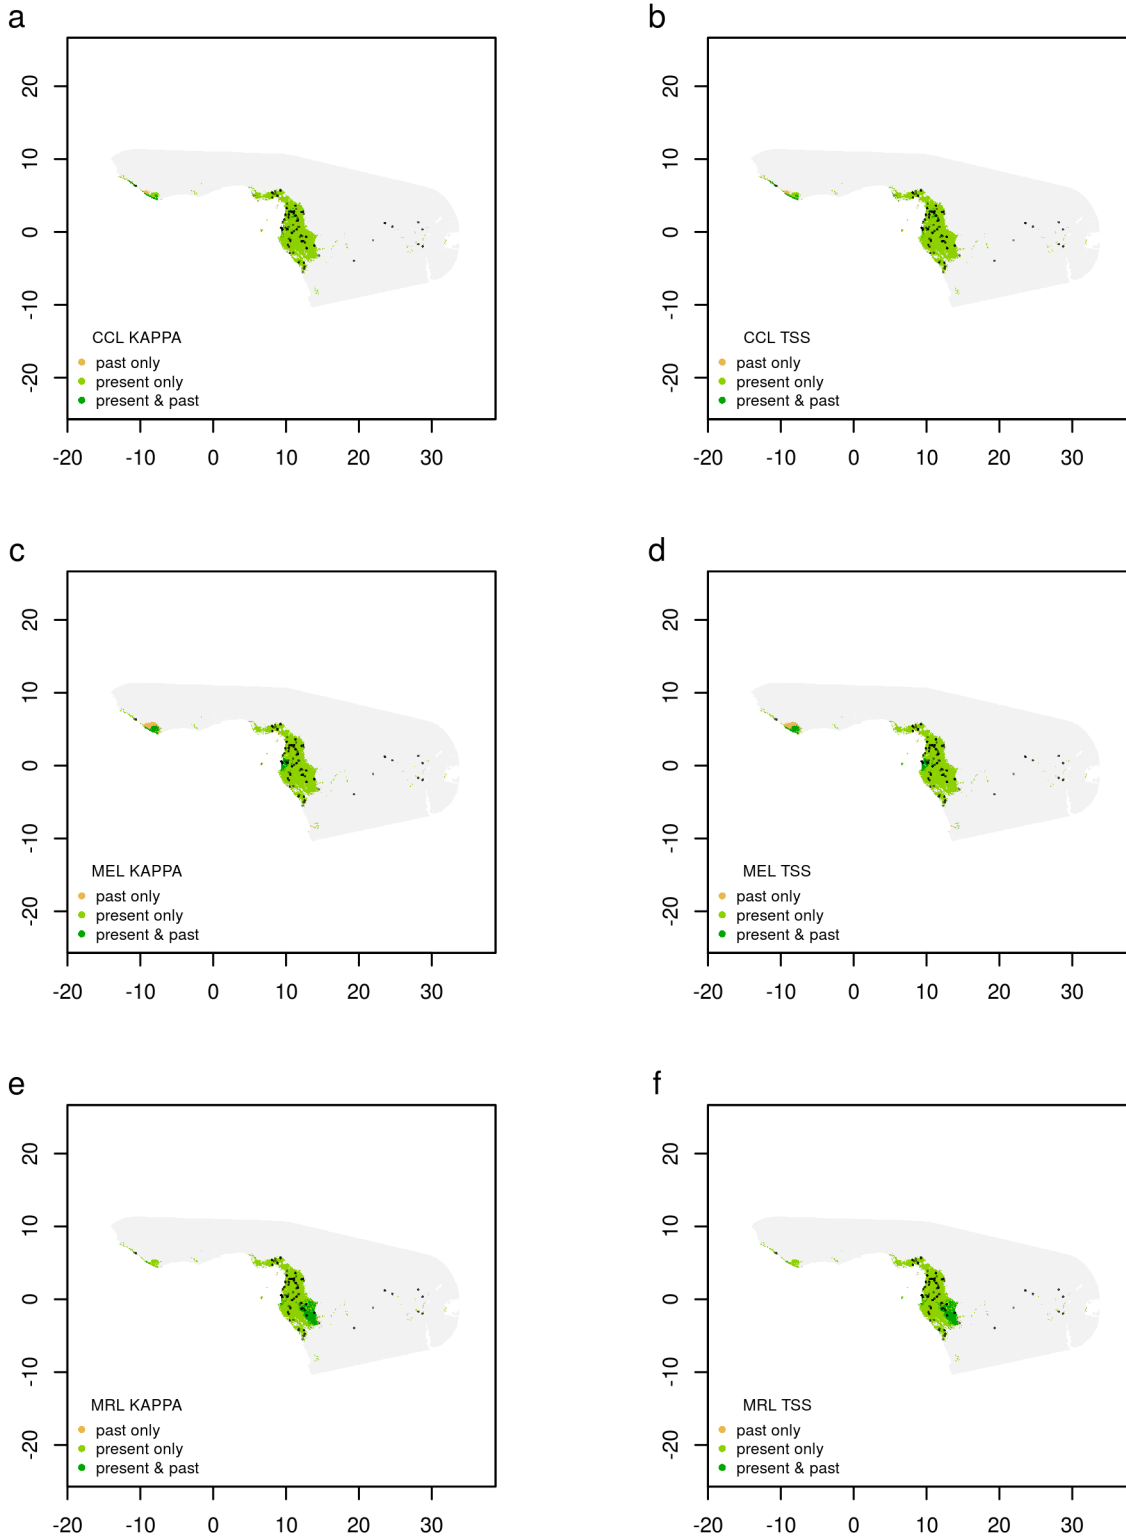

**Fig. S37.** Habitat suitability and stable areas inferred from ecological niche modelling for *S. manni*. Suitability was summarised as binary maps for present and past climate, these were added together so that values of 0.5 indicate habitat only suitable in the past, values of 1 indicate areas only suitable in the present and values of 1.5 indicate areas suitable during both periods (stable areas). Results are from three different models of past climate: CCL (a-b), MEL (c-d), and MRL (e-f). Two statistics were used to infer binary maps: KAPPA (a, c, e) and the true skill statistic (TSS; b, d, f). Individual locations used in the modelling are shown as black points on each plot.

| variable | model  | statistic    | A_affinis | A_mannii | G_suaveolens | M_enghiana | P_acaulis | P_barteri | S_mannii |
|----------|--------|--------------|-----------|----------|--------------|------------|-----------|-----------|----------|
| KAPPA    | ANN    | Cutoff       | 819.10    | 768.30   | 810.90       | 841.25     | 842.50    | 885.05    | 795.80   |
| KAPPA    | ANN    | Sensitivity  | 60.33     | 62.97    | 66.57        | 63.50      | 61.15     | 63.36     | 62.74    |
| KAPPA    | ANN    | Specificity  | 97.55     | 97.59    | 97.53        | 97.34      | 98.00     | 98.47     | 97.59    |
| KAPPA    | ANN    | Testing.data | 0.45      | 0.45     | 0.51         | 0.51       | 0.52      | 0.55      | 0.45     |
| KAPPA    | GBM    | Cutoff       | 617.75    | 592.10   | 598.20       | 603.50     | 613.90    | 616.60    | 608.35   |
| KAPPA    | GBM    | Sensitivity  | 62.14     | 62.27    | 69.94        | 64.48      | 77.47     | 61.52     | 69.53    |
| KAPPA    | GBM    | Specificity  | 96.66     | 94.56    | 94.67        | 96.98      | 94.40     | 97.63     | 95.28    |
| KAPPA    | GBM    | Testing.data | 0.44      | 0.39     | 0.45         | 0.51       | 0.50      | 0.51      | 0.43     |
| KAPPA    | GLM    | Cutoff       | 824.70    | 824.90   | 860.95       | 828.15     | 861.40    | 895.60    | 801.40   |
| KAPPA    | GLM    | Sensitivity  | 58.92     | 59.38    | 66.39        | 60.05      | 66.49     | 62.02     | 54.59    |
| KAPPA    | GLM    | Specificity  | 96.75     | 97.97    | 97.78        | 98.26      | 97.56     | 98.55     | 97.13    |
| KAPPA    | GLM    | Testing.data | 0.41      | 0.45     | 0.51         | 0.51       | 0.52      | 0.55      | 0.39     |
| KAPPA    | MAXENT | Cutoff       | 572.35    | 554.35   | 575.40       | 576.70     | 532.80    | 616.00    | 469.50   |
| KAPPA    | MAXENT | Sensitivity  | 56.12     | 55.18    | 63.02        | 62.38      | 64.03     | 65.58     | 57.12    |
| KAPPA    | MAXENT | Specificity  | 99.47     | 99.34    | 99.40        | 99.38      | 99.24     | 99.45     | 99.37    |
| KAPPA    | MAXENT | Testing.data | 0.59      | 0.54     | 0.64         | 0.66       | 0.64      | 0.68      | 0.54     |
| KAPPA    | RF     | Cutoff       | 849.94    | 824.05   | 761.40       | 841.17     | 845.55    | 865.05    | 847.44   |
| KAPPA    | RF     | Sensitivity  | 58.91     | 65.61    | 65.46        | 52.69      | 67.03     | 67.15     | 61.84    |
| KAPPA    | RF     | Specificity  | 96.95     | 95.80    | 95.97        | 96.69      | 94.62     | 96.76     | 97.47    |
| KAPPA    | RF     | Testing.data | 0.40      | 0.38     | 0.43         | 0.44       | 0.41      | 0.48      | 0.40     |
| TSS      | ANN    | Cutoff       | 288.00    | 278.70   | 282.50       | 241.20     | 209.90    | 257.30    | 262.30   |
| TSS      | ANN    | Sensitivity  | 89.67     | 91.52    | 89.15        | 88.16      | 94.87     | 93.95     | 85.65    |
| TSS      | ANN    | Specificity  | 82.98     | 72.77    | 81.62        | 82.30      | 71.97     | 72.90     | 91.89    |
| TSS      | ANN    | Testing.data | 0.80      | 0.80     | 0.78         | 0.79       | 0.81      | 0.83      | 0.78     |
| TSS      | GBM    | Cutoff       | 340.70    | 201.10   | 189.85       | 289.50     | 370.95    | 291.70    | 407.35   |
| TSS      | GBM    | Sensitivity  | 89.66     | 88.85    | 89.87        | 85.14      | 91.80     | 89.21     | 87.46    |
| TSS      | GBM    | Specificity  | 90.75     | 83.02    | 89.71        | 83.90      | 82.68     | 80.82     | 82.55    |
| TSS      | GBM    | Testing.data | 0.81      | 0.77     | 0.80         | 0.76       | 0.82      | 0.78      | 0.77     |
| TSS      | GLM    | Cutoff       | 366.60    | 425.60   | 442.30       | 422.10     | 393.90    | 392.10    | 327.00   |
| TSS      | GLM    | Sensitivity  | 91.01     | 90.29    | 92.88        | 92.26      | 94.02     | 94.11     | 86.65    |
| TSS      | GLM    | Specificity  | 90.19     | 91.62    | 90.77        | 82.87      | 90.93     | 90.82     | 81.71    |
| TSS      | GLM    | Testing.data | 0.81      | 0.82     | 0.84         | 0.82       | 0.85      | 0.85      | 0.76     |
| TSS      | MAXENT | Cutoff       | 62.70     | 44.10    | 45.90        | 39.10      | 29.10     | 66.30     | 68.10    |
| TSS      | MAXENT | Sensitivity  | 90.97     | 90.65    | 93.91        | 91.88      | 93.36     | 92.43     | 93.73    |
| TSS      | MAXENT | Specificity  | 83.21     | 92.06    | 74.63        | 74.00      | 73.94     | 65.82     | 74.42    |
| TSS      | MAXENT | Testing.data | 0.81      | 0.83     | 0.84         | 0.80       | 0.82      | 0.82      | 0.79     |
| TSS      | RF     | Cutoff       | 467.56    | 414.75   | 336.00       | 434.22     | 504.45    | 450.70    | 370.61   |
| TSS      | RF     | Sensitivity  | 91.04     | 91.39    | 93.92        | 89.87      | 88.84     | 89.74     | 90.93    |
| TSS      | RF     | Specificity  | 88.81     | 89.51    | 76.63        | 86.54      | 89.67     | 89.52     | 89.99    |
| TSS      | RF     | Testing.data | 0.80      | 0.81     | 0.78         | 0.76       | 0.79      | 0.79      | 0.81     |

**Table S6. Evaluation of ecological niche models extracted from 'models.out' files from biomod2 runs. Values for each pseudoabsence replicate were averaged across species.**

145 **distance-based RedunDancy Analysis (db-RDA)**

146 We used db-RDA to uncover how genetic variance could be attributed to different geographic, historic and biological variables.  
147 Our approach was based on the following tutorial (<https://github.com/laurabenestan/db-RDA-and-db-MEM/>). Genetic  
148 distances were calculated using Principal Coordinates Analysis (PCoA) on a genetic distance matrix, which was used as a  
149 response variable. We used Moran Eigenvector's Maps (MEMs) to summarise spatial structure in the data. This multivariate  
150 approach outputs db-MEMs where the first explain patterns at large spatial scales, with spatial scale decreasing with each  
151 db-MEM. Explanatory variables included those variables used for ENMs, MEMs, several variables related to stable areas  
152 and USDA soil taxonomy. A list of the explanatory variables used can be found in Table S5. Unlike the AMOVA analyses,  
153 climate-based measures of stability for rainfall and temperature were kept separate for db-RDA analyses. Correlation among  
154 explanatory variables was examined and variables were pruned based on a threshold of 0.9 (Pearson). We then used Variance  
155 Inflation Factor (VIF) to look for multicollinearity within the model. Variables with a VIF of >10 were iteratively removed the  
156 model, starting with the variable with the largest VIF until all VIF values were <10. We built our db-RDA model by adding  
157 and removing variables in order to maximise the explained variance, but ensuring that the amount explained did not exceed  
158 the that of the full model, to avoid overfitting. Once this process finished, the final model was obtained and we visualized the  
159 results using biplots, shown below. The relative importance of different categories of explanatory variables for each species is  
160 shown in Figure 5 in the main text.

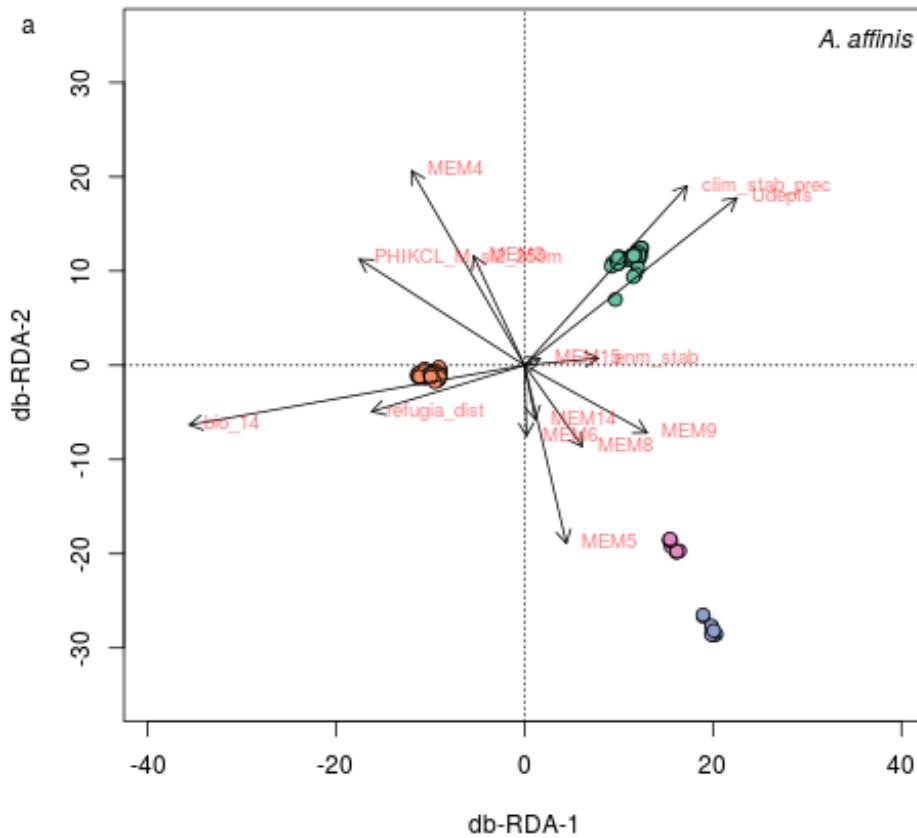

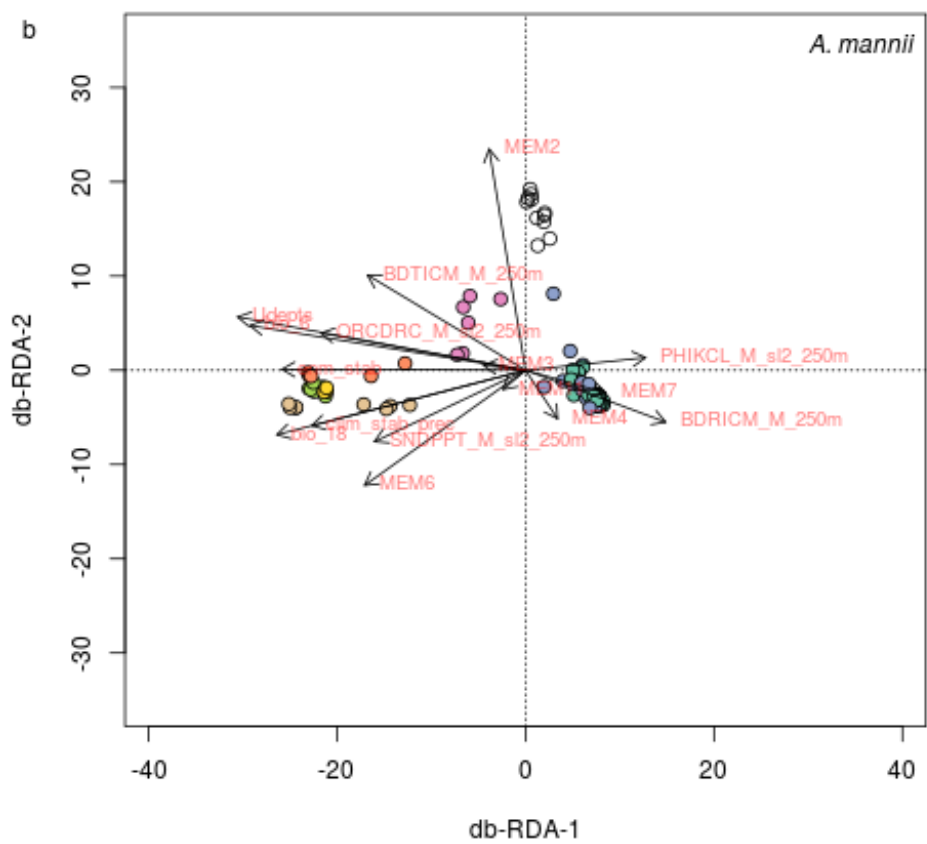

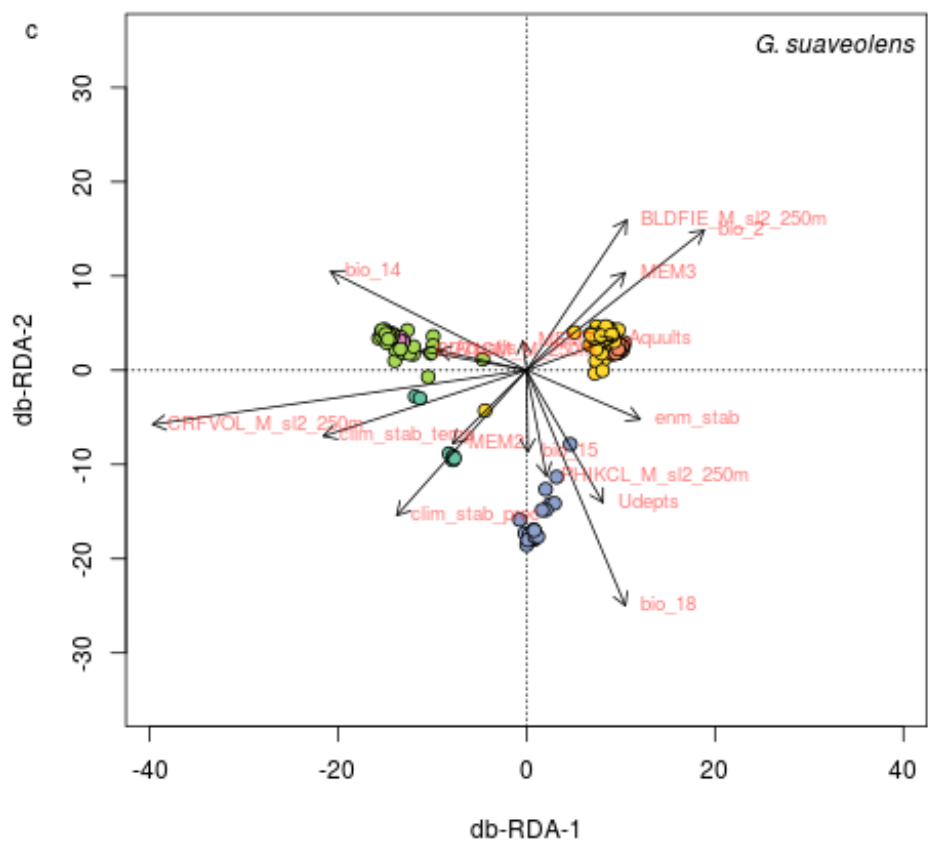

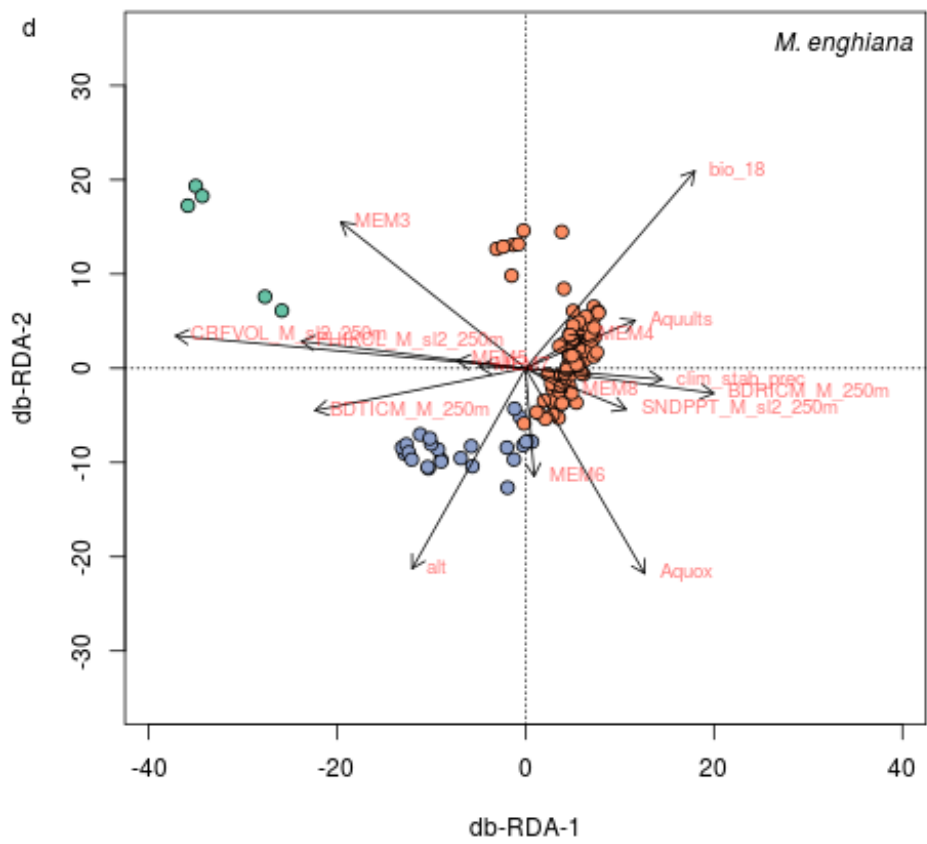



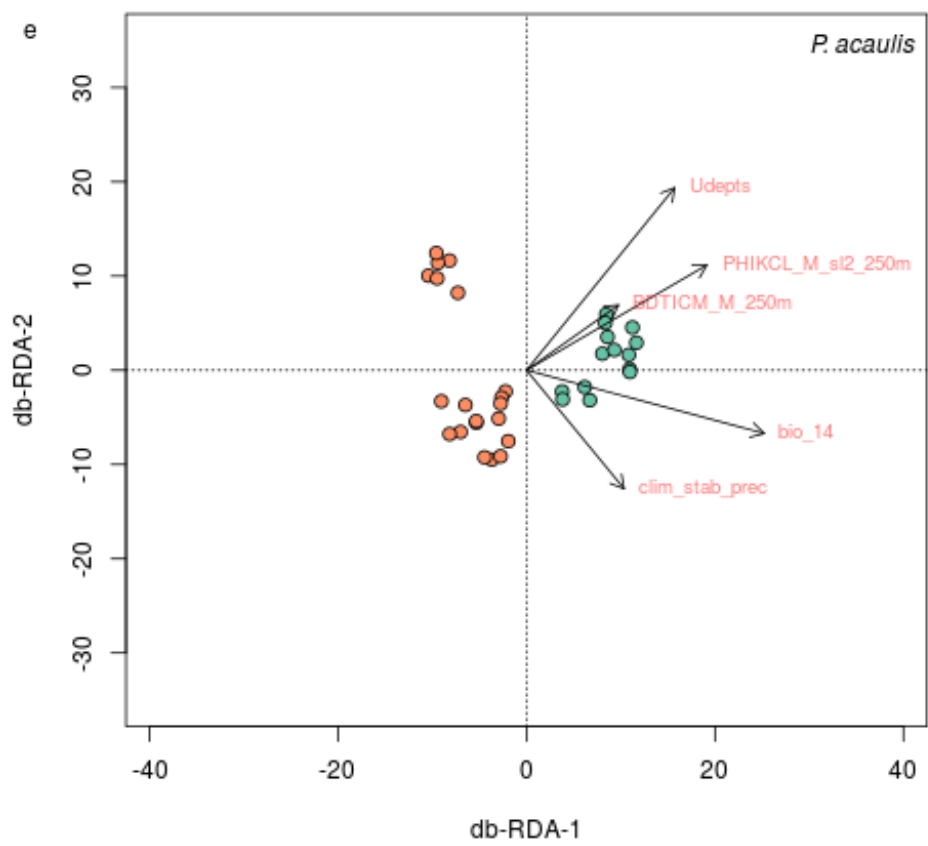

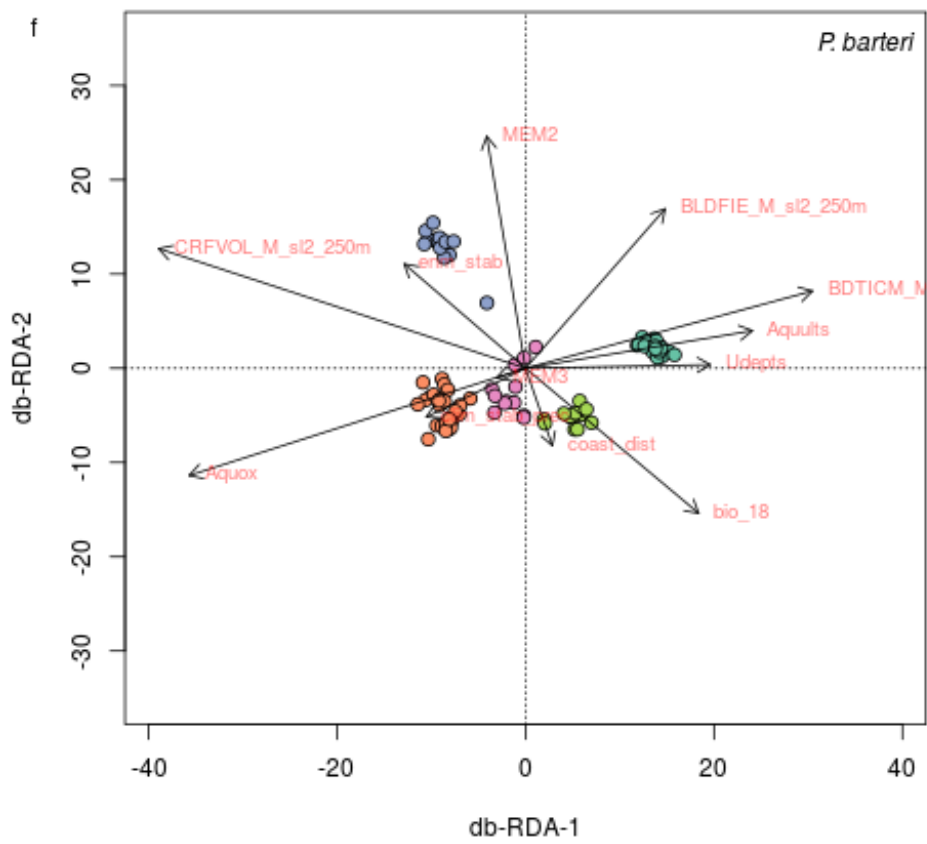

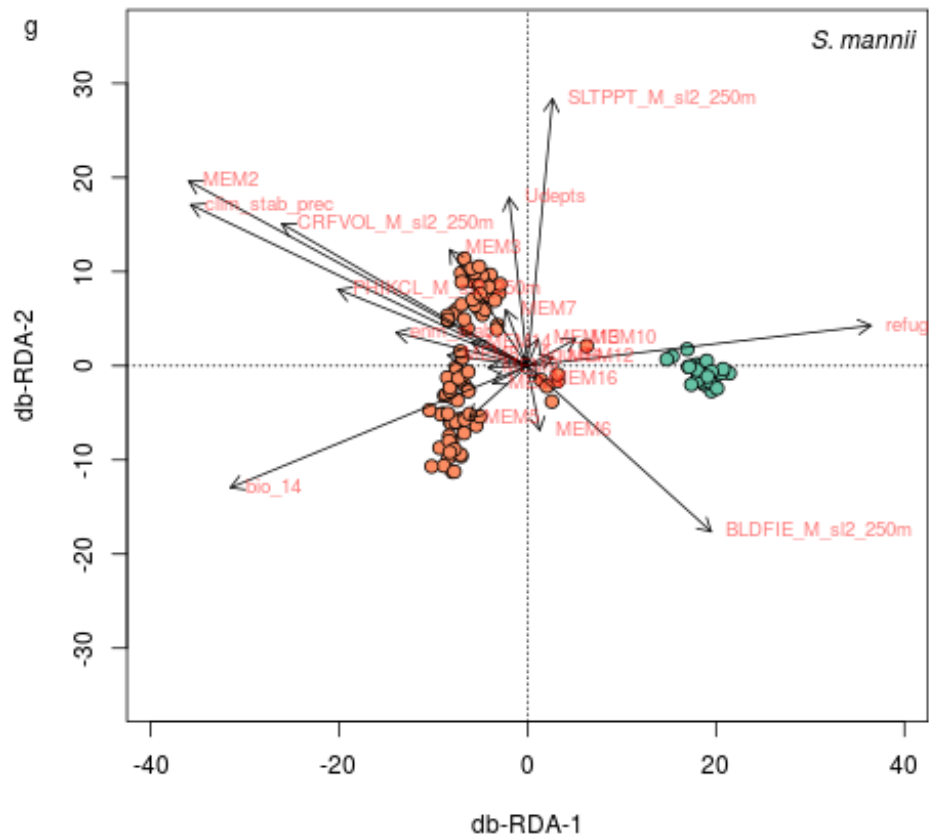

**Fig. S38.** Biplots of the distance-based redundancy analyses (db-RDA) for (a) *A. affinis*, (b) *A. mannii*, (c) *G. suaveolens*, (d) *M. enghiana*, (e) *P. acaulis*, (f) *P. barteri* and (g) *S. mannii*. The first two RDA axes are shown on the x and y axes. Arrows indicate the direction in which increasing values for variables, shown adjacent in red, explain genetic variance. The length of the arrow shows the level of variation explained by the associated variable. Individuals are represented as circles (point locations scaled by a factor of 10), coloured by their associated DAPC cluster.

|    | Species | Variable          | Category  | R-squared |
|----|---------|-------------------|-----------|-----------|
|    | anni    | bio_14            | Climate   | 0.12911   |
| 2  | anni    | PHIKCL_M_sl2_250m | Soil      | 0.07142   |
| 3  | anni    | clim_stab_prec    | Stability | 0.06003   |
| 4  | anni    | MEM5              | Geography | 0.04111   |
| 5  | anni    | MEM3              | Geography | 0.02306   |
| 6  | anni    | MEM4              | Geography | 0.02179   |
| 7  | anni    | MEM9              | Geography | 0.01858   |
| 8  | anni    | MEM6              | Geography | 0.01693   |
| 9  | anni    | enm_stab          | Stability | 0.01524   |
| 10 | anni    | Inceptisols       | Soil      | 0.01939   |
| 11 | anni    | refugia_dist      | Stability | 0.00854   |
| 12 | anni    | MEM8              | Geography | 0.00851   |
| 13 | anni    | MEM15             | Geography | 0.00695   |
| 14 | anni    | MEM14             | Geography | 0.00712   |
| 16 | anon    | Inceptisols       | Soil      | 0.09663   |
| 17 | anon    | MEM6              | Geography | 0.05654   |
| 18 | anon    | MEM2              | Geography | 0.05662   |
| 19 | anon    | bio_6             | Climate   | 0.05389   |
| 20 | anon    | ORCDRC_M_sl2_250m | Soil      | 0.02507   |
| 21 | anon    | MEM7              | Geography | 0.02345   |
| 22 | anon    | SNDPPT_M_sl2_250m | Soil      | 0.01217   |
| 23 | anon    | enm_stab          | Stability | 0.01054   |
| 24 | anon    | clim_stab_prec    | Stability | 0.00866   |
| 25 | anon    | MEM3              | Geography | 0.00890   |
| 26 | anon    | PHIKCL_M_sl2_250m | Soil      | 0.01461   |
| 27 | anon    | bio_18            | Climate   | 0.00901   |
| 28 | anon    | BDRICM_M_250m     | Soil      | 0.00692   |
| 29 | anon    | MEM4              | Geography | 0.00667   |
| 30 | anon    | BDTICM_M_250m     | Soil      | 0.00825   |
| 31 | anon    | MEM11             | Geography | 0.00468   |
| 33 | green   | CRFVOL_M_sl2_250m | Soil      | 0.15570   |
| 34 | green   | bio_18            | Climate   | 0.06829   |
| 35 | green   | bio_2             | Climate   | 0.02023   |
| 36 | green   | bio_14            | Climate   | 0.01987   |
| 37 | green   | PHIKCL_M_sl2_250m | Soil      | 0.00989   |
| 38 | green   | Alfisols          | Soil      | 0.00967   |
| 39 | green   | BLDFIE_M_sl2_250m | Soil      | 0.00532   |
| 40 | green   | Inceptisols       | Soil      | 0.00477   |
| 41 | green   | bio_15            | Climate   | 0.00411   |
| 42 | green   | BDTICM_M_250m     | Soil      | 0.00487   |
| 43 | green   | Ultisols          | Soil      | 0.00391   |
| 44 | green   | MEM2              | Geography | 0.00340   |
| 45 | green   | MEM3              | Geography | 0.00356   |
| 46 | green   | enm_stab          | Stability | 0.00359   |
| 47 | green   | clim_stab_prec    | Stability | 0.00362   |
| 48 | green   | MEM7              | Geography | 0.00265   |
| 49 | green   | clim_stab_temp    | Stability | 0.00245   |
| 51 | mona    | CRFVOL_M_sl2_250m | Soil      | 0.04345   |
| 52 | mona    | bio_18            | Climate   | 0.02349   |
| 53 | mona    | MEM3              | Geography | 0.01622   |
| 54 | mona    | SNDPPT_M_sl2_250m | Soil      | 0.01124   |
| 55 | mona    | alt               | Geography | 0.01269   |
| 56 | mona    | BDRICM_M_250m     | Soil      | 0.00756   |
| 57 | mona    | MEM7              | Geography | 0.00747   |
| 58 | mona    | clim_stab_prec    | Stability | 0.00431   |
| 59 | mona    | MEM4              | Geography | 0.00455   |
| 60 | mona    | BDTICM_M_250m     | Soil      | 0.00352   |
| 61 | mona    | MEM6              | Geography | 0.00349   |
| 62 | mona    | PHIKCL_M_sl2_250m | Soil      | 0.00321   |
| 63 | mona    | MEM8              | Geography | 0.00207   |

|     |        |                   |           |         |
|-----|--------|-------------------|-----------|---------|
| 64  | mona   | Oxisols           | Soil      | 0.00207 |
| 65  | mona   | Ultisols          | Soil      | 0.00272 |
| 66  | mona   | MEM5              | Geography | 0.00300 |
| 68  | podoa  | bio_14            | Climate   | 0.03020 |
| 69  | podoa  | Inceptisols       | Soil      | 0.02291 |
| 70  | podoa  | clim_stab_prec    | Stability | 0.02255 |
| 71  | podoa  | BDTICM_M_250m     | Soil      | 0.01590 |
| 72  | podoa  | PHIKCL_M_sl2_250m | Soil      | 0.01027 |
| 74  | podob  | CRFVOL_M_sl2_250m | Soil      | 0.06950 |
| 75  | podob  | Oxisols           | Soil      | 0.03819 |
| 76  | podob  | bio_18            | Climate   | 0.03055 |
| 77  | podob  | BLDFIE_M_sl2_250m | Soil      | 0.01924 |
| 78  | podob  | coast_dist        | Stability | 0.01501 |
| 79  | podob  | MEM2              | Geography | 0.01285 |
| 80  | podob  | Ultisols          | Soil      | 0.01176 |
| 81  | podob  | Inceptisols       | Soil      | 0.00772 |
| 82  | podob  | BDTICM_M_250m     | Soil      | 0.00900 |
| 83  | podob  | MEM3              | Geography | 0.00522 |
| 84  | podob  | clim_stab_prec    | Stability | 0.00408 |
| 85  | podob  | enm_stab          | Stability | 0.00315 |
| 87  | sclero | MEM2              | Geography | 0.05109 |
| 88  | sclero | bio_14            | Climate   | 0.05146 |
| 89  | sclero | SLTPPT_M_sl2_250m | Soil      | 0.01623 |
| 90  | sclero | MEM3              | Geography | 0.01969 |
| 91  | sclero | Inceptisols       | Soil      | 0.00988 |
| 92  | sclero | MEM6              | Geography | 0.00877 |
| 93  | sclero | MEM7              | Geography | 0.00595 |
| 94  | sclero | MEM5              | Geography | 0.00509 |
| 95  | sclero | MEM8              | Geography | 0.00518 |
| 96  | sclero | MEM10             | Geography | 0.00403 |
| 97  | sclero | PHIKCL_M_sl2_250m | Soil      | 0.00379 |
| 98  | sclero | CRFVOL_M_sl2_250m | Soil      | 0.00313 |
| 99  | sclero | Ultisols          | Soil      | 0.00279 |
| 100 | sclero | BLDFIE_M_sl2_250m | Soil      | 0.00266 |
| 101 | sclero | refugia_dist      | Stability | 0.00193 |
| 102 | sclero | clim_stab_prec    | Stability | 0.00293 |
| 103 | sclero | MEM14             | Geography | 0.00278 |
| 104 | sclero | MEM9              | Geography | 0.00276 |
| 105 | sclero | MEM4              | Geography | 0.00234 |
| 106 | sclero | MEM12             | Geography | 0.00191 |
| 107 | sclero | MEM13             | Geography | 0.00162 |
| 108 | sclero | enm_stab          | Stability | 0.00156 |
| 109 | sclero | MEM16             | Geography | 0.00110 |

**Table S7. Variable importance for final db-RDA models. For each species the variables present in the final db-RDA model are shown and the corresponding R-squared value. The category each model falls into is also noted.**

## References

1. Oksanen J, et al. (2019) vegan: Community Ecology Package. R package version 2.5-2. *Cran R*.
2. Maley J (1996) The African rain forest - Main characteristics of changes in vegetation and climate from the Upper Cretaceous to the Quaternary. *Proceedings of the Royal Society of Edinburgh Section B: Biological Sciences* 104:31–73.
3. Anhuf D, et al. (2006) Paleo-environmental change in Amazonian and African rainforest during the LGM. *Palaeogeography, Palaeoclimatology, Palaeoecology* 239(3-4):510–527.
4. Excoffier L, Smouse PE, Quattro JM (1992) Analysis of molecular variance inferred from metric distances among DNA haplotypes: Application to human mitochondrial DNA restriction data. *Genetics* 131(2):479–491.
5. Kamvar ZN, Tabima JF, Grunwald NJ (2014) Poppr: An R package for genetic analysis of populations with clonal, partially clonal, and/or sexual reproduction. *PeerJ* 2014(1):1–14.
6. Upham NNS, Esselstyn JA, Jetz W (2019) Inferring the mammal tree: species-level sets of phylogenies for questions in ecology, evolution, and conservation. *PLoS Biology* 17(12):e3000494.
7. Andermann T, et al. (2019) Allele Phasing Greatly Improves the Phylogenetic Utility of Ultraconserved Elements. *Systematic Biology* 68(1):32–46.
8. Andermann T, Cano Á, Zizka A, Bacon C, Antonelli A (2018) SECAPR-A bioinformatics pipeline for the rapid and user-friendly processing of targeted enriched Illumina sequences, from raw reads to alignments. *PeerJ* 2018(7):e5175.
9. Jones GR (2019) Divergence Estimation in the Presence of Incomplete Lineage Sorting and Migration. *Systematic Biology* 68(1):19–31.
10. Hey J (2010) Isolation with migration models for more than two populations. *Molecular Biology and Evolution* 27(4):905–920.
11. Leaché AD, Harris RB, Rannala B, Yang Z (2014) The influence of gene flow on species tree estimation: A simulation study. *Systematic Biology* 63(1):17–30.
12. Warren DL, Glor RE, Turelli M (2010) ENMTools: A toolbox for comparative studies of environmental niche models. *Ecography* 33(3):607–611.
13. Thuiller W, Georges D, Engler R (2013) biomod2: Ensemble platform for species distribution modeling. *R package version* 2(7):r560.
14. Dauby G, et al. (2017) ConR: An R package to assist large-scale multispecies preliminary conservation assessments using distribution data. *Ecology and Evolution* 7(24):11292–11303.
